# Supplementary material for: Quercetin Prevents Intestinal Stem Cell Aging via Scavenging ROS and Inhibiting Insulin Signaling in Drosophila
Source: MDPI journal article supplement (doi:10.3390/antiox12010059), 2022-12-27
Supplement: s1 [file s1]

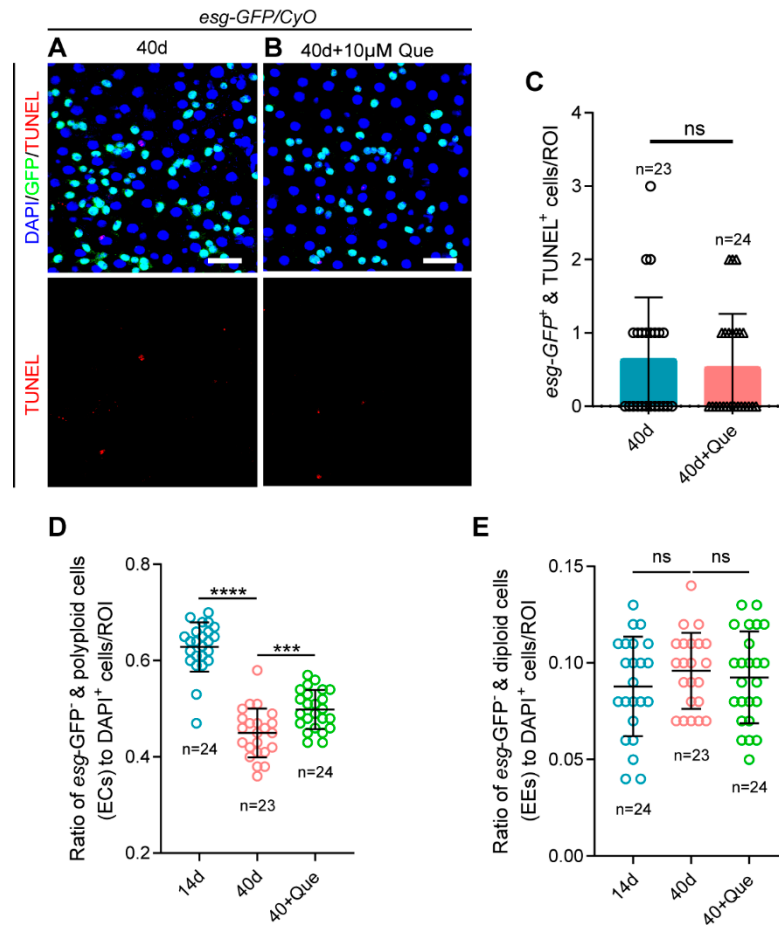

**Figure S1: Que supplementation did not cause ISC apoptosis.** (A, B) Representative immunofluorescence images of 40-day-old (A) posterior midguts without Que supplementation and 40-day-old posterior midguts with 10  $\mu$ M Que supplementation (B) stained with DAPI (blue; nuclei), GFP (green; ISCs and progenitor cells marker), and TUNEL (red; apoptosis marker). The top panels represent the merged images and the bottom panels represent TUNEL. Scale bars represent 25  $\mu$ m. (C) The number of *esg-GFP*<sup>+</sup> & TUNEL<sup>+</sup> cells per ROI in the posterior midguts of flies in experiments A, B. n: number of ROI counted. (D, E) The ratio of *esg-GFP* negative & polyploid cells (ECs) and *esg-GFP* negative & diploid cells (EEs) to DAPI<sup>+</sup> cells per ROI in the posterior midguts of 14-day-old, 40-day-old flies without Que supplementation and 40-day-old flies with 10  $\mu$ M Que supplementation. n: number of ROI counted.

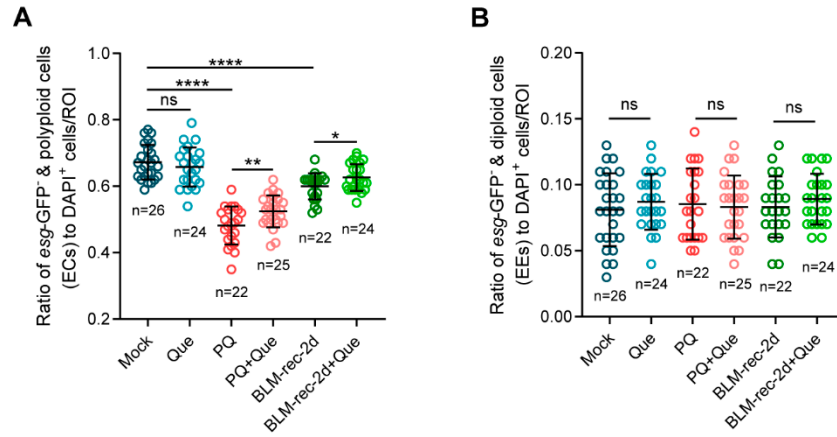

**Figure S2: The effect of Que on the number of ECs or EEs in stress stimulated flies. (A, B)** The ratio of *esg*-GFP negative & polyploid cells (ECs) and *esg*-GFP negative & diploid cells (EEs) to DAPI<sup>+</sup> cells per ROI in the posterior midguts of Mock (DMSO), Que, PQ + DMSO, PQ + Que, BLM-rec-2d + DMSO, and BLM-rec-2d + Que flies related to Figure 2A-F. n: number of ROI counted.

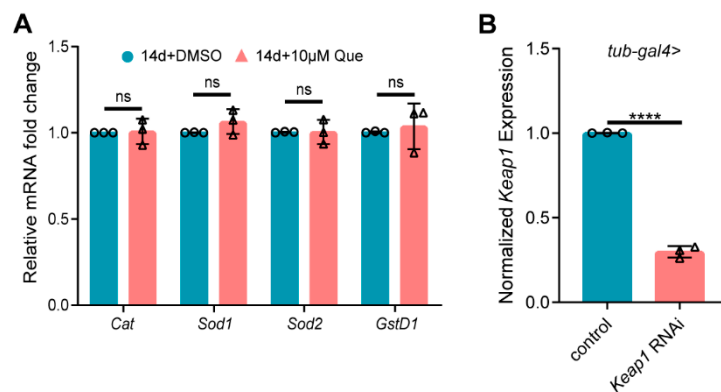

**Figure S3: RT-qPCR analysis of the antioxidant-related genes in the midgut of 14-day-old flies.** (A) RT-qPCR analysis of the antioxidant-related genes (*Cat*, *Sod1*, *Sod2*, and *GstD1*) in the midguts of 14-day-old flies fed with or without Que. Three independent experiments were conducted. (B) RT-qPCR analysis to show the RNAi-mediated knockdown efficiency for *Keap1 RNAi* line. Three independent experiments were conducted.

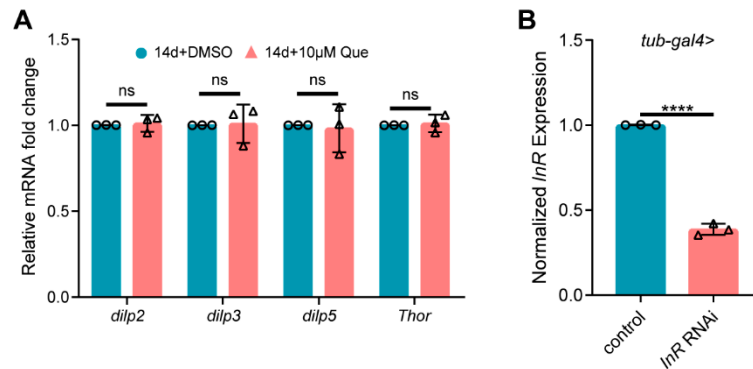

**Figure S4: RT-qPCR analysis of the insulin signaling-related genes in the midgut of 14-day-old flies.** (A) RT-qPCR analysis of insulin signaling pathway-related genes (*dilp2*, *dilp3*, *dilp5*, and *Thor*) in the *esg-GFP<sup>+</sup>* cells of 14-day-old flies fed with or without Que. Three independent experiments were conducted. (B) RT-qPCR analysis to show the RNAi-mediated knockdown efficiency for *InR RNAi* line. Three independent experiments were conducted.

| Table S1. The list of the <i>Drosophila</i> genotypes |                                                                                                |
|-------------------------------------------------------|------------------------------------------------------------------------------------------------|
| <b>Figure 1</b>                                       |                                                                                                |
| <b>D-G</b>                                            | <i>w<sup>-</sup>; esg-GFP/CyO; +/+</i>                                                         |
| <b>Figure 2</b>                                       |                                                                                                |
| <b>A-F</b>                                            | <i>w<sup>-</sup>; esg-GFP/CyO; +/+</i>                                                         |
| <b>J, K</b>                                           | <i>w<sup>-</sup>; + /+; +/+</i>                                                                |
| <b>Figure 3</b>                                       |                                                                                                |
| <b>A, D, F, H, I</b>                                  | <i>w<sup>-</sup>; + /+; +/+</i>                                                                |
| <b>Figure 4</b>                                       |                                                                                                |
| <b>A</b>                                              | <i>w<sup>-</sup>; + /+; +/+</i>                                                                |
| <b>B-D</b>                                            | <i>w<sup>-</sup>; esg-GFP/CyO; +/+</i>                                                         |
| <b>F</b>                                              | <i>w<sup>-</sup>; esg-Gal4, UAS-GFP, tub-Gal80<sup>ts</sup>/ UAS-lacZ; +/+</i>                 |
| <b>G, H</b>                                           | <i>w<sup>-</sup>; esg-Gal4, UAS-GFP, tub-Gal80<sup>ts</sup>/UAS-Cat; +/+</i>                   |
| <b>I, J</b>                                           | <i>w<sup>-</sup>; esg-Gal4, UAS-GFP, tub-Gal80<sup>ts</sup>/UAS-Keap1 RNAi; +/+</i>            |
| <b>Figure 5</b>                                       |                                                                                                |
| <b>A, B</b>                                           | <i>w<sup>-</sup>; + /+; +/+</i>                                                                |
| <b>C -F</b>                                           | <i>w<sup>-</sup>; esg-GFP/CyO; +/+</i>                                                         |
| <b>H</b>                                              | <i>w<sup>-</sup>; esg-Gal4, UAS-GFP, tub-Gal80<sup>ts</sup>/ UAS-lacZ; +/+</i>                 |
| <b>I, J</b>                                           | <i>w<sup>-</sup>; esg-Gal4, UAS-GFP, tub-Gal80<sup>ts</sup>/ +; UAS-InR-DN/+</i>               |
| <b>K, L</b>                                           | <i>w<sup>-</sup>; esg-Gal4, UAS-GFP, tub-Gal80<sup>ts</sup>/ UAS-InR RNAi; +/+</i>             |
| <b>Figure 6</b>                                       |                                                                                                |
| <b>A</b>                                              | <i>w<sup>-</sup>; esg-Gal4, UAS-GFP, tub-Gal80<sup>ts</sup>/ UAS-lacZ; +/+</i>                 |
| <b>B, C</b>                                           | <i>w<sup>-</sup>; esg-Gal4, UAS-GFP, tub-Gal80<sup>ts</sup>/UAS-Cat; UAS-InR-DN /+</i>         |
| <b>D, E</b>                                           | <i>w<sup>-</sup>; esg-Gal4, UAS-GFP, tub-Gal80<sup>ts</sup>/ UAS-Keap1 RNAi; UAS-InR-DN /+</i> |

| <b>Table S2 (Reagent Table). The list of the primary antibodies</b> |                                              |                 |
|---------------------------------------------------------------------|----------------------------------------------|-----------------|
| <b>Reagent</b>                                                      | <b>Source</b>                                | <b>Dilution</b> |
| Chicken polyclonal anti-GFP                                         | Abcam Cat# ab13970<br>RRID:AB_300798         | 1: 1000         |
| Mouse anti-Delta                                                    | DSHB Cat# C594.9B<br>RRID:AB_528194          | 1: 50           |
| Rabbit anti-Phospho-Akt<br>(Ser473)                                 | Cell Signaling Cat# 4060S<br>RRID:AB_2315049 | 1: 200          |
| Rabbit anti-phosphoHistone H3<br>(Ser10)                            | Millipore Cat# 06-570<br>RRID:AB_310177      | 1: 1000         |

| Table S3. The list of the primers |                                                                          |
|-----------------------------------|--------------------------------------------------------------------------|
| Target                            | Sequence                                                                 |
| <i>Cat</i>                        | F: 5'-TTCCTGTGGGCAAAATGGTG-3'<br>R: 5'-ATCTTCACCTTGTACGGGCA-3'           |
| <i>Sod1</i>                       | F: 5'- CTGCTCTGCTACGGTCACAC-3'<br>R: 5'- ACAGCTTTAACCACCATTTCG-3'        |
| <i>Sod2</i>                       | F: 5'- ATAAGCATCTGCGGATCGGA-3'<br>R: 5'- ACGCCTTTGTGAAGCGTTATC-3'        |
| <i>GstD1</i>                      | F: 5'- CATCGCGAGTTTCACAACAG-3'<br>R: 5'- GTTGAGCAGCTTCTTGTTTCAG-3'       |
| <i>dilp2</i>                      | F: 5'- GGCCAGCTCCACAGTGAAGT-3'<br>R: 5'- TCGCTGTCTGGCACCGGGCAT-3'        |
| <i>dilp3</i>                      | F: 5'- AAGCTCTGTGTGTATGGCTT-3'<br>R: 5'- AGCACAATATCTCAGCACCT-3'         |
| <i>dilp5</i>                      | F: 5'- TGTTCGCCAAACGAGGCACCTTGG-3'<br>R: 5'- CACGATTTGCGGCAACAGGAGTCG-3' |
| <i>4EBP</i>                       | F: 5'- CACTCCTGGAGGCACCA-3'<br>R: 5'- GAGTTCCCCTCAGCAAGCAA-3'            |
| <i>Rp49</i>                       | F: 5'- ATCGGTTACGGATCGAACAAGC -3'<br>R: 5'- GTAAACGCGGTTCTGCATGAGC -3'   |
