# Supplementary material for: Quercetin Prevents Intestinal Stem Cell Aging via Scavenging ROS and Inhibiting Insulin Signaling in Drosophila
Source: Antioxidants (Basel). 2022 Dec 27;12(1):59. doi: 10.3390/antiox12010059 (PMC9854609; doi:10.3390/antiox12010059)
Supplement: Supplementary file 1 [file antioxidants-12-00059-s001.zip › Supplementary Files/Table S4.xlsx]

## Sheet: Sheet1
Table S4. The list of gene accession numbers for all the genes used in Figure 5. (genes in green color are statistically significant)
Geneid	Que1	Que2	Que3	Que4	DMSO1	DMSO2	DMSO3	DMSO4	logFC	logCPM	F	PValue	FDR
jumu	2.88326	3.1417	2.26236	2.57327	4.20262	3.98575	4.20594	3.70482	-0.543456	3.70638	18.6962	0.00127052	0.960773
Ude	20.8231	23.4549	20.9017	21.1675	28.0704	34.5697	28.687	27.6684	-0.439752	5.36772	16.3359	0.00203183	0.960773
CR42652	22.3332	44.6336	27.243	41.6839	22.0192	13.521	13.4241	20.4394	0.992898	2.95141	15.9431	0.00220624	0.960773
CG14204	1.19473	1.92853	1.15326	0.994253	2.43209	2.11981	3.39793	2.18578	-0.918407	2.42964	15.7726	0.0022875	0.960773
CR32864	100.393	204.15	137.442	188.953	113.468	70.7973	66.319	91.3639	0.906781	5.18725	15.5477	0.00241343	0.960773
CG32454	0.831778	0.869565	0.779832	0.655075	0.452524	0.489588	0.326471	0.399653	0.930292	0.214274	14.4036	0.00308682	0.960773
CG9394	55.9769	41.3093	60.1484	47.6004	37.0065	41.0193	33.1408	34.0196	0.52371	6.66521	14.3949	0.00309288	0.960773
14030806..14035334	4.97088	2.90823	3.43507	4.00916	2.61925	2.50435	2.62566	2.48287	0.608698	3.86372	14.1245	0.00328848	0.960773
Rad1	0.72853	0.410545	0.717029	0.532905	0.279778	0.264857	0.262398	0.267681	1.16521	-0.522099	14.062	0.00333569	0.960773
Sws1	0.72853	0.410545	0.717029	0.532905	0.279778	0.264857	0.262398	0.267681	1.16521	-0.522099	14.062	0.00333569	0.960773
CR44962	3.22887	2.72219	2.68824	2.80552	1.71535	1.47952	1.61704	2.04236	0.763437	0.878	13.8832	0.00347546	0.960773
Mp	1.14741	1.31631	1.43014	1.2426	1.67969	1.68842	1.92912	1.81908	-0.44723	3.33808	13.7645	0.00357211	0.960773
CG9717	0.985163	0.801373	0.890252	1.25163	1.59408	1.57194	1.72186	1.42576	-0.659139	1.80422	13.2668	0.00401394	0.960773
Karl	1.16477	1.0202	0.887061	0.880632	0.564886	0.678731	0.548603	0.671579	0.704742	1.17027	13.1682	0.004109	0.960773
CG14618	9.3555	8.43981	10.5528	8.67953	7.25482	6.96069	6.88193	6.81847	0.431674	3.30598	13.0104	0.00426682	0.960773
CG2990	0.189943	0.252072	0.259026	0.274848	0.402613	0.457368	0.471712	0.414836	-0.815186	0.398629	12.7451	0.00454869	0.960773
rha	1.62402	0.866026	1.64293	1.95495	0.885269	0.929716	0.887156	0.869387	0.793746	2.39012	12.2594	0.00512473	0.960773
Cortactin	272.439	304.802	224.481	246.507	323.897	363.872	384.166	353.15	-0.420844	9.56327	12.1145	0.00531319	0.960773
stg	1.18309	1.47711	1.13765	1.05306	1.70351	1.70428	1.72058	2.13419	-0.5581	2.2327	12.0586	0.00538809	0.960773
CycA	15.6758	19.222	15.3858	14.8684	20.8073	21.4192	24.0738	20.3817	-0.389242	5.79155	11.9061	0.00559879	0.960773
GLaz	5.3913	4.4652	5.52646	6.09233	3.9542	3.14253	3.50077	4.32574	0.54985	2.48294	11.8903	0.00562118	0.960773
CG1139	2.1763	3.30934	2.0927	3.24752	4.11583	3.77177	4.44181	4.53124	-0.614506	2.46465	11.5379	0.0061498	0.960773
Vha68-1	5.64219	5.93892	7.12734	6.62916	4.9963	4.89762	4.52047	5.18222	0.394403	3.91722	11.4915	0.00622371	0.960773
LysE	539.254	487.95	460.422	633.537	468.624	407.375	329.181	298.351	0.522426	8.03964	11.1173	0.00686021	0.960773
pon	4.59674	4.69588	3.83708	3.9648	5.59836	5.77471	6.42606	5.18092	-0.402815	3.70941	10.9246	0.00721826	0.960773
CG6839	45.6454	38.9306	44.3628	33.9013	26.3663	35.2577	21.6119	30.6721	0.539442	5.52316	10.9215	0.00722425	0.960773
CG30340	4.31031	3.01422	2.76978	4.08254	2.74419	1.52679	2.06661	2.33145	0.73708	1.83988	10.8057	0.00745036	0.960773
PGRP-SC1a	63.8668	59.2079	96.9095	61.5449	45.9474	58.1549	42.6892	45.6274	0.57324	5.12778	10.6401	0.00778869	0.960773
CG14817	45.4852	30.3048	48.6569	36.447	24.1765	24.1993	34.6421	27.3683	0.568768	4.96954	10.2591	0.0086391	0.960773
CG13563	0.554184	1.02491	0.639476	0.670511	0.907995	1.44143	1.29804	1.4969	-0.807702	1.13686	10.1757	0.00883979	0.960773
CG4686	1.83605	1.72372	2.27215	1.90594	1.24086	1.0807	1.32849	1.40638	0.635891	0.975879	10.0339	0.00919414	0.960773
c(3)G	1.72961	1.51184	1.2561	1.7447	2.05306	2.09306	2.40405	2.37109	-0.489852	2.33502	9.8833	0.00958909	0.960773
Sar1	108.867	95.4594	111.289	101.958	85.7016	81.1462	84.6131	91.3674	0.309276	7.43281	9.87184	0.00961998	0.960773
Sodh-1	14.1223	10.1238	12.0102	13.3649	11.1613	8.29897	5.85253	8.3497	0.586786	3.85963	9.831	0.00973098	0.960773
Drat	26.0368	14.7632	17.8368	18.4141	12.3245	14.2863	12.6443	14.9604	0.53269	5.41728	9.77225	0.00989339	0.960773
BG642312	8.59729	4.40551	7.06662	7.08819	4.77799	4.41918	4.16024	3.8479	0.683091	1.6106	9.66023	0.0102121	0.960773
CG7542	2936.89	2160.57	2806.74	3020.11	2393.78	2008.06	1661.56	2008.39	0.463339	11.4237	9.51449	0.0106453	0.960773
Jon74E	42.3624	22.1685	20.4793	22.5251	22.8582	13.027	11.6431	13.5019	0.847074	4.25777	9.55292	0.0108478	0.960773
CG9184	1.11919	1.08119	0.683704	1.01515	1.96482	1.33689	1.61242	1.89794	-0.772137	0.442368	9.41629	0.0109497	0.960773
Bace	453.714	438.684	522.091	541.677	429.129	410.884	299.304	348.305	0.420454	9.25232	9.40308	0.0109914	0.960773
1295016..1296989	3.9788	4.67364	5.01867	4.48698	3.78594	3.48446	3.01965	3.69964	0.399689	2.99897	9.38019	0.0110642	0.960773
FucTA	3.50561	4.3457	3.51752	3.71487	4.61106	4.71838	5.77	4.76936	-0.374499	3.87112	9.29106	0.0113531	0.960773
CR46012	34.1616	29.0609	32.2295	26.7707	36.1689	37.6069	43.6657	43.9771	-0.377309	4.39522	9.26605	0.0114357	0.960773
LysB	467.137	382.852	396.827	547.964	401.115	329.684	297.821	211.147	0.560616	7.8587	9.02611	0.0122667	0.960773
CG11638	1.39488	1.27266	1.19227	1.23347	1.73458	1.64207	1.7033	1.99823	-0.449716	1.92891	8.98509	0.0124159	0.960773
CG5080	20.5103	17.8927	30.8735	22.5796	16.8851	17.7546	17.1916	14.7471	0.489648	5.69991	8.97091	0.012468	0.960773
RpLP1	230.868	217.967	266.878	258.503	219.798	194.988	182.648	197.426	0.318809	7.4098	8.87315	0.0128342	0.960773
Pvf2	2.66246	3.29868	3.59589	2.58845	4.82518	3.68632	4.54578	3.88139	-0.455877	2.94347	8.86123	0.0128798	0.960773
CR43916	88.3191	66.9096	102.584	103.429	68.241	66.6593	73.3161	64.4733	0.430984	4.92498	8.81684	0.013051	0.960773
CG32669	19.9722	15.8866	21.1537	19.2452	16.7245	15.4794	14.8073	13.2989	0.364313	5.3513	8.79078	0.0131529	0.960773
CG13926	6.65747	6.63357	9.19829	6.49222	5.2287	5.02717	5.7762	5.05072	0.48167	2.20215	8.68175	0.0135894	0.960773
CG32365	2.76807	3.45154	3.8196	3.47656	1.87168	3.05493	2.33589	2.40509	0.504169	3.01029	8.65918	0.0136818	0.960773
CG33337	2.42187	2.07325	2.00107	1.7698	2.59338	3.06222	2.56304	3.97943	-0.537457	2.46025	8.61388	0.0138698	0.960773
CG43232	1.56115	1.87415	3.22359	1.3487	0.613054	1.34208	1.0062	0.986978	1.03023	0.272035	8.59024	0.0139691	0.960773
CG34056	1.00056	1.00194	1.43614	1.50519	0.819366	0.646388	0.80459	0.773887	0.720427	0.43924	8.56133	0.0140918	0.960773
CR45814	6.84607	6.82149	9.45887	6.63133	5.37682	5.16958	5.93983	5.1938	0.479493	2.20091	8.55592	0.0141149	0.960773
CG10075	5.60942	4.83531	4.52695	4.45056	3.27377	4.25376	2.65823	3.47237	0.530883	1.9578	8.54535	0.0141601	0.960773
Mal-A8	573.209	481.255	672.149	687.526	451.518	510.608	404.26	480.537	0.411352	9.91881	8.41183	0.0147469	0.960773
Tmem18	5.55057	3.34752	6.07916	4.67947	2.63223	2.99021	3.63344	3.43538	0.653288	1.48026	8.33561	0.0150949	0.960773
Faa	0.760829	0.40833	0.258213	0.845928	0.166961	0.395141	0.126476	0.17203	1.41011	-0.69556	8.30923	0.0152176	0.960773
ATP6	277.374	244.989	308.811	278.888	140.067	192.739	264.037	198.914	0.503263	7.33303	8.26501	0.0154261	0.960773
CG14401	5.29591	6.73971	7.7633	7.55218	5.2148	5.33802	5.09577	5.32943	0.405408	3.08988	8.24586	0.0155174	0.960773
cactin	42.2069	47.9056	43.6406	42.3403	51.5622	53.6476	55.8135	53.2846	-0.260253	6.8312	8.21171	0.0156819	0.960773
SLC22A	14.7172	17.2123	14.3073	15.5815	17.7228	20.8306	22.6557	17.9824	-0.334722	5.20089	8.20409	0.0157189	0.960773
Sas-4	3.5407	4.18301	3.71897	3.97391	4.59348	4.8695	5.04574	4.90741	-0.309598	3.61519	8.19791	0.015749	0.960773
Cyp6a2	23.0603	15.2338	15.8692	18.8401	16.5467	14.2219	10.1456	10.3864	0.536223	4.70647	8.18065	0.0158333	0.960773
Tim9a	9.98315	7.19674	9.52857	8.82788	7.4716	5.93053	5.92109	6.63249	0.478257	2.00932	8.17682	0.0158521	0.960773
CR43670	1.84943	1.7418	1.92754	2.13658	2.47601	2.739	2.44463	2.57984	-0.395821	2.27208	8.14548	0.0160069	0.960773
CG32939	3.62258	3.64944	4.2672	4.32955	2.81549	3.19839	3.27026	2.70757	0.42674	2.15807	8.14426	0.0160129	0.960773
MFS1	17.1624	11.0993	10.9061	6.60965	7.57559	8.62569	3.61419	4.74809	0.924168	3.9104	8.2482	0.0162607	0.960773
mEFTu2	4.27445	3.22166	4.5463	5.06576	3.55323	2.96992	2.83606	3.23249	0.467263	2.68147	8.03837	0.0165498	0.960773
CG12535	2.43068	2.41285	3.46109	2.78562	1.74103	1.98725	2.49576	2.03681	0.447956	3.99112	7.98312	0.0168384	0.960773
16340723..16349821	0.104841	0.130727	0.0725857	0.0764844	0.185781	0.163531	0.217271	0.120897	-0.805554	0.363511	7.93486	0.0170955	0.960773
CG6295	743.163	347.876	621.647	576.792	474.45	412.656	261.924	246.443	0.74432	8.97757	7.94361	0.0174614	0.960773
Kyat	8.79416	7.06322	11.3622	9.4241	6.27014	7.67448	6.81275	6.88467	0.430457	3.91959	7.815	0.0177547	0.960773
dome	54.8755	61.7134	39.3941	49.4711	67.6959	69.0208	65.6401	66.3788	-0.364763	8.17291	7.80471	0.0178128	0.960773
CG14545	0.312897	0.785069	1.35395	1.08946	1.89685	1.45036	2.94748	1.57858	-1.13471	0.289287	7.80403	0.0178166	0.960773
Rrp1	15.0079	16.7179	13.693	16.0708	17.2987	21.3285	20.6893	18.3509	-0.314357	5.47258	7.77692	0.0179705	0.960773
Agpat1	2.86705	3.51501	2.50002	1.65297	3.16012	5.10582	5.76978	3.37346	-0.702989	3.77475	7.76309	0.0180784	0.960773
pinta	9.2478	7.83169	9.35771	9.43572	6.59034	7.70434	6.25432	7.79302	0.363608	3.43777	7.7512	0.018118	0.960773
epsilonTry	640.983	486.211	720.491	629.959	528.636	448.723	447.754	515.085	0.379069	8.84281	7.74956	0.0181275	0.960773
CG12007	70.083	66.1809	47.8007	59.1694	80.215	79.3306	79.6611	74.372	-0.34263	7.00997	7.74347	0.0181627	0.960773
id-Dmel_CG34356	0.160431	0.16966	0.100976	0.123326	0.210836	0.218907	0.199211	0.26629	-0.662052	0.719631	7.70054	0.0184129	0.960773
CR43425	0.477694	0.575632	0.769619	0.878701	0.302617	0.445632	0.509417	0.398417	0.725181	0.984218	7.68198	0.0185224	0.960773
CG12096	1.53268	1.32574	2.04419	1.87126	1.15099	1.21262	1.2469	1.33895	0.475418	2.24548	7.68106	0.0185278	0.960773
CG43064	91.8509	141.217	123.132	112.1	127.089	167.481	171.265	165.551	-0.410331	8.10225	7.67333	0.0185737	0.960773
LysD	941.624	804.293	1043.51	1244.83	875.979	804.635	696.112	489.928	0.519592	8.69591	7.64643	0.0187342	0.960773
CG10863	95.8034	82.0005	106.606	103.353	78.0764	83.3736	78.3363	79.9977	0.302827	6.59245	7.63081	0.0188283	0.960773
pnut	109.051	97.3963	86.6816	91.4825	122.77	113.412	127.256	115.353	-0.291556	8.35082	7.59526	0.0190444	0.960773
onecut	0.235822	0.258189	0.174154	0.197063	0.378294	0.308148	0.382086	0.271939	-0.603027	0.944007	7.58185	0.0191266	0.960773
Phae1	145.971	108.771	140.535	134.974	115.204	104.561	89.4772	113.78	0.351913	7.21901	7.53275	0.0194316	0.960773
sens	0.441101	0.43796	0.778453	0.774376	1.05268	0.824719	1.46652	0.89763	-0.780552	1.07369	7.52986	0.0194497	0.960773
DAAM	0.500437	0.596358	0.329975	0.528321	0.847737	0.739404	0.586856	0.750794	-0.553814	1.94911	7.52855	0.019458	0.960773
alpha-Est1	21.8678	17.7652	21.0163	26.4778	19.3473	17.7997	16.0562	13.141	0.419113	5.35166	7.50728	0.0195921	0.960773
ap	0.750791	1.34986	0.764418	1.01783	1.16017	1.77417	1.52542	1.45003	-0.583535	2.41988	7.49301	0.0196827	0.960773
438	150.545	176.338	210.98	213.524	137.161	147.393	148.833	153.739	0.378663	3.42958	7.48431	0.0197382	0.960773
PIG-Wb	15.292	15.851	16.6282	16.5356	13.9925	13.6546	13.2341	14.0839	0.250401	5.03912	7.4729	0.0198113	0.960773
Cyp6t1	15.2489	13.0675	15.5813	18.7141	13.0754	12.7713	12.7534	11.9831	0.332579	4.66349	7.46927	0.0198346	0.960773
piwi	0.124171	0.254904	0.322384	0.319112	0.472883	0.33803	0.838276	0.447464	-1.01554	0.333462	7.46426	0.0198668	0.960773
CG34149	1.30515	1.3261	1.16374	1.09182	0.41497	0.602351	0.866199	0.940649	0.812662	0.12626	7.44951	0.0199621	0.960773
CG8320	8.23317	7.8962	9.5751	8.44843	6.59034	5.89542	6.80905	7.66257	0.365082	2.9178	7.39206	0.0203383	0.960773
CG7322	4.8842	2.97081	3.28761	3.36578	3.08428	2.38074	2.34837	2.39566	0.533541	1.97247	7.34151	0.0206764	0.960773
CG7183	13.622	14.4875	14.6179	14.4201	15.9997	18.6098	17.1598	17.9959	-0.264686	5.23241	7.33754	0.0207033	0.960773
ORMDL	37.7427	30.3032	42.3538	36.4205	31.3285	26.3253	30.7981	29.5594	0.340486	4.48513	7.32105	0.0208152	0.960773
CG11162	15.0168	9.97579	11.1793	17.2107	10.5202	10.3868	9.58259	7.18202	0.528712	3.39713	7.29547	0.0209903	0.960773
CG7328	2.82044	1.61869	1.67975	3.03208	1.35767	1.42583	1.56411	1.55188	0.658491	1.42903	7.29516	0.0209925	0.960773
wek	3.66	4.12417	3.39307	3.11198	4.49297	4.83334	4.4938	4.53918	-0.337963	3.06255	7.27681	0.0211192	0.960773
abd-A	0.6038	0.678021	0.830714	0.901002	0.389861	0.594609	0.557838	0.557912	0.541505	1.83244	7.26953	0.0211697	0.960773
6426911..6431563	2.21419	1.85806	3.94284	2.84176	1.74638	1.70754	1.79607	2.12118	0.582284	3.41586	7.2225	0.0214997	0.960773
CR41440	2.81453	3.44209	3.8696	2.44249	4.30047	5.07567	5.41536	4.20084	-0.573803	1.10928	7.20676	0.0216115	0.960773
CG10495	3.75734	3.34345	4.33561	3.83014	3.20143	2.744	2.68731	3.14261	0.398595	2.23075	7.1758	0.0218334	0.960773
Caf1-180	7.51108	12.1415	8.66707	10.1949	11.3843	14.5825	13.2617	12.3951	-0.40169	5.50945	7.16902	0.0218824	0.960773
CG18404	420.658	327.447	433.958	360.734	366.48	299.156	270.521	294.896	0.352384	7.71955	7.16868	0.0218848	0.960773
CG6903	2.92824	3.26117	3.71204	3.7473	2.4874	2.8888	2.93969	2.2987	0.385318	2.82349	7.16274	0.0219278	0.960773
COX2	211.911	195.332	294.233	238.15	129.19	147.874	223.101	176.739	0.496781	7.11674	7.13137	0.0221567	0.960773
CG31957	13.7253	12.621	15.6304	16.9783	12.1977	10.7224	11.5753	12.6371	0.347329	3.56122	7.11625	0.0222681	0.960773
ptc	2.81064	3.20019	3.44258	2.89919	2.40647	2.90867	2.26782	2.41311	0.328173	3.95366	7.10923	0.02232	0.960773
CG9410	3.76726	3.34976	4.78913	3.43011	2.5607	2.90332	2.97733	2.82252	0.467004	1.75263	7.08826	0.022476	0.960773
CG9515	2.53397	2.73484	2.60303	1.90599	1.5275	2.10083	1.39726	1.66296	0.568547	1.123	7.08146	0.0225268	0.960773
CG31697	16.1169	17.9723	13.236	15.3592	20.6287	19.6566	28.1757	17.5806	-0.432911	3.61643	7.08036	0.0225351	0.960773
CG14687	5.50023	4.97906	7.04091	4.78773	3.84733	4.24916	3.80493	4.45965	0.469228	1.86195	7.07282	0.0225917	0.960773
CG30160	21.6635	21.2089	34.4749	32.7576	23.4019	19.7921	18.171	19.442	0.471474	4.33772	7.05827	0.0227013	0.960773
trnL1	23.126	12.7476	16.1223	23.006	8.98682	12.3359	11.8	11.5746	0.767434	0.0646938	7.05498	0.0227262	0.960773
CR43723	1.59832	1.15126	0.776552	1.25529	1.93526	1.80728	1.849	2.02095	-0.640938	0.8664	7.04305	0.0228168	0.960773
fne	0.147028	0.115852	0.181224	0.136293	0.0529803	0.0708065	0.0975794	0.1156	0.802988	0.19555	6.99394	0.023194	0.960773
alphaTry	4867.05	3621.32	4747.83	4548.86	4001.87	3514.61	3050.54	3545.62	0.360126	11.7456	6.99029	0.0232224	0.960773
CG5674	18.8469	23.1596	13.965	19.528	24.4308	28.2164	23.7071	23.5408	-0.381772	6.20675	6.93482	0.0236581	0.960773
Obp44a	3.19164	3.07375	4.97867	4.11585	1.46078	2.2439	3.45192	2.38548	0.706848	1.76824	6.92656	0.0237239	0.960773
grk	1.18457	1.26652	1.68724	1.60192	1.08752	0.817078	1.16816	0.853741	0.570397	1.09187	6.91827	0.0237901	0.960773
CG3630	1.97271	2.17125	2.54731	1.96248	1.47479	1.61731	1.93202	1.44434	0.441868	1.96286	6.89991	0.0239374	0.960773
CG9804	4.33351	2.88024	3.77518	3.31178	2.56952	2.20443	3.00078	2.59237	0.488718	1.7976	6.89112	0.0240084	0.960773
rdgBbeta	10.2619	9.57266	7.5933	8.28599	12.7896	11.7215	11.0105	10.392	-0.337257	3.82281	6.88289	0.0240751	0.960773
sip1	7.28613	6.17807	5.41142	6.94111	9.15298	8.13967	7.72548	7.73813	-0.317982	4.35042	6.81534	0.0246308	0.960773
CR45392	43.5325	40.661	38.3759	34.6575	46.3277	42.3538	58.5329	56.5564	-0.350249	4.56364	6.81526	0.0246314	0.960773
CG14274	2.64985	4.13166	3.5825	3.10824	3.65173	4.85373	6.81783	4.59873	-0.54298	2.75933	6.81104	0.0246667	0.960773
19914900..19922254	0.121054	0.173558	0.289346	0.240851	0.0887074	0.106879	0.154758	0.116328	0.837468	0.309884	6.76583	0.0250478	0.960773
CG10877	12.9042	12.2136	12.6173	15.3567	12.7849	11.1092	9.31557	9.15546	0.350965	4.24387	6.73654	0.0252987	0.960773
ear	20.6433	24.5306	17.0764	20.6631	24.6964	29.3068	25.3195	25.3925	-0.314563	6.54676	6.72556	0.0253935	0.960773
CAH7	24.491	20.8798	29.295	28.3581	21.6682	23.1239	17.0822	19.4324	0.366781	5.77815	6.71147	0.0255157	0.960773
Dpck	18.0213	13.0458	18.9482	17.7202	13.8224	12.2558	14.4853	12.9716	0.364728	3.80015	6.69966	0.0256187	0.960773
mRpL17	5.1541	3.56006	3.9985	4.66388	4.01938	2.75092	3.07218	2.88219	0.476094	2.05999	6.67951	0.0257956	0.960773
betaTry	1956.52	1507.78	1642.03	1891.85	1652.84	1381.46	1083.62	1358.37	0.380196	10.7073	6.61767	0.0263479	0.960773
CG12877	20.0573	18.4248	16.1445	16.2936	21.7542	23.1855	21.5667	20.7034	-0.274195	6.00581	6.60385	0.0264732	0.960773
23665557..23666062	1.31969	2.23609	1.37777	2.6882	5.39209	2.16387	4.32139	2.7175	-0.903058	0.55525	6.59624	0.0265427	0.960773
CG30010	5.92904	4.47266	6.19179	5.60172	4.57205	4.56215	3.55701	4.20156	0.417812	2.24846	6.57962	0.0266949	0.960773
CG34001	24.106	22.9327	31.0039	24.6815	23.1897	19.2745	20.2583	20.2498	0.332832	3.77527	6.56255	0.0268522	0.960773
phr	10.4325	8.13334	14.1811	9.9607	8.43456	7.37159	8.51909	8.24057	0.416302	4.21799	6.54269	0.0270368	0.960773
CG6565	3.25224	3.44103	2.83824	2.75958	2.72733	2.3647	2.57445	2.12729	0.352177	2.69743	6.53229	0.027134	0.960773
Ugt303B1	10.4547	13.4167	10.227	10.7244	13.4281	14.9477	13.9034	13.3664	-0.289379	4.46722	6.52568	0.0271961	0.960773
COX3	2697.49	2168.68	2513.34	2178.88	1656.97	1900.47	2043.57	2116.24	0.332805	10.7371	6.51503	0.0272964	0.960773
id-Dmel_CG5878	0.090613	0.0953919	0.0482579	0.131747	0.162519	0.141543	0.137884	0.207642	-0.793182	0.292842	6.47697	0.0276585	0.960773
foxo	18.1781	15.0539	12.7845	16.3145	11.8267	14.2685	12.0033	12.4151	0.327204	5.86762	6.46004	0.0278215	0.960773
CR44134	5.45112	3.64721	4.78045	4.04905	3.25374	2.75935	3.79984	3.28268	0.477754	1.78783	6.45182	0.027901	0.960773
mwh	9.77324	13.4578	9.22906	10.9953	9.27117	10.0897	6.70757	7.28678	0.404276	5.51239	6.43951	0.0280206	0.960773
sli	9.62079	13.4743	8.03426	10.7122	13.4561	13.6754	14.6249	12.8003	-0.361159	6.85499	6.41362	0.0282743	0.960773
5458116..5466659	0.260519	0.308998	0.489571	0.533145	0.298509	0.282588	0.245407	0.203855	0.649255	1.51409	6.3796	0.0286117	0.960773
Swip-1	22.5323	27.4989	23.2778	24.6263	28.8912	30.1276	30.8234	28.454	-0.249631	5.65217	6.34131	0.0289973	0.960773
alpha-Man-Ia	6.88876	9.38732	6.28823	7.13567	9.0529	9.75031	10.2844	8.7772	-0.328474	5.84902	6.33328	0.0290791	0.960773
Tsp42Eb	260.378	271.672	375.405	380.696	296.085	237.938	206.317	252.085	0.402042	7.94773	6.33294	0.0290826	0.960773
CG7966	6.33105	7.08061	8.20093	10.0771	5.4475	6.09459	5.96381	6.86891	0.401404	3.45693	6.33142	0.029098	0.960773
sta	416.537	334.46	488.268	475.657	359.846	312.474	352.079	355.195	0.3397	9.01784	6.32022	0.0292125	0.960773
FipoQ	1.07357	1.01448	1.41577	1.068	1.04894	0.530352	0.84275	0.626366	0.609311	1.27723	6.31641	0.0292516	0.960773
Mal-A7	109.919	77.5856	67.091	92.9205	80.1719	67.3919	44.1203	60.6301	0.488631	7.67275	6.28461	0.0295801	0.960773
Cyp303a1	4.03895	2.69612	5.01603	4.1088	2.51128	2.63925	3.60047	2.6533	0.499951	3.25852	6.28163	0.0296111	0.960773
CG6659	53.6492	46.2288	46.841	53.9802	50.8373	39.5937	34.9575	38.3234	0.320046	7.30911	6.27469	0.0296834	0.960773
CG8578	48.0941	48.5791	42.2651	42.1665	52.5249	55.7918	55.1989	53.6976	-0.23881	6.55081	6.27185	0.0297132	0.960773
CR45874	262.727	211.325	343.636	297.708	226.076	205.239	226.935	225.413	0.361825	7.7719	6.26533	0.0297814	0.960773
id-Dmel_CR45109	0.184337	0.13665	0.132942	0.17192	0.166549	0.345849	0.249614	0.287854	-0.721353	0.290785	6.26252	0.0298109	0.960773
lrRNA	2042.27	1228.01	2395.07	1714.79	1196.94	1206.07	1664.54	1197.9	0.513751	11.0354	6.24817	0.0299621	0.960773
CG31286	17.0434	9.83936	11.0436	14.8335	12.241	9.44501	7.56193	8.94712	0.493812	4.38839	6.24084	0.0300395	0.960773
Oatp58Dc	0.283732	0.13868	0.198778	0.524196	0.36858	0.554696	0.448638	1.65541	-1.37441	0.767775	6.25918	0.0303499	0.960773
CG9864	36.4237	32.0074	25.7452	23.9099	25.7147	24.8557	20.7267	21.9981	0.364748	5.53665	6.20623	0.030409	0.960773
CG10132	0.923064	1.05273	1.21393	1.03306	0.854563	0.850933	0.837554	0.808761	0.355917	2.16838	6.2057	0.0304147	0.960773
Mfap1	56.5259	47.9506	56.1507	53.4493	55.8925	65.8639	76.398	70.6331	-0.3046	6.66634	6.19744	0.0305037	0.960773
Ski6	2.66067	1.18416	2.6583	2.51775	1.69466	1.2605	1.40599	1.24722	0.708983	0.884604	6.16779	0.0308258	0.960773
Tom40	22.8363	22.3131	20.4526	22.8235	19.2427	17.8647	19.1354	20.0693	0.23655	5.62668	6.14495	0.0310767	0.960773
mad2	3.26534	3.22748	3.27448	2.51364	2.17529	1.47581	2.30695	2.57753	0.549137	1.1282	6.13684	0.0311664	0.960773
CR45869	8.8668	6.83453	12.3483	10.0375	8.34089	6.00639	5.2563	6.83121	0.550762	1.76975	6.13382	0.0311999	0.960773
vih	10.1216	10.9191	9.97503	10.3283	13.2482	13.7689	11.5805	11.7301	-0.259749	4.07256	6.12895	0.0312539	0.960773
PGRP-SC1b	21.3659	21.2531	31.9526	22.5212	16.7076	24.0398	16.3301	14.565	0.462204	5.12501	6.12862	0.0312577	0.960773
AGO2	175.972	339.748	163.6	219.639	280.864	382.573	329.021	318.222	-0.525493	10.1574	6.12081	0.0313445	0.960773
jet	5.18663	4.99172	6.64144	5.42098	4.40868	3.74846	5.0507	4.33221	0.36637	2.86528	6.11911	0.0313635	0.960773
CG46466	4.22751	3.83311	3.1511	3.39581	2.88973	3.17609	2.79502	2.24571	0.419389	1.98418	6.09504	0.0316337	0.960773
CG10469	5.72189	6.03621	6.0523	6.43338	4.25253	4.89401	5.53035	4.86847	0.333594	2.56171	6.07895	0.0318158	0.960773
sca	0.0837676	0.213997	0.0676619	0.0333332	0.27344	0.133126	0.355089	0.225393	-1.25236	-0.463956	6.07002	0.0319174	0.960773
AOX3	60.5434	59.957	62.0034	67.0664	56.5047	53.9095	53.3547	53.6319	0.223437	8.05804	6.06167	0.0320127	0.960773
scra	4.85518	6.93492	4.48853	5.87566	7.36911	7.07078	6.84349	6.96753	-0.328036	4.8094	6.06114	0.0320188	0.960773
CR44969	43.1761	40.5401	48.8191	56.356	37.4197	39.6008	39.7973	39.3613	0.298473	5.52097	6.05948	0.0320378	0.960773
id-Dmel_CG30483-2	0.372866	0.315301	1.02841	0.59711	0.309585	0.417529	0.312687	0.23596	0.876476	1.67198	6.05017	0.0321446	0.960773
CG14102	0.247577	0.169412	0.24997	0.431013	0.360785	0.519145	0.670497	0.475824	-0.858765	-0.205295	6.01545	0.0325469	0.960773
Ac3	0.301259	0.28608	0.319247	0.287464	0.338309	0.417974	0.619692	0.419477	-0.565238	0.997133	5.98562	0.0328975	0.960773
SmydA-3	0.947236	0.852231	1.32073	1.09938	0.699388	0.499469	0.941863	0.695335	0.595718	1.12825	5.98291	0.0329294	0.960773
Prosalpha6	31.2336	32.9705	38.098	34.8557	30.7097	26.553	29.8138	29.7572	0.255703	5.08957	5.97369	0.0330389	0.960773
Phae2	436.359	355.123	371.655	360.487	330.333	337.142	241.954	328.639	0.324552	8.63113	5.9685	0.0331006	0.960773
CG10428	8.01162	8.94067	9.01544	8.23353	6.59205	7.27811	7.71843	7.38072	0.262402	3.92963	5.95691	0.0332391	0.960773
Hexo1	96.689	74.3601	127.9	109.951	89.8548	79.8817	73.3467	75.6112	0.386302	7.6544	5.94156	0.0334234	0.960773
RpS9	270.253	213.713	326.408	290.23	235.096	209.292	225.33	225.184	0.324471	7.9907	5.93461	0.0335074	0.960773
cpb	110.386	145.933	115.677	114.937	137.827	154.892	154.87	149.325	-0.271937	8.02637	5.93243	0.0335338	0.960773
CG10508	0.350072	0.141954	0.325404	0.309561	0.181385	0.120198	0.192363	0.130824	0.868779	-0.376846	5.92607	0.0336108	0.960773
CR44896	2.32487	1.36848	1.73076	2.16359	3.84695	4.03906	2.4726	2.37824	-0.721142	0.192628	5.9196	0.0336895	0.960773
CG31821	38.8818	34.8632	51.7763	38.5468	31.553	35.71	33.8479	31.7379	0.329066	5.7265	5.89962	0.0339338	0.960773
CG4611	5.58732	6.60768	8.29163	6.92329	5.3825	5.30773	5.9028	5.64105	0.325028	3.80911	5.88637	0.0340969	0.960773
Mf	20.7205	21.9232	26.5283	21.945	17.6226	22.551	15.2653	18.1518	0.331852	6.77113	5.88617	0.0340994	0.960773
Pdxk	123.633	112.544	152.491	131.069	105.42	104.353	115.463	110.735	0.278282	7.57167	5.86446	0.0343688	0.960773
Mst85C	4.62954	5.84997	6.82177	6.07583	3.95285	5.10451	4.11531	5.03363	0.382211	2.93892	5.83616	0.0347238	0.960773
CG42807	407.61	449.484	543.588	397.516	471.512	527.729	744.153	683.885	-0.410121	10.1153	5.80425	0.0351295	0.960773
CG32107	17.3138	26.1884	19.7095	20.5744	22.6847	26.0735	29.0603	29.6531	-0.338351	6.56269	5.79712	0.035221	0.960773
bic	385.939	308.997	430.195	374.565	342.719	270.252	295.159	321.38	0.312832	9.04473	5.79243	0.0352812	0.960773
RpL11	203.921	179.149	278.384	246.347	189.137	161.161	191.798	185.144	0.345573	7.70186	5.76548	0.0356302	0.960773
Dph5	26.132	21.1416	26.8685	24.2858	22.9785	18.4925	19.916	21.0755	0.280985	4.6773	5.75654	0.0357468	0.960773
CG4829	13.8893	14.7871	21.2065	15.4186	12.6107	14.0171	12.9623	12.9758	0.336971	5.67392	5.74268	0.0359287	0.960773
Mp20	136.048	111.702	206.606	146.287	104.111	111.292	127.145	115.104	0.4175	6.97417	5.74095	0.0359514	0.960773
CG15096	75.3671	53.8547	44.0172	42.5085	38.8407	42.0164	34.5987	46.4536	0.438791	6.7012	5.74041	0.0359586	0.960773
DNApol-alpha73	1.58529	1.74127	1.66944	1.30146	1.95222	2.22859	2.08777	2.01149	-0.371622	1.93602	5.72546	0.0361561	0.960773
Pep	167.829	164.013	151.867	175.025	182.772	199.621	208.764	199.615	-0.240174	8.98208	5.71237	0.0363301	0.960773
CG5532	3.70904	3.79672	4.95839	5.48969	2.82644	2.95524	3.57911	3.69464	0.481732	1.47657	5.69703	0.0365353	0.960773
CG44325	13.2348	10.8939	18.4194	15.1899	12.1601	11.2462	10.823	11.3852	0.365577	5.15571	5.68964	0.0366347	0.960773
CG5011	206.573	229.774	266.318	287.057	189.478	215.717	214.033	204.453	0.28829	6.96408	5.64011	0.0373094	0.960773
Npc2b	5.38017	5.41219	9.3521	6.00414	4.02068	4.96333	4.64575	5.3027	0.486975	2.39351	5.63047	0.0374424	0.960773
CG9512	3.53631	3.63138	3.1389	2.99099	3.60525	4.29781	4.43709	4.41636	-0.310298	3.07117	5.62393	0.037533	0.960773
CG15170	11.5125	11.0441	11.6398	11.6369	9.97757	10.2625	10.4437	8.21726	0.260799	4.19127	5.61846	0.037609	0.960773
CG33116	12.8737	17.2662	14.2269	12.681	15.5366	19.1561	22.6084	16.4948	-0.349699	5.36131	5.61277	0.0376881	0.960773
RagA-B	88.3032	101.253	89.4891	91.0354	104.135	108.371	110.518	114.328	-0.218079	7.15044	5.59721	0.0379059	0.960773
20272782..20277925	15.1759	14.0886	14.8794	13.9656	20.4724	13.2515	23.9152	18.9495	-0.373235	6.43579	5.59037	0.0380021	0.960773
Slc45-1	1.64027	1.34776	1.2286	1.26915	1.11827	1.21107	0.903582	0.534629	0.566234	1.96271	5.57644	0.0381988	0.960773
CG31823	3.98894	3.92891	5.12591	4.12607	2.81134	3.44181	3.71486	3.5283	0.369352	2.44358	5.56303	0.0383894	0.960773
CG18493	1907.57	2112.27	1965.18	1760.49	2130.65	2420.31	2522	2382.52	-0.265023	11.7163	5.55865	0.038452	0.960773
6470819..6476295	0.197396	0.254258	0.167483	0.219475	0.173272	0.143526	0.10938	0.12832	0.62111	0.0212743	5.55543	0.038498	0.960773
CR44847	4.78538	7.05915	3.76726	5.47242	7.25771	9.00289	6.65638	6.83338	-0.472298	2.19595	5.55427	0.0385146	0.960773
CR44145	1.36575	0.921012	1.91854	1.29959	0.719953	0.812622	1.20262	0.570622	0.752231	0.301312	5.55231	0.0385427	0.960773
CG12512	16.2242	10.1414	12.7904	13.3063	9.67374	12.4382	9.30403	9.75914	0.374592	4.59372	5.5449	0.038649	0.960773
CG43341	1.89566	1.67376	1.12899	2.00749	1.16915	1.18778	1.18087	1.08712	0.56113	0.618605	5.54098	0.0387053	0.960773
NC2alpha	7.15781	7.42328	8.97248	7.14629	5.76321	6.97892	6.30605	6.11137	0.309729	3.1191	5.5401	0.038718	0.960773
srRNA	1.53732	1.25497	3.45447	1.85131	0.981004	1.14299	1.60058	0.699775	0.884909	0.354573	5.53897	0.0387343	0.960773
H2.0	3.8265	3.24682	6.24781	4.58701	3.39033	3.81763	2.70341	2.99685	0.495012	2.69221	5.51983	0.0390113	0.960773
CG6712	62.0017	54.2235	49.4354	50.3385	70.6118	62.1806	65.1314	63.2865	-0.249219	6.31639	5.50985	0.0391567	0.960773
CG8281	9.36104	9.70035	10.6889	9.72582	8.43421	7.72542	8.03524	9.20698	0.264854	3.57497	5.50931	0.0391645	0.960773
CG32579	11.0884	14.4075	11.1271	11.3098	15.8342	15.2945	14.8143	13.1017	-0.277378	4.30371	5.50858	0.0391752	0.960773
CG10553	1.19078	0.603576	0.763358	1.38203	1.23397	1.67436	1.2048	3.6024	-0.94342	1.11522	5.47681	0.0396428	0.960773
ClC-a	13.1737	10.2516	11.6765	12.2463	10.3486	10.8497	9.82698	9.01872	0.267001	6.0111	5.47004	0.0397433	0.960773
CG9436	35.5076	36.3149	41.0005	41.8054	35.6197	31.436	29.8848	35.0594	0.252798	5.54755	5.46534	0.0398132	0.960773
Pkg21D	3.92707	4.04347	4.54567	4.21287	5.05182	5.05412	5.26481	4.87395	-0.251414	3.58412	5.46091	0.0398793	0.960773
12558375..12565446	2.26616	1.85427	4.27521	3.81996	2.49514	2.35412	1.54597	1.23575	0.704898	4.13989	5.51418	0.0400061	0.960773
CG30100	33.9682	25.8137	42.5667	36.6564	29.4619	24.6115	28.6958	28.0706	0.352277	4.5781	5.42095	0.0404813	0.960773
CG42372	33.9682	25.8137	42.5667	36.6564	29.4619	24.6115	28.6958	28.0706	0.352277	4.5781	5.42095	0.0404813	0.960773
CG8888	4.98941	4.97686	9.3234	7.94535	5.45207	4.71749	4.5597	5.06299	0.484568	3.33693	5.40861	0.0406695	0.960773
CG9646	42.8142	52.2805	51.8069	47.8505	56.0409	54.4087	61.2852	61.594	-0.237732	7.52139	5.40545	0.0407178	0.960773
CG10970	16.6545	12.5825	22.1774	17.3196	14.4678	13.479	13.173	13.185	0.365612	4.804	5.39648	0.0408554	0.960773
eIF5B	82.9421	93.7195	60.3381	79.1692	92.0562	108.53	98.3175	99.9506	-0.313185	8.62126	5.38391	0.0410493	0.960773
sip2	1.74924	2.54859	2.0654	1.80761	2.32699	2.64585	2.8868	2.86674	-0.370154	2.48518	5.37658	0.0411628	0.960773
id-Dmel_CG42352-7	71.6828	60.0839	63.992	63.9853	90.8574	61.5535	110.666	80.5965	-0.378493	8.81698	5.37088	0.0412514	0.960773
id-Dmel_CG42352-8	83.4023	69.9071	74.4541	74.4463	105.712	71.6169	128.747	93.7734	-0.378451	8.81695	5.37072	0.0412538	0.960773
id-Dmel_CG42352-6	49.6955	41.6544	44.3637	44.3737	62.9956	42.6732	76.7285	55.8822	-0.378502	8.8171	5.37037	0.0412593	0.960773
Dek	62.5897	64.3547	47.0843	56.975	66.9672	82.82	65.9228	71.9614	-0.293846	8.06675	5.36993	0.041266	0.960773
CG4860	31.2732	30.0324	35.4541	28.1588	34.0848	35.1086	46.253	41.4151	-0.304921	5.6179	5.36413	0.0413564	0.960773
CR45485	10.1952	5.88864	7.49496	9.11986	7.62979	6.31547	4.91807	5.5504	0.448703	3.47479	5.35906	0.0414358	0.960773
Had1	10.9588	6.30431	8.02401	9.78551	8.18889	6.76127	5.32741	5.92105	0.44805	3.47778	5.34392	0.0416732	0.960773
CG12259	43.0781	39.8156	43.7007	41.2806	44.461	52.3642	55.0995	50.2741	-0.24478	5.85022	5.33589	0.0417999	0.960773
CG5612	3.58706	2.92621	6.18433	3.02269	2.55829	2.75718	3.06097	2.47374	0.556639	2.33966	5.32548	0.0419649	0.960773
Ranbp16	2.90964	2.97887	3.82161	3.17466	2.63238	2.79387	2.43141	2.84759	0.290801	3.81304	5.32283	0.0420071	0.960773
MED8	5.28319	6.50733	7.92519	6.37264	5.60486	5.0144	5.44331	4.63271	0.357061	2.50838	5.32055	0.0420434	0.960773
CG15673	6.12039	8.2746	6.1314	7.50009	4.33302	4.7651	5.97502	6.5498	0.396406	2.8397	5.31282	0.0421666	0.960773
id-Dmel_CG1981-4	0.743817	2.46007	1.6093	1.29493	3.38188	3.36569	2.36477	2.14434	-0.851196	-0.305724	5.30759	0.0422503	0.960773
CR45212	10.4713	11.1314	6.42943	8.50561	14.0667	13.6557	10.4069	13.0167	-0.458395	1.88448	5.30206	0.0423389	0.960773
Gga	31.138	39.3504	28.2343	33.9119	38.4906	42.3977	39.4222	41.1093	-0.261222	6.43824	5.2952	0.0424492	0.960773
CG31365	11.5754	12.0148	9.66408	11.0547	11.1768	16.3038	13.3926	14.9709	-0.311608	4.87212	5.28704	0.0425808	0.960773
Got1	83.6814	65.8914	80.2251	75.5981	73.2365	62.399	57.6905	65.3433	0.265621	6.96552	5.26985	0.0428598	0.960773
cal1	3.3193	4.07551	3.28008	3.8817	4.39661	4.80904	4.2494	4.29255	-0.262771	3.86754	5.26553	0.0429303	0.960773
CG3819	244.636	214.284	193.575	140.414	126.217	185.744	93.9477	160.864	0.507572	7.92008	5.26843	0.0429488	0.960773
sti	1.3589	2.06001	1.12175	1.88219	1.75482	2.40878	2.26475	2.49116	-0.45199	3.55127	5.2614	0.0429977	0.960773
CG5254	7.23631	4.25783	4.16411	5.11244	4.19385	3.97017	3.86213	3.77648	0.42073	2.95712	5.26072	0.043009	0.960773
CG32647	1.56767	2.03914	2.31006	1.51212	1.9659	2.50167	3.50724	2.37676	-0.457154	3.74381	5.22955	0.0435227	0.960773
CG1673	2.00164	2.42729	1.69573	2.34414	2.3867	4.02666	3.31758	2.24002	-0.476664	2.69539	5.21561	0.0437548	0.960773
Hrb87F	162.668	167.383	131.86	152.915	164.675	211.075	195.508	183.784	-0.273911	8.88325	5.21118	0.0438289	0.960773
CG45078	126.565	121.006	155.06	138.365	112.433	127.336	109.561	111.068	0.257189	7.91455	5.1884	0.0442123	0.960773
CG11912	783.836	614.483	789.002	692.69	686.822	552.148	628.228	526.408	0.293432	9.21098	5.18734	0.0442302	0.960773
CG3961	8.19884	6.0652	4.0616	5.39232	4.90433	5.23722	3.37993	3.70187	0.487203	4.26164	5.17903	0.0443712	0.960773
UQCR-C2	56.0146	52.6894	70.6203	66.3998	54.8804	45.5591	51.1843	54.4441	0.279084	6.57536	5.17835	0.0443828	0.960773
Nmda1	58.5873	58.8302	46.9489	52.1155	68.9199	61.7645	64.6607	63.4379	-0.233479	7.26471	5.16131	0.0446736	0.960773
cpx	0.484746	0.521065	0.260387	0.473917	0.62618	0.632138	0.608837	0.554167	-0.450569	2.58479	5.14836	0.0448962	0.960773
CG7639	8.23563	8.2891	7.48247	8.84834	11.1737	8.90923	9.76681	9.89681	-0.249717	4.06098	5.14782	0.0449056	0.960773
14778097..14782817	0.0808257	0.258102	0.18653	0.268022	0.0628183	0.16651	0.101517	0.0647253	1.01414	-0.39211	5.13402	0.0451443	0.960773
CG30203	0.530523	0.504203	0.931012	0.912603	0.474174	0.605018	0.426869	0.329253	0.667022	0.807343	5.1266	0.0452733	0.960773
st	0.237079	0.0540762	0.0341958	0.471698	0.552777	0.379389	0.362906	0.939772	-1.44212	-0.18447	5.11634	0.0454949	0.960773
ND1	423.942	455.662	776.004	550.095	107.319	262.42	511.67	263.199	0.967633	8.62538	5.41067	0.0455563	0.960773
Cyp4e1	1.61503	1.30979	2.07066	2.01724	1.12132	0.93477	1.67349	1.18985	0.534338	1.43247	5.10096	0.0457224	0.960773
CG12730	26.7898	20.9462	25.7155	22.8555	21.8662	20.1361	20.5971	19.7198	0.251962	5.40417	5.09895	0.0457579	0.960773
CG31516	0.285955	0.243505	0.351962	0.265507	0.373373	0.656425	0.610568	0.32975	-0.762004	-0.485111	5.0909	0.0459002	0.960773
CG12384	898.715	638.64	787.201	820.603	734.629	602.324	580.476	684.483	0.299997	8.78218	5.0893	0.0459285	0.960773
ND-30	25.8686	24.7909	33.7597	31.6008	26.861	21.43	24.4295	23.669	0.292577	4.6999	5.08705	0.0459684	0.960773
Zw	30.7602	27.0138	44.4044	36.28	26.2564	25.5825	25.184	32.3815	0.364636	6.28571	5.07845	0.0461214	0.960773
CG14005	6.15008	5.19553	5.67729	5.16646	4.71615	4.10262	4.42011	5.12199	0.297879	2.83589	5.06613	0.0463414	0.960773
CG1603	2.68566	2.62185	2.20029	2.53814	3.05582	3.08254	3.55448	2.8647	-0.297376	2.75514	5.06596	0.0463444	0.960773
CG8545	36.5642	44.7229	36.2939	36.9859	42.5388	51.5038	44.8341	47.0113	-0.244065	6.9711	5.06289	0.0463996	0.960773
Seipin	17.4462	15.7473	13.9233	15.4531	15.1545	13.8658	12.0987	12.0135	0.260977	4.89002	5.0599	0.0464532	0.960773
zetaTry	131.491	99.6268	113.525	104.487	103.312	94.808	95.3016	89.4763	0.255984	6.62427	5.05673	0.0465102	0.960773
CG14516	4.95685	4.93707	9.83794	6.30364	3.82168	5.48512	4.83275	4.59662	0.497456	4.43554	5.05567	0.0465293	0.960773
Jon44E	34.7572	31.857	42.3916	34.5543	25.9415	34.6463	30.9829	26.3791	0.307247	5.51692	5.04812	0.0466654	0.960773
CG9119	91.8789	48.9037	75.019	66.6073	61.662	49.2467	48.1929	58.2395	0.405544	6.24647	5.03406	0.0469203	0.960773
20272167..20282820	8.26443	8.29183	9.13342	8.42939	11.1261	8.07934	13.588	10.6349	-0.323476	6.68976	5.03253	0.0469482	0.960773
id-Dmel_CR45137	0.0689184	0.0978124	0.0662711	0.121886	0.164262	0.125077	0.122628	0.150853	-0.633398	0.0253789	5.03051	0.046985	0.960773
meso18E	2.01306	1.79919	1.86068	1.76762	1.66674	1.65946	1.4319	1.34229	0.310751	2.40676	5.02519	0.047082	0.960773
22560647..22562376	0.257326	0.318627	0.509023	0.438843	0.47999	0.616672	0.761829	0.618202	-0.682347	-0.109007	5.02157	0.0471482	0.960773
Nha1	35.424	40.7117	40.4482	42.0739	32.9193	33.7409	33.5984	37.8593	0.223102	6.6717	5.01972	0.0471821	0.960773
CG11722	16.9315	13.3756	16.5829	14.6252	14.7897	10.1361	12.1371	12.937	0.325034	3.43274	5.01606	0.0472491	0.960773
CG18262	7.85933	7.24382	5.64494	6.42239	9.87304	7.71791	8.76326	7.88004	-0.307635	3.61169	4.9943	0.0476503	0.960773
CG43373	2.61269	2.31082	2.73807	2.68284	2.58582	1.95387	2.25505	1.77891	0.296737	4.16513	4.99403	0.0476553	0.960773
l(2)37Cb	18.0923	17.5048	11.3718	15.1196	19.2326	20.3897	19.5971	19.3129	-0.315476	5.61696	4.99195	0.047694	0.960773
Dmtn	116.217	141.936	108.772	108.183	126.592	156.066	164.789	140.783	-0.286445	8.98947	4.98752	0.0477763	0.960773
fau	207.966	202.457	254.075	228.535	186.952	210.313	181.396	187.865	0.244698	7.727	4.97808	0.0479521	0.960773
Jheh3	161.009	136.886	138.969	149.997	143.409	130.737	103.318	119.164	0.26644	7.73913	4.97118	0.0480812	0.960773
CG8852	16.708	18.7525	25.1397	19.4443	13.876	19.6687	15.8388	14.4247	0.350002	5.43411	4.96083	0.0482756	0.960773
CG12951	2.07783	2.03117	3.59642	4.06028	1.17657	0.917263	1.8874	2.74548	0.828498	1.02388	4.95292	0.0484249	0.960773
CG3645	3.53677	4.15309	5.44146	4.3003	3.00841	3.52742	3.51671	3.82354	0.351	2.93785	4.94558	0.0485639	0.960773
disp	2.60427	3.55223	1.93828	2.59077	3.82547	3.40875	3.23824	3.47862	-0.361022	3.91472	4.92958	0.0488685	0.960773
CG9676	7.38879	6.59087	6.01385	9.18808	3.96856	4.74709	7.64379	4.78639	0.488077	2.61645	4.89715	0.0494931	0.960773
LysS	6.01063	6.01465	6.18993	8.61556	5.96747	5.47801	4.627	3.91276	0.448928	1.55558	4.89251	0.0495834	0.960773
Syx18	48.7337	44.403	43.1043	39.4648	48.9888	51.5159	53.0941	56.3246	-0.232882	6.11993	4.88403	0.0497487	0.960773
CG7601	11.6	10.8388	12.6514	11.1602	11.0559	9.38821	9.89671	9.24039	0.249525	3.75233	4.88289	0.0497708	0.960773
CG7564	4.60089	5.08673	4.2233	4.14385	5.23384	5.57302	5.1314	5.50977	-0.225373	5.68902	4.87826	0.0498614	0.960773
sand	2.21848	2.84545	2.22601	2.27094	1.96411	1.77419	1.83236	2.14732	0.332504	2.11549	4.86707	0.0500812	0.960773
CG9360	77.5139	47.4281	38.0038	53.9752	40.2584	42.4784	43.2665	39.3253	0.41743	5.63243	4.85239	0.0503713	0.960773
angel	24.8957	22.7613	17.4511	19.7772	30.2834	26.614	27.0071	22.3835	-0.29916	4.87886	4.8368	0.0506816	0.960773
CG3703	7.69476	8.13634	6.08595	5.76648	8.8518	7.49111	10.3566	8.45944	-0.320784	4.29642	4.82141	0.0509903	0.960773
CG11151	364.93	226.708	276.022	292.751	266.532	224.522	242.587	206.812	0.330324	8.18188	4.81703	0.0510785	0.960773
RpS6	351.244	333.114	402.201	405.779	354.315	300.365	305.227	324.363	0.241891	8.69733	4.81569	0.0511056	0.960773
CG32407	71.1707	39.4831	40.8223	52.8829	43.2679	45.8535	33.1079	26.6734	0.484032	5.93033	4.81598	0.051144	0.960773
Srrm1	31.4853	28.1705	23.0109	26.8334	33.2426	33.0617	31.9858	33.2944	-0.240925	6.86256	4.80439	0.0513342	0.960773
CG14881	2.65488	1.81668	1.91467	2.22093	1.80077	1.22528	1.27886	1.85544	0.508723	1.00337	4.80117	0.0513997	0.960773
glob1	16.7359	12.6013	15.6119	14.7739	15.7237	11.0122	10.7203	11.207	0.322502	4.6165	4.79964	0.0514307	0.960773
jub	58.3364	54.6466	42.1622	48.3004	71.3452	62.2653	63.9448	53.6357	-0.279336	7.38214	4.79946	0.0514343	0.960773
CR44366	1.3191	0.65646	0.853304	0.437418	1.04385	1.16464	2.01449	1.42125	-0.763692	0.876616	4.79319	0.0515621	0.960773
4607434..4608150	3.50357	3.64166	2.91694	1.94123	2.48172	2.19273	1.58751	2.04565	0.554722	0.911104	4.78331	0.0517642	0.960773
CG4570	1.64038	3.15446	1.92197	2.10888	2.25954	2.76292	4.6357	3.83173	-0.588816	1.8392	4.76699	0.0521	0.960773
Fkbp12	394.639	330.726	532.064	445.314	349.788	298.755	350.738	380.536	0.329012	7.93273	4.76487	0.0521438	0.960773
polo	1.03504	1.49927	1.10815	1.11459	1.3634	1.7429	1.60825	1.51759	-0.366786	2.05535	4.76289	0.0521848	0.960773
Tat	2.11104	3.14389	3.42998	2.99475	2.15427	2.08952	2.85359	1.97405	0.38683	3.13316	4.76162	0.0522111	0.960773
mag	59.6351	51.6596	75.5206	68.8135	41.7842	61.6619	55.8514	43.3216	0.359167	6.40628	4.74987	0.0524553	0.960773
CG1946	7.99635	4.80684	3.14768	7.18333	5.06331	4.39185	1.9902	2.56996	0.75073	2.48335	4.76673	0.0527242	0.960773
CG8229	29.5745	19.6921	25.2098	22.771	21.2314	17.7063	19.9517	21.4085	0.302525	5.66984	4.73423	0.0527824	0.960773
CG1703	64.6151	70.7514	56.0637	59.9056	69.415	82.554	72.4804	75.7877	-0.233926	7.71988	4.73167	0.0528363	0.960773
CG30043	4.4468	3.41704	2.88108	4.05423	2.97335	3.09715	3.09062	2.89507	0.320686	3.38105	4.73035	0.0528638	0.960773
CG31717	11.1818	9.75564	11.6124	12.8619	9.90723	8.39159	10.8623	8.09252	0.310557	3.24308	4.71076	0.053278	0.960773
tok	0.276199	0.595143	0.352613	0.420919	0.197308	0.33725	0.27125	0.293653	0.601075	0.940282	4.70837	0.0533286	0.960773
RpS3	540.597	511.024	615.119	570.292	510.312	465.278	467.046	503.931	0.225552	9.21195	4.70085	0.053489	0.960773
CG5013	4.31384	3.8762	7.16495	4.68159	3.71849	3.69329	4.18675	3.26609	0.452695	2.10465	4.68471	0.0538346	0.960773
Reepl1	5.88982	5.09416	7.34627	6.4689	4.95334	4.05792	5.5161	5.13643	0.358664	2.39246	4.68189	0.0538953	0.960773
Adi1	168.744	104.873	119.236	127.074	126.664	100.204	90.4167	98.8629	0.348641	6.36088	4.674	0.0540656	0.960773
CG5721	132.277	152.416	141.062	132.777	149.783	171.658	171.49	164.713	-0.212994	7.92663	4.66969	0.0541588	0.960773
857388..860107	0.549454	0.778627	0.49912	0.639643	1.07941	0.980553	0.605682	0.921199	-0.512833	1.08623	4.66356	0.0542917	0.960773
pav	1.15017	1.30268	1.16701	1.26257	1.59056	1.26936	1.5598	1.84846	-0.33575	2.17935	4.66182	0.0543297	0.960773
Mhcl	10.6923	13.4935	11.7404	12.3238	13.873	14.7584	14.8134	13.4602	-0.215314	7.198	4.65811	0.0544104	0.960773
asp	0.245836	0.462322	0.382089	0.294472	0.364974	0.482826	0.557674	0.626757	-0.531729	1.46977	4.65405	0.054499	0.960773
mia	3.26576	2.53154	2.15336	2.34501	1.99237	2.16794	1.17964	2.22982	0.468443	2.54879	4.65323	0.0545168	0.960773
RpL13A	572.579	433.379	511.292	519.934	501.402	389.596	379.48	441.467	0.277394	8.72671	4.65076	0.0545709	0.960773
Snap24	26.2344	30.2063	26.237	26.6295	29.4959	34.8273	31.9658	32.9239	-0.218785	5.78316	4.6456	0.0546838	0.960773
RpS12	254.437	224.948	291.561	275.823	239.478	215.164	220.573	230.746	0.233705	7.2271	4.64079	0.0547893	0.960773
Mlp84B	12.4313	11.527	13.3968	13.1435	11.159	12.1842	10.5927	9.66594	0.236315	5.20851	4.63932	0.0548216	0.960773
inaE	9.28786	11.9499	6.68158	7.59322	12.1197	11.7096	12.1025	10.1427	-0.35325	6.18243	4.63403	0.054938	0.960773
grh	0.0692394	0.11371	0.103864	0.110208	0.0936351	0.0397357	0.0358727	0.0665364	0.775302	-0.351528	4.63232	0.0549758	0.960773
CG1909	0.609212	0.44708	0.397332	0.764152	0.407607	0.362482	0.311888	0.407255	0.599616	0.230048	4.63084	0.0550084	0.960773
CG1979	0.928415	0.787767	0.46066	1.42234	0.59746	0.557397	0.690904	0.490694	0.649297	1.38178	4.63012	0.0550244	0.960773
Flacc	42.6327	39.7505	26.2782	36.2634	50.4454	45.5141	43.0346	43.4958	-0.308242	7.40571	4.62654	0.0551036	0.960773
Lgr4	0.566489	0.711888	1.17168	0.701779	0.55824	0.698331	0.453082	0.369763	0.617128	0.999334	4.62565	0.0551233	0.960773
Acn	74.9522	81.4504	66.2855	77.0715	83.2602	94.7135	89.6617	86.3306	-0.216986	8.00861	4.62258	0.0551912	0.960773
XRCC1	12.4505	13.061	14.2401	12.727	14.5149	16.2468	15.81	15.2059	-0.211926	5.05175	4.61565	0.0553451	0.960773
CR44816	88.4542	82.2541	141.211	117.656	66.3143	83.0989	95.465	86.2941	0.398938	5.42074	4.60661	0.0555467	0.960773
CG8945	0.291994	0.526156	0.286394	0.43572	0.585505	0.444711	0.625755	0.60328	-0.524687	1.093	4.60332	0.0556203	0.960773
CG12391	19.5764	19.9106	18.6084	19.8473	22.7973	23.9899	20.4814	24.5174	-0.212202	5.65781	4.58979	0.055924	0.960773
GstE6	49.8355	44.1552	61.0721	52.1885	49.0063	40.2243	42.6771	43.6991	0.264573	5.17104	4.58584	0.0560131	0.960773
CG8108	132.285	114.533	111.574	116.222	138.447	139.717	150.224	133.377	-0.218765	8.67683	4.58193	0.0561014	0.960773
ct	0.127775	0.135232	0.150389	0.378796	0.231189	0.297828	0.361091	0.525529	-0.813494	1.80657	4.59432	0.0561168	0.960773
Muc96D	0.591383	0.871601	1.79786	1.38028	0.827327	0.582381	0.728488	0.808729	0.675789	1.43374	4.57452	0.0562693	0.960773
NitFhit	13.5564	10.7726	13.288	13.8797	11.0314	11.1784	10.7496	11.2462	0.244964	4.19728	4.5676	0.0564266	0.960773
id-Dmel_CG42829	2.85535	2.70101	1.9398	2.20111	3.40084	2.67379	4.72739	2.5657	-0.437933	3.89524	4.56614	0.0564599	0.960773
ens	137.876	165.372	98.7913	133.167	155.178	193.939	166.418	165.627	-0.326465	9.75839	4.56484	0.0564895	0.960773
Alp11	0.506663	0.499248	0.37417	0.423389	0.699357	0.644164	0.687275	0.623211	-0.527358	-0.0907535	4.56052	0.0565882	0.960773
CG8372	6.14618	5.40615	6.9647	6.91977	5.21735	5.32901	4.85361	5.48184	0.308159	2.34019	4.55368	0.0567449	0.960773
Mmp2	40.1856	47.261	21.0663	36.1862	53.2178	52.0478	46.1636	46.0132	-0.426066	7.75645	4.54862	0.0568609	0.960773
CR45885	7.86603	6.73341	6.13287	8.24821	5.91997	6.00645	4.0911	6.71258	0.375037	2.77277	4.54228	0.057007	0.960773
CG14671	44.2463	30.0239	37.3558	31.3063	29.0051	28.0022	32.8949	28.267	0.299998	4.66429	4.54097	0.0570373	0.960773
CR45875	15.3093	18.5864	10.5766	14.8388	19.4119	18.9841	18.125	18.608	-0.317695	4.44507	4.53683	0.0571329	0.960773
CG9300	4.69009	5.70549	5.44595	4.57772	4.48424	4.1409	3.50109	4.8188	0.292389	3.3408	4.52905	0.057313	0.960773
Cdc6	1.94657	2.00968	1.47773	1.80907	2.35293	2.08045	2.35239	2.33822	-0.307653	2.36208	4.52042	0.0575139	0.960773
CG7950	8.08293	8.12916	8.80364	7.85523	7.26485	5.95883	7.2874	7.43413	0.258439	3.18968	4.51491	0.0576425	0.960773
Rpp14a	8.24902	8.2962	8.98454	8.01664	7.41413	6.08127	7.43714	7.58688	0.258439	3.18968	4.51491	0.0576425	0.960773
Col4a1	3.07408	4.77178	3.06511	4.35117	7.57648	5.08215	3.57598	5.18946	-0.464416	4.82039	4.50763	0.057813	0.960773
CG12299	3.51605	3.83027	4.04611	4.07123	4.32752	4.68196	5.22154	4.36658	-0.242962	3.82254	4.50595	0.0578524	0.960773
BCAS2	6.82067	5.70442	8.74489	8.60726	5.89007	5.74321	6.54401	5.70475	0.346871	2.77179	4.50418	0.0578939	0.960773
Cisd2	169.119	129.457	180.797	170.585	147.272	114.961	141.603	141.286	0.279849	6.65838	4.49843	0.0580294	0.960773
eIF3d1	25.6977	29.877	36.4003	33.6771	26.5906	27.5446	25.6066	27.246	0.255676	5.87304	4.49785	0.058043	0.960773
CR44987	17.6152	16.4449	13.9398	15.3305	20.8592	19.9875	16.5399	18.8714	-0.243394	5.61006	4.49671	0.0580699	0.960773
Akr1B	622.584	553.285	530.962	579.568	382.161	513.006	549.861	464.781	0.282669	9.64197	4.49514	0.058107	0.960773
hang	17.9838	17.5005	10.4888	14.8221	20.0079	19.8539	20.4272	17.5293	-0.332667	7.24509	4.49357	0.0581441	0.960773
RpL4	257.52	237.027	428.983	375.17	245.747	234.164	269.027	260.475	0.388921	8.66068	4.48847	0.0582646	0.960773
CR43981	11.3607	12.5558	11.6901	11.8261	12.5071	8.94464	8.16418	8.83503	0.328148	2.55787	4.4796	0.0584752	0.960773
br	0.21545	0.335931	0.274583	0.28631	0.42887	0.291011	0.508897	0.302834	-0.437097	2.71996	4.47315	0.0586287	0.960773
Gen	0.335749	0.459493	0.355137	0.50101	0.182662	0.25938	0.34263	0.295755	0.633911	-0.258018	4.4709	0.0586826	0.960773
caz	62.9856	60.4791	58.4078	57.3234	62.09	74.3662	70.8569	74.6496	-0.214116	6.76246	4.46326	0.0588654	0.960773
Mal-A6	565.081	441.89	529.192	468.934	449.754	479.747	342.736	394.385	0.292473	10.04	4.46153	0.058907	0.960773
ATPsyndelta	7.6309	7.19026	9.18984	8.83443	7.94052	5.75177	7.18042	6.79663	0.272914	4.85539	4.4585	0.0589798	0.960773
Rcd4	14.7061	11.9135	15.3176	13.0331	11.1667	10.1498	12.7906	11.7558	0.285753	3.21802	4.45467	0.0590719	0.960773
Eglp4	9.06002	8.78075	11.0442	9.78456	8.1539	8.09251	7.3722	9.24835	0.258422	4.01817	4.45402	0.0590875	0.960773
CycE	1.531	1.71875	1.39586	1.42278	2.08013	1.65768	1.82203	1.85266	-0.263809	3.09751	4.44746	0.0592459	0.960773
CG17571	903.57	821.987	1129.23	861.238	771.094	775.889	800.026	805.737	0.26207	10.0167	4.44155	0.0593889	0.960773
CG32829	3.1982	3.42105	2.54512	3.51074	5.41703	3.31055	4.74412	3.77986	-0.416902	1.72097	4.41782	0.0599677	0.960773
RpL32	381.618	355.614	591.913	501.005	361.616	351.57	381.308	382.383	0.334593	8.36461	4.41065	0.060144	0.960773
CG7506	15.1573	10.0243	14.1586	11.4885	10.5462	8.78001	11.0296	10.6352	0.33582	3.19686	4.4093	0.0601774	0.960773
Rpp21	442.538	645.971	554.763	438.044	481.419	775.879	829.158	690.746	-0.396028	10.4487	4.40723	0.0602282	0.960773
Diap2	13.5299	15.2129	14.0819	14.1267	12.5491	11.9588	13.2644	12.7869	0.195204	4.84537	4.40547	0.0602716	0.960773
CG14630	745.338	1090.76	937.269	738.606	811.23	1311.43	1401.89	1166.58	-0.397564	10.4423	4.40175	0.0603637	0.960773
Atg101	9.09257	10.9147	14.657	11.4393	8.46413	10.6532	9.84425	8.39074	0.326259	4.27612	4.39906	0.0604302	0.960773
bru3	2.9672	2.71852	4.44874	3.4627	2.38557	3.10604	3.02646	2.08369	0.383169	5.28135	4.3973	0.0604738	0.960773
Zasp66	15.9443	19.4891	30.9899	25.1424	13.7103	21.1559	15.6693	18.1581	0.437179	5.81992	4.39725	0.0604751	0.960773
21689685..21696754	0.0899525	0.172348	0.186834	0.205817	0.096478	0.103245	0.0762613	0.138305	0.679367	0.00249448	4.39141	0.0606201	0.960773
CG11562	21.0004	17.0658	14.7651	17.3391	16.771	12.0857	14.6565	14.3797	0.303547	3.58992	4.38797	0.0607056	0.960773
Hacd1	14.0983	11.0374	15.5222	14.6989	12.3162	11.0342	10.4389	12.3943	0.286427	3.72046	4.37666	0.0609881	0.960773
Sod1	149.041	123.705	155.604	149.774	133.313	109.702	123.686	132.579	0.237032	6.63135	4.37091	0.0611325	0.960773
CG30049	5.69775	4.90794	3.81881	5.52111	4.64576	4.53856	3.12821	3.55185	0.355584	3.65374	4.36151	0.0613692	0.960773
CR43430	0.629065	0.962742	0.444894	0.928608	0.946283	1.14664	1.1278	1.28701	-0.574589	0.614724	4.35748	0.0614709	0.960773
Mlc2	202.988	178.208	270.151	232.212	173.463	196.069	190.952	175.227	0.289136	8.85625	4.3559	0.0615109	0.960773
CG12923	18.5807	20.0463	11.0396	16.3502	21.7503	24.1645	19.1326	20.6483	-0.353197	5.12419	4.35398	0.0615594	0.960773
CG15870	3.31005	3.06951	3.75687	5.56011	2.93529	2.49128	2.45355	3.33726	0.508346	1.02114	4.34961	0.0616702	0.960773
CG6337	2.51755	1.77962	2.77415	2.05323	3.84985	2.20273	2.77745	4.27185	-0.496631	1.98236	4.34337	0.0618289	0.960773
18575853..18581982	0.394235	0.875562	0.430967	0.51604	0.648283	0.741944	0.972397	0.887295	-0.528494	2.08797	4.33839	0.061956	0.960773
CG11076	73.1294	67.175	87.3277	72.3629	62.5387	62.276	66.281	69.1112	0.229764	6.68895	4.32492	0.062301	0.960773
ppan	21.1414	19.2103	35.0525	26.386	19.7576	18.2096	20.5438	21.6401	0.369644	5.07455	4.30882	0.0627168	0.960773
CG6271	19.7256	26.2514	15.3682	18.1183	29.8502	27.682	27.3272	19.269	-0.366321	4.62171	4.30557	0.0628011	0.960773
Ubc4	252.86	192.456	150.762	164.719	248.74	253.593	247.219	219.87	-0.324702	8.52899	4.30456	0.0628272	0.960773
Pdk1	38.4974	35.6433	38.7735	38.8494	28.9188	32.81	38.486	30.9044	0.234683	7.8669	4.3003	0.0629379	0.960773
RpS24	101.006	125.748	142.849	143.133	103.017	119.296	103.54	107.848	0.264564	6.2581	4.29872	0.0629792	0.960773
CG5883	15.4829	17.4679	13.8956	15.8994	16.6915	13.5474	8.57314	9.70566	0.396459	3.99992	4.28815	0.0632554	0.960773
Pgant3	24.411	34.2026	26.8193	27.2239	31.4561	32.6696	38.8235	33.4917	-0.254521	6.48807	4.28672	0.0632929	0.960773
CG13585	43.4443	30.1801	41.7227	37.2745	35.4854	29.6629	30.1548	32.9299	0.277504	5.19843	4.27846	0.0635097	0.960773
mars	8.35404	11.2191	6.53828	8.4421	11.3144	11.2532	9.69841	11.1502	-0.307115	5.55211	4.27324	0.0636473	0.960773
axed	24.268	27.2796	18.5907	25.4166	30.6537	29.2059	27.5574	28.1034	-0.250442	6.50746	4.26837	0.0637761	0.960773
Jabba	4.6704	4.98135	5.99643	5.62776	6.38038	6.98095	7.47294	5.4489	-0.281431	3.8502	4.26726	0.0638053	0.960773
SmE	19.5916	20.2136	26.1986	22.4651	20.0366	17.2436	17.7078	19.5892	0.270511	3.41697	4.26375	0.0638984	0.960773
Rbcn-3B	56.4328	64.646	41.6037	53.0455	69.1249	67.6245	66.2943	61.2229	-0.269937	8.65273	4.26272	0.0639256	0.960773
6040416..6042720	0.662175	0.641911	0.382043	0.699911	0.398851	0.511558	0.337873	0.397703	0.559681	0.292809	4.25389	0.0641604	0.960773
CG9917	38.7016	33.4096	23.0217	26.4518	44.6906	37.1005	38.2862	35.3923	-0.329445	5.96241	4.25077	0.0642436	0.960773
fbp	16.4811	10.8855	21.826	21.738	15.3957	13.3133	12.2357	13.0922	0.418615	4.23731	4.24935	0.0642818	0.960773
CG1677	52.7258	57.1917	49.16	53.5357	58.6706	64.9421	64.0974	59.7961	-0.196222	8.12237	4.24459	0.064409	0.960773
CYTB	675.313	513.359	592.689	540.575	470.279	469.815	542.882	503.852	0.249866	9.26034	4.24297	0.0644524	0.960773
MESR6	23.5069	25.4967	21.9005	21.9013	22.4866	29.5013	33.2986	28.4242	-0.270966	5.53229	4.24207	0.0644766	0.960773
RpS8	658.223	533.308	757.501	664.551	574.601	521.383	558.529	571.242	0.257425	9.56441	4.23616	0.0646352	0.960773
Gba1b	0.885175	1.34188	1.28854	1.15153	0.787453	0.949854	1.0006	0.837532	0.405267	1.30161	4.23546	0.064654	0.960773
Dronc	13.1927	13.3037	11.3263	11.4288	14.7179	14.8246	14.8059	13.4966	-0.208039	4.75595	4.22142	0.065033	0.960773
Tbc1d15-17	4.14098	4.30672	3.12343	4.1195	4.9959	5.05648	4.27655	4.80987	-0.262375	3.87073	4.20864	0.0653805	0.960773
Cyp6d5	123.664	134.728	213.396	236.343	128.861	134.896	113.167	157.833	0.429361	7.99588	4.20371	0.065515	0.960773
CG33199	43.3023	27.4879	35.0779	31.6748	30.4354	24.941	27.5543	30.4966	0.304612	5.58217	4.19911	0.0656409	0.960773
Rhau	4.58912	6.04375	5.08406	5.37512	5.97875	6.39656	6.26872	6.39493	-0.22483	4.17541	4.19241	0.0658251	0.960773
Cln3	15.5424	15.3944	19.7367	18.1858	14.9272	15.8676	13.7871	14.8429	0.236618	4.72912	4.18905	0.0659174	0.960773
CG33090	7.49111	8.65016	6.93323	7.28147	8.69682	8.81859	10.8348	8.21098	-0.245273	5.09253	4.1825	0.0660982	0.960773
CG9812	1.27274	1.25337	0.932455	0.884284	1.03628	0.802647	0.60897	0.621232	0.525954	0.603345	4.17892	0.0661974	0.960773
Plod	2.10376	2.11798	1.31143	2.08082	1.53357	1.47313	1.21865	1.69631	0.387618	2.17475	4.17203	0.0663886	0.960773
Alp13	1.71188	1.63997	1.62966	2.12875	2.39487	1.77593	2.90265	2.46758	-0.398527	1.65714	4.17173	0.0663967	0.960773
Mi-2	51.2866	59.8216	39.0993	52.2236	65.6982	62.5685	61.0965	57.1459	-0.261253	8.53107	4.16371	0.0666203	0.960773
id-Dmel_CG33516	0.0979159	0.149957	0.104915	0.15307	0.182642	0.154376	0.197649	0.188187	-0.487125	0.54679	4.16344	0.0666277	0.960773
RpS29	562.705	440.22	517.187	490.425	464.491	413.845	427.77	445.638	0.224418	8.88905	4.15486	0.0668677	0.960773
CG3640	1.59951	2.42252	3.39605	4.04167	2.20783	1.55343	2.07928	1.99818	0.570189	1.29419	4.15277	0.0669265	0.960773
Adk2	113.309	95.5348	116.795	113.107	97.9639	87.0978	101.927	97.3228	0.216242	6.77781	4.15248	0.0669345	0.960773
CG17996	64.9789	49.9618	61.246	62.0705	58.2478	44.5269	50.4514	50.543	0.251698	4.87336	4.15068	0.0669851	0.960773
PPP4R2r	35.2669	36.6928	36.4357	37.368	38.9011	43.0059	43.5817	43.0002	-0.185735	6.66127	4.15006	0.0670025	0.960773
Ugt37D1	49.3409	36.198	44.7666	50.2506	44.5606	38.1036	36.0548	33.184	0.275881	6.34585	4.14372	0.0671811	0.960773
Df31	121.483	113.554	98.2566	106.365	131.013	127.799	131.463	123.782	-0.201415	7.95552	4.14218	0.0672246	0.960773
CR45350	71.9813	60.6141	74.0394	71.702	62.1904	55.2806	64.7215	61.6957	0.215751	6.77909	4.13543	0.0674154	0.960773
9480132..9490604	0.267186	0.254855	0.294293	0.283923	0.390776	0.281472	0.403273	0.347204	-0.345842	1.74934	4.13103	0.0675399	0.960773
mRpL16	13.4463	13.1039	17.4594	13.3765	11.3555	11.5848	12.4158	13.1769	0.265238	3.83959	4.1243	0.0677313	0.960773
Dh31	4.39527	3.94293	4.70339	5.25185	3.70993	3.81557	4.0478	3.68098	0.285794	2.45757	4.11042	0.0681281	0.960773
CG3301	42.0779	28.6977	33.2584	42.1043	37.2943	29.1387	23.2124	27.5319	0.345875	5.4148	4.10354	0.0683259	0.960773
wuho	9.91113	9.04266	9.70597	10.4003	9.10169	8.05975	7.57545	9.10648	0.231523	3.74405	4.10103	0.0683983	0.960773
xmas	1.75291	1.97299	1.6777	1.9068	1.93279	2.39019	2.31867	2.0938	-0.234135	3.96616	4.09585	0.0685477	0.960773
CG10340	24.4758	25.1147	31.5286	22.7975	21.0568	21.1908	21.5871	24.6279	0.255851	4.5004	4.09473	0.06858	0.960773
CR46137	590.638	558.035	427.925	461.041	662.377	583.393	663.449	560.931	-0.253392	7.84727	4.09451	0.0685866	0.960773
Pdi	391.85	434.517	500.544	471.822	358.783	393.771	380.649	420.59	0.234556	9.93147	4.08004	0.0690066	0.960773
CG34228	5.21031	4.89357	5.65854	4.42103	4.00184	3.92371	4.33066	3.23976	0.403525	0.932981	4.07257	0.0692246	0.960773
AstC	71.7973	58.9892	55.435	53.4239	60.596	45.4522	40.1958	52.5211	0.295895	6.0438	4.0708	0.0692766	0.960773
CG2120	10.9573	11.1526	8.99036	11.503	7.29216	10.7438	8.61008	8.59824	0.296015	3.49979	4.06884	0.0693339	0.960773
CG6762	6.33175	6.74399	7.11312	6.49314	7.04992	4.87615	4.78209	5.36085	0.299088	2.80845	4.06218	0.0695294	0.960773
id-Dmel_CR46037-9	0.181751	0.16771	0.21449	0.22601	0.16951	0.14041	0.124515	0.178625	0.389412	1.4636	4.05577	0.0697184	0.960773
CG2218	34.6398	35.1033	24.5339	29.3818	37.7596	40.0529	37.2142	34.7012	-0.252561	6.43306	4.05549	0.0697267	0.960773
CG45081	12.6322	10.9512	18.6532	14.3481	10.4723	11.0248	13.404	9.58098	0.37049	3.06425	4.05111	0.069856	0.960773
CG6179	2.04346	2.45555	3.39316	2.67742	1.88258	1.84818	2.18315	2.25105	0.393721	1.60614	4.04718	0.0699724	0.960773
yellow-h	0.232567	0.289347	0.902664	0.799244	0.295776	0.317335	0.358489	0.142219	0.999802	-0.559898	4.04294	0.0700984	0.960773
mtDNA-helicase	2.0066	1.83077	1.54984	2.01229	1.84127	1.28587	1.14327	1.5084	0.382941	1.72152	4.04254	0.07011	0.960773
DnaJ-H	66.7577	75.4334	57.3632	64.1023	75.1307	76.0144	87.5942	73.6894	-0.222063	7.32839	4.04165	0.0701366	0.960773
20334833..20341683	1.38778	3.39199	1.39249	2.44718	2.64056	3.94219	2.82442	3.37637	-0.549058	4.19855	4.06542	0.0701461	0.960773
brm	25.3783	34.4701	27.9534	33.2892	30.1387	39.5013	39.5708	38.8389	-0.268855	7.55628	4.03264	0.0704052	0.960773
Fdh	64.0721	51.6659	63.1752	63.929	57.6272	47.8972	53.9033	52.2003	0.224207	6.24936	4.02821	0.0705377	0.960773
Adck1	3.50866	3.99075	4.81118	4.1635	3.31636	3.00057	3.67567	3.74968	0.284689	2.94381	4.02242	0.0707112	0.960773
CG18343	38.8645	32.4196	42.2833	39.6169	35.682	28.253	35.469	31.8179	0.248709	4.49008	4.02136	0.0707429	0.960773
7023656..7030988	0.524694	0.197817	0.310229	0.44001	0.266921	0.271827	0.265511	0.183349	0.601717	1.21168	4.02117	0.0707488	0.960773
CR44238	4.84751	3.20154	4.4665	5.61409	3.37389	3.4814	2.9647	4.06729	0.408664	1.83956	4.0209	0.0707569	0.960773
msd1	4.57701	3.62648	2.91869	3.95416	7.18946	3.61569	5.84325	4.91919	-0.48659	1.31046	4.01712	0.0708704	0.960773
Panx	2.84856	4.26344	4.28413	3.53426	4.05967	4.98762	4.82395	4.95184	-0.312764	3.07728	4.01643	0.0708913	0.960773
CG5162	1.82534	1.58969	2.70464	2.64126	1.62501	1.79474	1.40683	1.75408	0.434379	1.58345	4.01261	0.0710066	0.960773
id-Dmel_CG30483	0.221301	0.201909	0.508441	0.326298	0.243252	0.233768	0.208464	0.182281	0.557083	2.11403	4.01058	0.0710677	0.960773
CG10672	26.8903	21.7187	28.9603	25.8738	22.4205	19.9014	22.9774	23.8072	0.240233	4.70748	4.00941	0.0711031	0.960773
mip130	23.782	22.9226	22.7854	23.9147	25.6612	28.018	28.7933	25.6098	-0.186759	6.44541	4.00489	0.0712401	0.960773
id-Dmel_CG14666	2.40923	2.4666	2.05849	2.23207	2.89876	2.64673	2.73724	3.0221	-0.277536	2.16532	4.00204	0.0713265	0.960773
CG34207	11.7279	14.9472	26.0891	18.583	9.24652	14.3576	14.806	13.129	0.489535	3.02578	3.9995	0.0714035	0.960773
sesB	363.064	344.223	397.595	350.883	298.709	310.964	330.701	339.522	0.209784	9.42351	3.99493	0.0715427	0.960773
Atg1	37.218	38.8247	21.849	29.7496	42.9905	46.3762	39.5147	35.4483	-0.341397	7.24058	3.99472	0.071549	0.960773
CG5107	914.817	390.915	413.958	596.712	561.862	400.55	210.336	210.981	0.774967	8.303	4.15094	0.071771	0.960773
Ts	9.70955	8.66476	7.68735	7.84956	11.8097	9.7198	9.03508	10.7153	-0.258184	3.66718	3.97444	0.0721703	0.960773
Ag5r2	891.323	629.718	966.268	676.333	667.918	629.98	710.175	601.779	0.304057	9.26155	3.97428	0.0721753	0.960773
CG6465	8.03615	9.69169	10.3122	12.6349	8.05485	8.01263	7.26547	9.89713	0.314712	3.6767	3.96865	0.0723488	0.960773
6463072..6469273	0.410167	0.43036	0.236647	0.489647	0.181707	0.398352	0.251144	0.216785	0.601292	1.06602	3.96393	0.0724946	0.960773
359	125.322	81.9158	118.71	126.533	116.009	79.27	78.4083	66.506	0.437528	1.77699	3.95786	0.072683	0.960773
Cyp6g1	28.3639	22.6751	21.619	27.1491	23.5937	24.1221	14.6158	18.1367	0.336363	5.54964	3.95612	0.0727372	0.960773
Sec61gamma	25.6617	18.1779	22.2543	18.6311	18.1358	18.4351	14.7141	19.1076	0.292543	3.95894	3.95294	0.0728361	0.960773
CR44291	2.20231	2.00933	2.80875	1.76808	3.17105	2.59257	3.4576	2.74752	-0.422714	1.13416	3.95176	0.0728729	0.960773
id-Dmel_CG14216	1.18727	1.08324	0.833911	1.18111	2.79233	1.45843	1.06978	1.63697	-0.664884	-0.104525	3.94349	0.073131	0.960773
CG10311	0.614882	0.801433	1.4866	1.22338	0.819241	0.517031	0.634379	0.675289	0.657894	-0.0410094	3.942	0.0731778	0.960773
CG17109	187.385	191.102	175.523	162.843	218.179	201.799	212.905	198.252	-0.189283	8.05275	3.94071	0.0732183	0.960773
Cnot4	36.4809	50.244	40.2916	43.6503	44.0639	59.895	53.1737	50.0244	-0.258286	7.72266	3.9402	0.0732342	0.960773
CG1674	4.00287	4.36005	3.95789	3.57091	3.35453	4.03995	3.18322	3.0522	0.244607	4.02241	3.93546	0.0733831	0.960773
CG8745	136.069	85.889	69.3811	91.1491	86.4788	82.4098	55.0981	68.9133	0.411636	7.68244	3.93106	0.0735216	0.960773
Cyp4g1	0.865067	0.789265	1.35241	0.513572	4.08607	0.295654	1.59035	2.78886	-1.2883	1.82535	4.09813	0.0735748	0.960773
CG12288	5.29291	7.39227	7.00016	6.48056	7.93625	8.01623	7.45967	8.21631	-0.250784	3.50291	3.92885	0.073591	0.960773
CG14561	1.26222	1.61669	1.23241	1.83521	1.67525	1.88594	2.5152	2.05267	-0.426053	1.24438	3.92786	0.0736224	0.960773
NijA	2.77471	2.07589	3.07368	2.84313	2.12202	2.05784	2.16942	2.18644	0.358151	1.49742	3.9264	0.0736684	0.960773
alpha-Est7	39.192	31.6441	37.6199	48.979	41.4926	31.3597	23.063	28.7843	0.363366	6.1547	3.92299	0.0737761	0.960773
NHP2	63.515	47.9197	57.8805	53.3026	56.8828	37.3132	47.5578	44.4463	0.284601	5.32191	3.92096	0.0738403	0.960773
CenB1A	27.4076	30.5994	23.5841	25.3191	29.707	31.6727	30.6926	33.5458	-0.209997	6.67954	3.91965	0.0738819	0.960773
Cyp4ac1	18.8766	18.337	17.0907	21.0952	17.8188	18.8907	11.6147	13.5727	0.309348	4.8414	3.91896	0.0739038	0.960773
l(2)efl	14.0324	11.6674	23.6691	17.9725	10.4858	11.2527	13.6227	15.2166	0.436098	3.45864	3.91481	0.0740355	0.960773
CG10433	9.66593	7.43154	9.95481	8.62725	7.28775	7.65676	6.80767	8.53624	0.260831	4.12887	3.9142	0.074055	0.960773
ZnT35C	0.311602	0.230145	0.513655	0.73806	0.774972	0.419222	1.1182	0.855534	-0.797194	0.474271	3.91061	0.0741692	0.960773
Cals	5.2852	7.81897	5.10088	6.10779	7.71594	7.82842	6.78116	7.45852	-0.270728	5.39327	3.90582	0.0743219	0.960773
Rubicon	3.9481	4.73501	2.86552	4.42943	5.45542	5.3957	5.44613	4.0643	-0.325641	3.90074	3.90486	0.0743525	0.960773
Mdh1	67.3954	55.4804	75.4622	80.2488	65.3409	53.7102	57.328	60.7818	0.258074	6.37916	3.89791	0.0745751	0.960773
CG15923	1.04546	1.26956	2.34476	1.48681	0.755317	1.13105	1.35933	1.1037	0.518742	2.51738	3.89757	0.074586	0.960773
Hsc70-4	967.258	955.565	1035.25	966.095	851.871	803.016	960.637	828.646	0.212479	11.2896	3.89491	0.0746713	0.960773
ebd2	16.8343	16.5961	10.8512	13.401	18.2612	18.2721	17.345	17.1171	-0.275607	4.89924	3.89468	0.0746787	0.960773
CG3335	6.39007	8.03131	7.13527	6.94072	8.11855	9.6717	7.49355	8.66786	-0.230097	4.51648	3.89382	0.0747064	0.960773
tilB	5.40897	5.04183	6.29548	6.91832	5.56878	4.65157	4.89671	4.70278	0.280444	2.89585	3.8917	0.0747745	0.960773
Pex12	2.81106	2.20623	2.45893	2.61606	2.0861	1.92147	1.93617	2.41085	0.297236	2.29693	3.89094	0.0747989	0.960773
spri	1.45391	1.91988	1.20739	1.60452	2.30491	1.93698	1.60102	1.92213	-0.303943	4.26427	3.89	0.074829	0.960773
aos	4.45085	6.24033	3.88765	5.11154	5.50674	5.87959	7.70603	5.91213	-0.322348	3.98312	3.88959	0.0748424	0.960773
GstE13	16.963	13.6719	16.323	14.6091	14.1434	11.7485	13.777	13.536	0.235844	3.93469	3.87799	0.075217	0.960773
Non2	321.619	233.546	225.573	238.927	339.971	285.044	323.591	297.466	-0.2634	8.54563	3.87055	0.0754586	0.960773
NijB	3.86213	2.58405	6.93238	3.7994	1.32074	3.10679	3.07218	3.25775	0.692105	1.40053	3.86881	0.0755154	0.960773
IFT54	5.65915	3.9669	3.64333	6.81411	4.21596	3.42747	4.07943	3.86313	0.391925	3.05079	3.86442	0.0756584	0.960773
CR45208	14.3292	20.2961	7.86259	11.3308	20.0929	19.4636	18.1233	17.1722	-0.452504	3.94008	3.85945	0.0758207	0.960773
CR44724	2.44602	1.89073	1.80324	1.96018	1.71095	1.01981	1.28007	1.86083	0.49077	0.759971	3.85566	0.075945	0.960773
vas	1.23853	1.05382	0.931353	0.553755	2.45299	1.30238	1.24534	0.962841	-0.629134	1.50694	3.84947	0.0761483	0.960773
CG17802	6.16952	8.5199	8.66759	7.82487	6.22335	11.9474	11.9042	12.0185	-0.412868	3.97143	3.82975	0.0768003	0.960773
RpL23A	654.499	576.921	839.002	793.01	638.973	549.892	596.807	633.042	0.269093	9.77025	3.82101	0.0770916	0.960773
CG6227	26.1881	23.75	14.2936	20.0991	28.1426	28.6692	25.6344	24.8638	-0.323698	6.66929	3.81821	0.0771851	0.960773
Crag	40.1009	55.9476	32.0591	46.571	53.3741	56.8754	53.8106	53.0915	-0.292668	8.41965	3.81563	0.0772715	0.960773
TfIIA-S	59.2673	48.2904	66.6642	55.1659	52.3435	44.228	50.5378	50.5153	0.24048	5.04538	3.81543	0.0772781	0.960773
CG17121	1.17607	1.45768	1.68994	1.81014	1.53146	1.82202	2.50834	2.72943	-0.464025	1.43246	3.81519	0.0772863	0.960773
CR45873	6.4393	5.36023	4.97909	5.77851	4.45776	3.92695	4.90891	5.29482	0.304082	2.31925	3.80896	0.0774954	0.960773
RhoL	111.744	108.466	125.226	119.969	102.076	100.23	99.8316	112.337	0.191405	7.28054	3.806	0.077595	0.960773
CG45076	44.8044	43.7302	55.5808	48.636	39.3943	48.0803	39.6549	39.8964	0.230749	7.23588	3.80516	0.0776233	0.960773
opa	0.292124	0.355368	0.349567	0.441294	0.232086	0.362995	0.193644	0.166352	0.60698	-0.089941	3.80241	0.077716	0.960773
CR44758	3.63238	2.33616	2.3362	2.54725	1.55502	1.68238	2.07545	2.40335	0.516467	0.377445	3.79951	0.0778137	0.960773
robo1	3.83021	5.10944	3.21481	4.10846	4.89107	5.17592	4.72838	4.97657	-0.259501	4.93624	3.79887	0.0778355	0.960773
CG4367	4.09873	1.89995	10.7559	4.34053	4.43923	0.875513	2.80232	1.39761	1.17567	1.89529	3.9189	0.0783065	0.960773
Cc2d2a	1.21065	1.3773	1.22451	1.53891	1.15002	1.04909	1.25306	1.03412	0.278339	2.40439	3.78228	0.0783987	0.960773
RpLP0	220.528	181.28	229.547	239.965	214.697	174.474	181.617	184.63	0.232	8.07847	3.78205	0.0784065	0.960773
CG3699	145.309	78.6329	93.0641	103.081	98.9729	78.9708	59.6218	87.992	0.395621	6.29266	3.77279	0.0787232	0.960773
RpS19a	228.267	197.762	261.994	266.183	213.744	184.703	202.797	221.647	0.238871	8.1236	3.77237	0.0787375	0.960773
CR45223	0.579258	0.904013	0.269709	0.636911	0.791409	1.11258	0.780195	0.922857	-0.568457	2.25031	3.76898	0.0788538	0.960773
EloA	34.2255	34.5938	22.2659	27.2008	39.8073	36.5295	35.7169	33.5177	-0.275548	6.56327	3.76838	0.0788745	0.960773
kuk	3.37194	4.43585	3.58928	4.03054	4.33938	5.3311	4.40749	4.59671	-0.253032	3.38246	3.76543	0.0789757	0.960773
Tsen2	28.709	21.8278	25.4352	25.8796	25.1723	18.8259	22.0332	21.6286	0.242696	5.02297	3.76173	0.0791031	0.960773
CG18787	0.894754	1.71643	2.56792	1.68893	0.727505	1.27613	1.2967	1.21257	0.621681	1.01805	3.75191	0.0794425	0.960773
CG43673	43.7812	28.5838	94.4165	38.599	10.1997	27.9155	16.2519	45.7138	1.05923	5.0816	4.01011	0.0794993	0.960773
1333119..1345424	3.36431	3.35949	3.72705	4.26712	3.1329	3.24414	3.19351	3.3472	0.212089	5.41281	3.74324	0.0797439	0.960773
14105078..14114170	0.143377	0.114861	0.104915	0.097408	0.136982	0.157463	0.17459	0.174745	-0.456874	0.399846	3.74015	0.0798517	0.960773
Pcd	15.5263	12.6052	16.6	12.5224	14.3578	10.0295	9.04809	12.7706	0.335177	3.23855	3.73853	0.0799082	0.960773
CR45832	1.73051	1.51309	0.41601	1.50634	1.21047	2.29182	2.71689	3.25662	-0.834276	-0.191794	3.7384	0.0799128	0.960773
tsl	1.97677	1.85992	2.53049	3.41067	3.54323	2.65886	3.63693	3.26494	-0.397615	2.5718	3.73348	0.0800846	0.960773
Topors	12.4142	14.3628	9.89516	11.8271	15.1448	13.9826	15.0216	13.6478	-0.22977	5.85517	3.72528	0.0803722	0.960773
CR45033	15.7129	15.6949	26.5524	21.4839	17.5022	12.9525	16.2045	15.8867	0.369139	2.93306	3.72341	0.0804383	0.960773
D1	171.748	136.465	123.35	134.151	177.37	171.799	165.264	160.566	-0.22975	8.18489	3.723	0.0804525	0.960773
brp	0.897972	1.47558	1.03068	1.14685	1.23291	1.68238	1.5392	1.29781	-0.316796	4.1077	3.72195	0.0804895	0.960773
Gs2	86.8001	94.89	153.577	125.881	65.8	98.0416	92.5598	102.189	0.385743	7.83999	3.71976	0.0805668	0.960773
dia	28.466	35.1658	22.4424	28.9163	34.3005	39.6758	31.9512	34.091	-0.262115	7.74111	3.71707	0.0806616	0.960773
CG10194	2.30308	2.14903	4.71108	3.17634	2.00151	2.07961	2.41602	2.41437	0.489875	1.71397	3.71223	0.0808327	0.960773
alphaTub84D	17.8584	17.0262	19.5135	20.7693	17.2996	16.7882	15.9905	16.5902	0.197585	5.13689	3.71104	0.080875	0.960773
CG7025	39.1942	33.5463	36.7464	39.7876	33.7865	31.9013	36.7654	26.4826	0.236439	5.55591	3.70861	0.0809613	0.960773
CG6878	35.3313	26.3893	41.5982	36.3395	23.9039	26.33	30.2358	33.4917	0.317307	4.08052	3.70783	0.0809888	0.960773
CG31674	47.174	38.061	47.9355	50.0529	38.837	45.7426	34.5313	37.7889	0.248546	5.76481	3.70635	0.0810415	0.960773
CG31259	8.60771	10.3849	10.8111	8.03669	6.33089	9.61653	7.39118	7.98644	0.294171	4.41838	3.7055	0.0810715	0.960773
Cdc7	15.9247	18.0728	19.7354	19.7058	13.6288	14.0872	17.7425	17.4104	0.247038	5.72723	3.7043	0.0811144	0.960773
MEP-1	26.6607	31.2896	21.262	25.7203	30.1077	35.0751	30.6084	29.9477	-0.238717	7.36456	3.7012	0.0812246	0.960773
CG11555	7.10422	5.73382	6.77877	5.91212	5.98864	5.24706	4.8904	5.38273	0.272011	2.46871	3.69959	0.081282	0.960773
solo	0.657499	0.660744	0.373848	0.341264	1.29753	0.698294	0.637313	0.567733	-0.622379	1.16799	3.69815	0.0813334	0.960773
Pdfr	1.55313	1.41703	1.98867	1.5654	1.22616	1.61183	1.32828	1.19138	0.306617	2.80677	3.6959	0.0814137	0.960773
CG42245	29.4527	34.4101	23.5042	28.4396	33.0394	38.7422	33.8452	33.026	-0.237509	7.34405	3.68627	0.0817585	0.960773
CG32984	0.389366	0.473663	0.8237	0.710134	0.453926	1.21753	1.61995	0.810691	-0.758977	0.727751	3.68561	0.0817824	0.960773
Gem4c	0.28855	0.386123	0.177578	0.325327	0.466467	0.390635	0.362417	0.526842	-0.535732	0.350131	3.68462	0.0818177	0.960773
l(2)k05911	1.54707	1.30293	1.26335	1.77582	1.65375	0.935126	0.863188	0.960619	0.44388	1.80741	3.68388	0.0818445	0.960773
dbe	59.5713	41.2776	49.4492	45.9683	49.4025	36.6749	40.9494	38.7053	0.270948	5.74766	3.68358	0.0818552	0.960773
CG3679	2.86827	1.97624	2.25973	2.4795	2.36145	2.08705	1.4907	1.77733	0.338688	2.81096	3.66883	0.082388	0.960773
CR43889	37.7528	44.9776	13.555	23.6947	47.9793	50.9638	42.0115	40.5219	-0.573987	4.8866	3.7147	0.0824154	0.960773
CG10333	22.3162	29.0337	23.0707	23.3914	25.7931	33.2754	28.2508	29.2913	-0.231926	6.15374	3.66564	0.0825036	0.960773
Rrp4	8.27816	6.58317	8.0032	7.45621	6.44253	5.87669	7.2184	6.34249	0.253088	3.00941	3.66285	0.0826049	0.960773
beta4GalT7	4.4558	3.24701	4.5406	4.60539	4.04775	2.63121	3.35242	3.39211	0.35363	2.07626	3.65859	0.0827603	0.960773
CG6329	0.648281	0.458393	0.748055	0.741656	0.453463	0.558062	0.39694	0.545101	0.43179	1.19512	3.65694	0.0828202	0.960773
CG34325	10.2862	10.9606	12.2795	10.4349	9.56967	10.5393	8.37365	9.64053	0.228887	3.69066	3.65323	0.0829558	0.960773
CR42491	50.4855	45.7121	92.4916	68.3905	43.3136	44.7618	55.4565	54.2823	0.402515	5.41321	3.65305	0.0829625	0.960773
CRG	7.61298	8.25028	11.4379	10.5958	5.50018	7.76291	9.22517	7.73938	0.348334	4.5122	3.64911	0.0831068	0.960773
CR43972	2.03462	1.57346	1.0509	1.46504	2.13252	1.6424	2.37293	2.2345	-0.424476	1.60395	3.6404	0.0834266	0.960773
CG31460	2.57224	2.38731	3.27517	1.85299	3.72257	2.97585	3.88521	3.1537	-0.422613	1.13401	3.6397	0.0834523	0.960773
gcl	2.85157	3.76958	2.28137	2.78635	3.42781	3.6702	3.71288	3.73892	-0.29244	3.05094	3.63903	0.0834771	0.960773
CG31265	51.3878	37.8527	56.1885	56.5153	44.5011	40.151	43.8267	42.8939	0.262564	5.41035	3.63767	0.0835273	0.960773
E(spl)mbeta-HLH	21.8491	15.0102	17.7082	17.8543	13.7973	16.8793	15.4975	15.1847	0.263689	4.03896	3.63547	0.0836085	0.960773
Jon99Ciii	3195.92	2307.05	3534.1	2732.68	2371.8	2800.19	2157.47	2430.13	0.295957	11.7069	3.63542	0.0836103	0.960773
Ance-2	1.889	1.03147	1.20546	1.65142	1.06774	0.593841	1.26717	1.15516	0.527875	1.4849	3.63277	0.083708	0.960773
pirk	868.025	883.165	683.991	606.361	944.478	1055.06	965.935	798.136	-0.283887	10.6154	3.62851	0.0838658	0.960773
CG1774	10.7875	8.15764	7.1806	9.67705	8.6259	7.5168	7.10193	6.78493	0.279679	3.9428	3.62758	0.0839003	0.960773
Nmd3	26.9512	28.6555	41.4451	32.4634	27.1396	26.4602	25.7559	29.8232	0.270672	5.74276	3.62427	0.0840231	0.960773
CG9471	18.7263	16.7213	18.9601	18.3314	15.976	14.0374	16.1362	17.6117	0.214526	4.03406	3.62294	0.0840724	0.960773
CG10958	3.66219	3.33047	2.6531	2.91219	3.57028	3.90306	3.80702	3.92922	-0.252062	3.22864	3.61967	0.084194	0.960773
AhcyL2	12.3866	12.4652	14.7588	14.5233	12.2301	13.6595	10.588	10.1804	0.238504	4.63706	3.61164	0.0844937	0.960773
CG4627	1.25519	1.6444	1.70834	1.53684	2.82157	2.24485	1.69778	1.73197	-0.442822	0.902993	3.60398	0.0847811	0.960773
wgn	20.9863	17.8053	29.3084	23.1213	17.7322	21.5377	18.6836	17.6815	0.295045	5.76135	3.60381	0.0847875	0.960773
RhoGAP18B	33.1419	36.3676	24.9701	30.2754	38.5638	37.8135	36.9154	35.068	-0.226883	7.99476	3.60005	0.0849288	0.960773
CG7789	7.93548	6.98339	8.70219	8.06228	7.89965	4.72054	6.89201	6.48995	0.310995	3.03703	3.59981	0.0849378	0.960773
CG11885	3.66022	3.70475	4.61951	3.47055	2.98699	3.02965	2.90918	3.24254	0.366495	0.983534	3.59732	0.0850315	0.960773
Jon99Cii	1939.73	1590.91	2648.34	2005.96	1461.74	1897.91	1623.41	1725.43	0.311817	10.6509	3.59642	0.0850656	0.960773
nop5	40.8659	42.0216	43.8362	44.0213	40.4526	38.0938	37.7685	38.175	0.168587	6.20541	3.5963	0.0850701	0.960773
RhoGAP5A	7.53418	6.16859	7.93445	7.33145	6.78126	5.34481	6.5703	6.19673	0.24407	3.70943	3.59484	0.085125	0.960773
ppk18	3.21426	2.182	3.70895	3.82568	2.15911	2.24666	3.00979	2.61075	0.390472	2.27225	3.59038	0.0852938	0.960773
CG15894	0.106921	0.187299	0.128311	0.127639	0.219382	0.169921	0.19338	0.193164	-0.467863	0.374463	3.58914	0.0853406	0.960773
CG17549	33.9921	31.954	58.7439	38.7593	32.0724	36.873	32.0204	29.236	0.352923	5.46861	3.5882	0.0853763	0.960773
Cyp6a21	84.3403	54.395	47.2655	66.7964	58.0038	58.5594	29.1457	42.6035	0.451636	6.49382	3.60468	0.0854517	0.960773
Gbs-70E	6.83784	4.47513	5.26014	6.41334	3.83471	4.29112	4.56779	5.85154	0.334181	3.89338	3.58223	0.0856027	0.960773
CR45146	11.3154	10.0789	5.70963	8.08956	13.8087	12.4626	10.6952	9.84158	-0.384815	3.09671	3.57173	0.0860033	0.960773
stx	23.9593	22.5696	18.775	25.729	22.7665	19.2376	17.1164	19.4971	0.236423	7.29473	3.57123	0.0860221	0.960773
tey	7.46993	8.43889	8.44848	9.35813	6.82852	9.09096	6.08503	6.50145	0.265009	4.74222	3.57054	0.0860486	0.960773
CG7728	17.1321	17.9518	17.5723	16.9227	18.5928	20.5347	19.9855	20.6872	-0.174477	6.10137	3.56839	0.086131	0.960773
CG15141	3.60871	4.55088	4.36032	3.74035	5.25112	5.42145	4.39606	4.62982	-0.253457	2.93003	3.56491	0.0862643	0.960773
Taldo	93.3146	62.3911	88.6725	85.4041	78.2868	60.1746	72.1735	67.9041	0.270501	6.40978	3.56432	0.0862869	0.960773
Rev7	11.2499	11.0322	12.7164	10.3541	13.8825	11.1826	15.2833	14.7085	-0.255522	3.39022	3.56108	0.0864113	0.960773
Eglp2	57.6936	42.827	55.4083	54.6114	49.236	46.814	47.046	37.0924	0.250684	5.92207	3.56033	0.0864404	0.960773
His4r	103.025	79.2359	103.992	85.68	88.4852	77.7347	74.8091	81.9199	0.229703	6.11411	3.5562	0.0865995	0.960773
CG31269	5.22617	3.25106	4.77741	5.90802	3.73476	3.77527	3.32464	4.17425	0.376888	2.02296	3.55479	0.0866537	0.960773
CG7550	1.58991	1.67134	2.63226	1.65043	1.61177	1.03755	1.1721	1.59427	0.499272	0.626243	3.55362	0.0866991	0.960773
metro	0.937258	0.823845	0.88367	1.11433	0.682249	0.736686	0.915193	0.593123	0.3841	1.25445	3.54142	0.0871716	0.960773
Arl2	16.5777	14.0195	20.5834	14.5629	15.0091	10.6992	14.7942	13.5084	0.308718	3.30487	3.53946	0.0872479	0.960773
MtnE	44.2227	35.8325	37.6641	26.3959	73.1102	40.3924	72.7023	28.1285	-0.544765	4.75821	3.56969	0.0872858	0.960773
KCNQ	13.1132	9.14903	9.66777	13.3798	10.5615	10.1287	7.59085	9.16311	0.301102	5.3287	3.53504	0.0874203	0.960773
cni	15.8722	11.6833	14.1553	14.0235	14.3515	12.1135	10.0859	10.289	0.277161	3.92838	3.53295	0.0875017	0.960773
Sil1	8.82222	10.3467	9.71909	9.48479	9.55617	10.9938	11.8768	13.5345	-0.238047	4.27481	3.52746	0.0877163	0.960773
Galphai	160.299	153.691	112.189	130.696	186.361	157.827	172.027	153.523	-0.241863	8.30662	3.52616	0.0877675	0.960773
6463858..6469062	0.482624	0.512794	0.260828	0.55305	0.205117	0.463868	0.29925	0.258309	0.582111	1.03009	3.52534	0.0877997	0.960773
CG4558	5.72819	5.48688	4.0769	4.36733	6.99697	6.03973	5.42425	5.69238	-0.271564	3.5405	3.52328	0.0878803	0.960773
CG10898	3.06839	4.44976	4.24875	3.85575	2.62074	3.62163	3.04253	3.53832	0.305854	2.82057	3.51469	0.0882184	0.960773
CG6912	1.15792	1.34088	2.46669	2.61395	4.27818	1.5335	2.66395	3.65912	-0.653964	1.83634	3.51408	0.0882426	0.960773
CG14500	202.86	199.483	187.688	134.103	228.754	202.868	259.452	200.086	-0.275125	7.09414	3.51337	0.0882706	0.960773
mtSSB	23.8901	21.3931	25.1421	20.4653	20.6306	18.7491	21.1499	18.7592	0.221547	3.6203	3.5127	0.0882971	0.960773
CG11760	2.61652	2.12875	2.48075	1.67451	1.89628	1.78042	1.617	1.88978	0.333196	1.96208	3.51101	0.0883638	0.960773
CG31036	0.86148	0.785993	0.695846	1.1522	0.973076	0.819764	2.03779	1.34296	-0.540062	1.87278	3.50782	0.0884901	0.960773
mRpS10	14.9854	12.746	17.854	13.6956	13.6731	11.7247	13.0832	12.0588	0.254923	3.43471	3.50208	0.0887178	0.960773
CG1304	128.297	117.574	186.008	129.686	107.8	119.656	119.815	124.007	0.277438	6.85198	3.50088	0.0887656	0.960773
ZnT77C	2.7836	2.49392	2.79242	2.63195	2.39731	2.18089	2.52764	2.12066	0.238358	2.6734	3.49892	0.0888434	0.960773
dgt1	7.3255	7.61061	9.8714	8.58527	6.84381	6.84427	7.04238	8.07616	0.236659	4.3062	3.49885	0.0888462	0.960773
MAPk-Ak2	190.442	224.043	189.704	200.536	214.234	233.539	245.953	239.492	-0.191284	8.89861	3.49841	0.0888636	0.960773
Dap160	24.1259	25.3644	16.8973	22.121	27.4305	28.0616	26.4783	24.326	-0.24093	7.28185	3.49497	0.089001	0.960773
rictor	6.21903	6.28971	6.44112	7.47294	5.90138	5.90741	6.19165	5.52734	0.191437	5.39774	3.48762	0.0892945	0.960773
CR45778	13.3853	9.44226	12.0549	12.1466	11.2658	8.24373	9.47202	10.4784	0.27931	3.40555	3.48658	0.0893361	0.960773
dUTPase	15.8219	11.1611	14.2494	14.3578	13.3166	9.74441	11.1963	12.3859	0.27931	3.40555	3.48658	0.0893361	0.960773
CR31054	15.8687	17.4182	7.29632	12.9436	22.7953	18.5197	15.9791	16.6514	-0.439457	3.06826	3.48136	0.0895459	0.960773
wal	54.3932	50.8029	54.9336	58.8991	51.4622	47.7218	49.2842	48.9993	0.174152	6.36299	3.47964	0.0896149	0.960773
CG33156	0.803806	0.907985	1.15939	0.856753	0.838914	0.701236	0.504788	0.8276	0.398569	1.48434	3.47866	0.0896542	0.960773
syd	48.4226	54.6583	26.911	40.8211	58.3354	54.9139	54.6981	51.3455	-0.33789	8.09407	3.47844	0.0896631	0.960773
RpS4	105.95	109.52	167.052	142.339	105.957	104.685	114.461	114.91	0.278915	7.45145	3.47653	0.0897403	0.960773
CG44286	8.09432	7.60813	9.10249	8.89725	6.61301	8.43039	7.24902	7.07345	0.222025	4.28971	3.47632	0.0897486	0.960773
Ankle2	3.32011	3.27095	2.78788	3.44244	3.96147	3.87405	3.88371	3.38522	-0.211918	3.83759	3.47406	0.0898398	0.960773
CG42795	0.201747	0.754682	0.448965	0.530422	0.513405	0.961866	0.654296	0.916733	-0.635066	2.79283	3.49048	0.0899273	0.960773
Clp	3.93011	4.91292	3.94602	5.02679	4.04623	3.83043	3.60599	3.5805	0.265948	2.37368	3.46957	0.0900213	0.960773
Pex11	15.6663	14.2328	17.732	14.3276	13.7115	11.4531	15.8855	11.3789	0.265673	3.77991	3.46339	0.0902715	0.960773
CR43812	21.6359	17.3473	29.505	23.9152	19.0576	15.0504	21.2044	18.6911	0.344467	2.61176	3.43978	0.0912365	0.960773
CR40469	26.1518	7.04961	41.15	18.3295	9.1464	9.70811	21.2755	10.2808	0.900538	1.95585	3.49846	0.0912967	0.960773
rogdi	20.3567	22.89	28.1167	21.8866	18.3	19.8022	21.6312	21.052	0.23027	5.69644	3.43706	0.0913483	0.960773
p24-1	52.3092	48.9116	49.4784	46.9264	58.6972	59.4289	56.2531	52.4285	-0.174201	6.35367	3.43703	0.0913498	0.960773
Ggamma30A	0.076054	0.0878937	0.0877591	0.131143	0.0662028	0.0761017	0.0620902	0.073085	0.485765	0.130899	3.43548	0.0914134	0.960773
CR9162	1.02658	0.796129	0.8292	0.868063	1.05318	1.40487	1.25714	1.08515	-0.423204	0.436261	3.42902	0.0916803	0.960773
CG32549	15.1787	19.3831	17.9595	20.2215	15.192	16.5289	15.8716	16.5174	0.204839	5.89128	3.42899	0.0916818	0.960773
Trxr-1	91.7267	90.3267	90.1037	105.947	89.9684	74.8304	89.7565	81.2713	0.195673	8.13449	3.42864	0.0916961	0.960773
dod	25.3825	21.9081	31.589	29.9602	24.8929	19.5231	24.0569	24.1222	0.258509	4.68861	3.4259	0.0918097	0.960773
RpL34b	1006.84	784.979	1022.63	1054.17	952.719	771.799	807.555	811.355	0.236854	9.70822	3.42373	0.0918998	0.960773
glu	6.91387	7.3027	5.67303	6.80104	7.24193	8.78696	8.17582	7.28606	-0.215603	5.04114	3.42298	0.0919306	0.960773
Jheh2	15.2387	14.039	14.2501	15.1596	13.9352	13.9062	12.4418	12.4226	0.179647	4.74906	3.41917	0.0920891	0.960773
CG11384	1.69374	2.31127	2.0224	1.89008	1.38736	1.50842	1.60937	1.95315	0.316087	1.97835	3.41889	0.0921009	0.960773
CG8027	0.391815	0.469195	0.62166	0.584673	0.73085	0.670249	0.645903	0.753037	-0.415377	0.714389	3.41691	0.0921834	0.960773
ntc	8.73844	10.5565	6.13869	7.34487	11.1684	10.1441	9.92741	9.52471	-0.290449	3.85771	3.41641	0.092204	0.960773
Spindly	1.1754	1.59719	1.32744	1.49272	1.27116	1.86576	2.13198	2.0187	-0.35979	2.05583	3.40869	0.0925268	0.960773
Fas3	25.1038	31.0609	18.6846	24.3995	29.7417	31.2338	30.3796	28.7499	-0.253126	7.50083	3.40747	0.0925778	0.960773
CG8677	7.80844	16.441	9.38579	12.5458	13.0536	17.3469	15.458	14.7244	-0.372498	6.93534	3.40385	0.0927295	0.960773
CR44910	144.004	145.276	125.723	144.282	157.601	171.529	152.757	162.386	-0.180563	5.91554	3.40339	0.0927487	0.960773
ELOVL	14.8198	14.4471	17.8999	17.2749	11.6433	14.1512	14.8858	15.0307	0.233139	4.89434	3.39688	0.0930228	0.960773
CG31710	27.5868	27.9251	27.6111	26.8089	23.3483	26.1593	22.3	26.4485	0.185399	5.28503	3.39641	0.0930426	0.960773
CG13482	2174.05	3099.81	3400.47	3041.13	2087.16	2566.97	2605.59	2553.25	0.277669	10.5062	3.39465	0.0931165	0.960773
Rip11	206.194	240.592	158.203	196.64	237.992	251.28	235.078	235.191	-0.237061	9.74018	3.3946	0.0931185	0.960773
15826915..15829287	0.7236	0.684646	0.432945	0.879812	0.524894	0.544223	0.530155	0.360553	0.498528	0.537667	3.39402	0.0931431	0.960773
pHCl-1	0.137028	0.107657	0.210824	0.0605856	0.0851994	0.0604915	0.114738	0.0365775	0.810425	-0.151476	3.39396	0.0931455	0.960773
mRpL23	7.09659	4.3165	7.40141	5.97366	5.89736	4.9402	4.41378	4.10922	0.381301	1.96936	3.38941	0.093338	0.960773
Ino80	4.32426	6.46307	4.115	5.27925	5.37358	7.29848	5.90733	6.41676	-0.287661	4.88961	3.38771	0.0934098	0.960773
pre-mod(mdg4)-W	6.16785	5.79309	7.69553	7.00311	5.15618	6.18325	6.00854	5.81536	0.226367	4.77332	3.3829	0.0936138	0.960773
CG46429	26.644	28.6372	37.4859	29.7334	23.7865	27.2771	29.0736	25.5742	0.236257	6.4675	3.38159	0.0936697	0.960773
smog	0.192213	0.213288	0.185828	0.0981917	0.140506	0.0871461	0.146808	0.0848662	0.60935	-0.0933492	3.38153	0.0936721	0.960773
Sesn	17.3354	18.6444	24.3972	19.372	15.5011	17.7591	18.9287	16.6393	0.236067	6.46842	3.38062	0.0937108	0.960773
Srrm234	37.0051	36.8241	30.0526	35.3505	38.1526	41.9526	41.7742	39.4141	-0.18896	7.93361	3.37882	0.0937875	0.960773
CG5033	31.5958	34.7242	27.5847	29.4564	31.8271	40.6828	35.5418	36.9016	-0.2104	6.39813	3.37795	0.0938245	0.960773
CG17684	1.0668	0.461048	0.647889	0.698203	0.567296	0.570089	0.484831	0.467615	0.484787	1.11698	3.37748	0.0938445	0.960773
CR46469	3.0014	2.64873	2.10242	2.9031	3.22936	3.38419	2.79169	3.5962	-0.262465	3.64347	3.37621	0.0938985	0.960773
Bub1	13.2647	15.7501	9.91261	11.5474	14.5684	17.2162	15.5544	14.1323	-0.262145	5.90394	3.37534	0.0939359	0.960773
Iru	13.325	12.3047	15.4223	13.8584	12.7664	10.6417	12.7422	12.1451	0.209984	4.34972	3.37455	0.0939693	0.960773
CR43463	2.01593	1.89676	2.21715	2.31883	1.93891	1.5852	1.92867	1.60427	0.283976	1.99009	3.3678	0.0942581	0.960773
pkaap	6.72729	6.70877	5.35563	6.29033	6.84568	8.14963	6.97569	7.6674	-0.217389	4.06529	3.36767	0.0942638	0.960773
SCOT	8.33099	7.30532	8.60044	7.26691	7.5558	6.12758	7.59337	6.12434	0.226537	4.12168	3.3665	0.0943139	0.960773
pre-mod(mdg4)-V	6.3061	5.92993	7.85156	7.12414	5.27797	6.31617	6.15046	5.93128	0.224369	4.77014	3.36374	0.0944322	0.960773
inc	28.8532	36.3917	23.1616	29.419	33.7322	40.878	31.8842	36.4126	-0.256774	7.25378	3.363	0.0944638	0.960773
CG42724	29.3601	33.2015	33.5569	34.5417	31.6799	39.7179	43.6071	39.4668	-0.219151	7.77747	3.35907	0.0946328	0.960773
CG3746	5.97365	5.03096	6.1507	5.16554	4.37134	3.69192	5.58386	4.45988	0.325796	1.83034	3.35787	0.0946844	0.960773
CG14646	11.0374	11.0464	14.7288	13.389	10.1364	10.1427	11.8648	11.1657	0.23673	4.31294	3.35712	0.094717	0.960773
16684075..16689237	50.1947	49.7242	61.7433	50.4551	65.7349	46.4052	90.6096	68.5176	-0.330275	8.28439	3.35693	0.0947252	0.960773
Uhg7	89.7298	74.6315	172.915	125.782	81.8548	78.6894	103.166	86.2995	0.429109	5.42386	3.36425	0.0947407	0.960773
nur	0.712166	0.389857	0.821771	1.06271	0.6642	1.13179	1.81131	1.36873	-0.715892	-0.0718378	3.35074	0.0949922	0.960773
so	0.433716	0.499845	0.566317	0.70397	0.425793	0.463546	0.279539	0.43872	0.475992	0.470922	3.34911	0.0950627	0.960773
14889264..14897813	0.401661	0.532732	0.557891	0.503172	0.482135	0.288957	0.357343	0.453885	0.359061	1.95609	3.34877	0.0950774	0.960773
pre-mod(mdg4)-U	6.24476	5.87225	7.77519	7.05484	5.22663	6.26124	6.09064	5.87359	0.223966	4.77033	3.34842	0.0950927	0.960773
Dl	2.6629	3.23209	2.23851	2.93677	3.29267	3.28727	3.12136	3.48526	-0.229028	4.00483	3.34652	0.0951748	0.960773
mir-2489	13.054	10.994	5.40726	8.9905	15.6087	15.6628	11.3509	14.4743	-0.537658	0.265357	3.34611	0.0951926	0.960773
pre-mod(mdg4)-AD	9.97337	9.60759	12.3154	11.1973	8.39563	10.2236	9.8707	9.11104	0.220115	4.63497	3.34567	0.0952119	0.960773
pre-mod(mdg4)-AE	9.97337	9.60759	12.3154	11.1973	8.39563	10.2236	9.8707	9.11104	0.220115	4.63497	3.34567	0.0952119	0.960773
Mal-B1	0.52588	0.543773	0.323635	0.279014	0.196184	0.71193	1.9815	0.64011	-1.04731	0.319446	3.35144	0.0952931	0.960773
CG8950	46.8553	69.7607	27.4965	44.0021	60.8196	68.2421	61.4291	60.8879	-0.398087	7.47672	3.3456	0.0952956	0.960773
8015706..8017666	0.940487	0.917254	1.45945	1.01626	0.57468	0.773095	1.13033	0.607708	0.508647	0.906057	3.34195	0.0953734	0.960773
16222833..16231124	0.207079	0.178438	0.172575	0.175486	0.243203	0.250547	0.238416	0.221106	-0.35264	0.857563	3.34013	0.0954524	0.960773
fzy	1.40192	1.56978	1.21327	1.34711	1.5898	1.77226	1.90587	1.63807	-0.295539	1.66311	3.33933	0.0954873	0.960773
CG6724	14.5422	10.8109	15.3461	13.7661	11.3603	11.5591	12.1376	12.0635	0.233798	4.2908	3.33418	0.0957117	0.960773
CG3348	216.466	91.845	112.169	132.792	121.745	85.9259	108.389	100.985	0.43661	6.09287	3.34718	0.0957188	0.960773
Secp43	16.3148	10.7846	17.5067	14.5244	11.7269	11.8355	12.4318	13.431	0.283672	4.061	3.33394	0.0957224	0.960773
CR44062	2.57092	1.82713	3.21641	3.01525	2.65016	3.17783	4.58866	4.16093	-0.433637	1.91186	3.3318	0.0958159	0.960773
Act87E	96.4657	120.409	215.264	153.793	74.76	114.473	132.345	112.963	0.453922	7.99062	3.34634	0.0958952	0.960773
pre-mod(mdg4)-Y	9.19064	8.83064	11.3195	10.3036	7.72779	9.40732	9.08368	8.39712	0.219098	4.63674	3.32415	0.0961512	0.960773
CR45044	8.97504	7.66093	9.09578	8.6195	8.75012	6.20312	7.65742	7.31758	0.224759	4.58049	3.32064	0.0963051	0.960773
CG32373	3.58572	3.75571	4.8327	4.86555	4.12007	3.07721	2.94538	3.94193	0.299404	3.11856	3.3171	0.0964611	0.960773
Pgant35A	1.88434	1.77295	2.07242	2.16746	1.81234	1.48173	1.80277	1.51369	0.280882	1.99148	3.31675	0.0964767	0.960773
CG3740	18.4499	13.9285	16.9961	13.3936	14.2022	12.2256	13.4412	13.8593	0.249652	3.6018	3.31608	0.096506	0.960773
CG1494	0.127914	0.185667	0.161018	0.347046	0.0867625	0.0616013	0.202649	0.134095	0.785032	-0.071837	3.3051	0.0969919	0.960773
garz	14.6005	19.6291	9.49224	14.1881	19.0716	20.9976	16.6137	17.3964	-0.333698	6.84033	3.30483	0.0970038	0.960773
eIF3k	87.9763	75.5737	124.056	98.5711	89.7692	71.3554	77.5356	85.1866	0.280003	6.24502	3.30302	0.0970845	0.960773
bin	1.99068	1.87639	2.16015	1.32461	1.70906	1.72267	0.769955	1.16552	0.47712	1.9613	3.29736	0.097336	0.960773
CR45949	0.660369	0.471525	0.59635	0.72835	0.50878	0.532344	0.419217	0.344885	0.46595	0.309383	3.29646	0.0973763	0.960773
pre-mod(mdg4)-X	7.77683	7.39351	9.6955	8.94387	6.50423	7.88007	7.68631	7.35661	0.223748	4.75544	3.29596	0.0973988	0.960773
CG12948	12.1624	9.32047	8.8892	9.78777	11.8314	11.533	12.3049	12.0698	-0.224323	4.06601	3.29209	0.0975715	0.960773
Cyp4ad1	14.7879	11.0681	12.7449	17.3875	13.3088	12.8203	10.4988	10.2766	0.281197	4.61809	3.28023	0.0981034	0.960773
CG7378	12.8122	12.4996	12.8403	11.6231	11.4927	13.085	8.9189	9.35364	0.240474	5.47424	3.28022	0.0981039	0.960773
CG6296	146.687	169.079	131.588	176.533	111.515	176.711	120.646	88.3663	0.349548	8.221	3.27842	0.0981849	0.960773
CG16979	9.38715	10.3087	11.8182	11.5494	9.24773	9.30338	9.36969	10.1856	0.199874	4.38055	3.27653	0.0982701	0.960773
Prm	28.4082	37.2344	57.9771	46.5639	28.538	39.0877	34.8696	32.1942	0.360605	7.67575	3.2719	0.0984796	0.960773
RpL40	425.633	428.662	580.893	488.899	440.032	385.89	402.944	446.621	0.22455	8.2134	3.27067	0.098535	0.960773
Prat	8.0062	5.89885	6.17055	5.80068	5.67771	5.78834	5.17965	5.6033	0.242975	3.67078	3.27046	0.0985445	0.960773
CG8788	10.1988	9.62493	11.5566	11.3747	8.37543	10.6846	9.29273	9.03071	0.216974	4.26007	3.26998	0.0985662	0.960773
CG15484	7.17462	6.29173	6.30959	7.06811	8.67282	7.22626	7.90673	8.19981	-0.228416	2.76027	3.26781	0.0986645	0.960773
Psf1	3.44634	2.43163	2.86326	2.01136	2.22852	2.35309	1.77472	1.67798	0.442953	0.752146	3.26626	0.0987349	0.960773
11312119..11319407	0.0959748	0.143288	0.191288	0.216993	0.170884	0.0847367	0.0821889	0.0838437	0.640147	0.0419111	3.26524	0.0987815	0.960773
CG4854	1.04256	0.903648	1.38347	1.37423	1.45852	1.5188	1.42403	2.05382	-0.434421	0.817623	3.26322	0.0988731	0.960773
RpS27	243.786	209.252	271.844	249.551	230.702	200.067	211.607	222.365	0.197772	7.39051	3.26286	0.0988896	0.960773
CG5787	12.3975	11.7898	9.72537	11.1243	13.8783	14.489	12.502	11.9304	-0.205158	5.47609	3.26197	0.0989299	0.960773
2294097..2299243	0.568377	0.631305	0.605951	0.583866	0.881571	0.616369	0.849669	0.658987	-0.305976	1.82003	3.26013	0.0990136	0.960773
CG6675	1.20498	0.529339	0.617972	0.799156	0.957333	0.985081	1.42937	1.32949	-0.548943	0.548857	3.25659	0.0991748	0.960773
beta4GalNAcTB	19.1166	16.3017	19.638	18.3609	18.8184	13.361	16.3868	15.403	0.224689	4.53829	3.25476	0.0992584	0.960773
CG32713	3.67517	2.84287	0.783625	3.33818	1.78833	1.0581	1.50521	2.14973	0.741138	0.824533	3.25435	0.0992775	0.960773
abs	22.4102	24.1984	16.6448	21.5328	28.1254	28.694	22.6717	22.8525	-0.247703	5.54456	3.25425	0.0992819	0.960773
LysC	187.898	196.01	249.112	282.477	188.601	254.993	121.672	128.92	0.423563	5.60906	3.26153	0.0992825	0.960773
23716824..23720346	0.279802	0.238815	0.322865	0.3861	0.12627	0.151411	0.3656	0.112756	0.718268	-0.104409	3.2522	0.0993754	0.960773
21716913..21731788	0.970448	0.94782	1.26286	1.18019	0.942964	1.10593	0.779248	0.854507	0.26771	3.90961	3.24718	0.0996055	0.960773
Dgat2	2.14425	1.0671	0.73103	1.98768	1.11354	1.07566	1.05584	0.608795	0.648663	0.731039	3.24628	0.0996469	0.960773
nvy	1.01696	0.845006	0.712468	1.15621	1.40576	1.01012	1.31721	1.10814	-0.348569	1.93126	3.2453	0.0996919	0.960773
CG12811	9.17134	9.1205	16.8081	11.8704	8.13926	8.37761	10.8814	9.5147	0.370479	3.40228	3.2432	0.0997882	0.960773
Grip71	3.25526	2.8553	3.35323	3.16888	2.91874	2.23266	2.97432	2.68513	0.249592	2.75077	3.24095	0.0998921	0.960773
Dip-C	43.1256	36.0009	43.1428	39.4159	39.7954	35.9461	34.4215	34.0338	0.190772	6.22316	3.24025	0.0999242	0.960773
CG8560	418.961	423.192	403.636	399.961	428.41	586.272	522.335	423.464	-0.22944	9.46293	3.23904	0.09998	0.960773
CG31126	28.9909	17.6337	24.4199	23.4698	21.5501	18.4464	21.8677	16.0825	0.304473	3.67478	3.23502	0.100165	0.960773
Oat	3.34718	2.3194	4.52234	3.30874	2.41046	1.833	2.714	3.25722	0.425716	2.17189	3.23066	0.100367	0.960773
id-Dmel_CG3653	1.44179	1.80184	0.838836	1.0004	1.67803	1.80783	1.90599	1.42044	-0.398041	2.97514	3.22967	0.100413	0.960773
CR42719	1.0779	0.614658	0.971718	0.871255	1.25663	0.892207	1.45961	1.55374	-0.521084	0.120575	3.22805	0.100488	0.960773
Aef1	25.4338	30.8726	24.4126	27.8991	27.4658	36.0271	30.477	34.0571	-0.215478	6.88904	3.21987	0.100868	0.960773
CG12155	10.8715	14.657	9.47333	12.2979	13.747	16.1576	13.6062	13.4937	-0.247184	5.13223	3.21934	0.100893	0.960773
CR44347	0.754756	0.95808	1.17384	0.979357	0.52029	0.637405	0.278208	1.07217	0.643943	0.677876	3.2172	0.100993	0.960773
CG7215	39.5448	30.1331	39.2243	37.3093	34.6095	29.1404	31.8556	32.7078	0.214236	5.63889	3.21549	0.101073	0.960773
Prx5	39.5448	30.1331	39.2243	37.3093	34.6095	29.1404	31.8556	32.7078	0.214236	5.63889	3.21549	0.101073	0.960773
CG42404	0.321658	0.324916	0.185581	0.342846	0.482133	0.324564	0.465322	0.358778	-0.442701	1.00459	3.21342	0.101169	0.960773
CG9743	665.872	787.991	728.654	660.155	725.292	863.871	973.246	806.291	-0.222637	10.3932	3.211	0.101283	0.960773
Tango9	9.40181	8.80703	12.6769	11.1186	9.48718	8.2474	9.32945	9.23444	0.235577	5.17146	3.21028	0.101317	0.960773
CG7028	39.0341	37.4767	21.1025	28.9413	41.9148	40.0818	38.1705	38.8056	-0.305423	6.83815	3.20986	0.101336	0.960773
Efa6	7.5345	9.53473	6.76503	8.22349	9.65318	9.83553	9.2383	8.83575	-0.205934	6.16634	3.20756	0.101444	0.960773
Rpn7	427.37	400.001	387.624	380.507	479.614	443.211	469.906	437.338	-0.173333	9.21965	3.20615	0.10151	0.960773
Npc1b	97.2203	176.373	144.255	102.515	113.846	205.432	217.37	168.659	-0.41987	9.24748	3.20595	0.101601	0.960773
rudhira	76.3183	86.1479	46.1876	60.8848	105.463	93.7247	82.6534	67.4379	-0.350248	9.86251	3.20272	0.101672	0.960773
CG12990	0.450361	0.448252	0.393692	0.719554	0.229106	0.313281	0.539938	0.249176	0.617654	0.0481161	3.201	0.101753	0.960773
CG1113	0.81411	0.90298	0.736789	1.15925	1.19102	1.19797	1.17289	1.15048	-0.357414	1.09566	3.19447	0.102061	0.960773
Nopp140	24.9604	33.3026	21.9789	24.3513	29.785	35.4323	28.2855	32.2586	-0.244336	6.5395	3.19361	0.102101	0.960773
id-Dmel_CG17941	0.134528	0.17442	0.130722	0.154961	0.217917	0.112524	0.336821	0.224532	-0.556278	0.791784	3.19313	0.102124	0.960773
CG8500	0.708646	0.903512	0.471755	0.569398	0.804962	0.962564	0.710331	1.16989	-0.433201	1.49717	3.19299	0.102131	0.960773
yip7	3871.08	3801.84	4725.73	3987.4	3577.58	3774.79	3274.27	3762.51	0.211928	11.7652	3.18929	0.102306	0.960773
Reg-2	30.7899	27.5991	36.1519	35.2157	31.7053	27.6615	25.001	28.9996	0.22002	4.75007	3.18829	0.102354	0.960773
smp-30	70.9065	29.3601	36.3177	45.5701	42.402	38.3037	16.577	24.8893	0.606108	5.9908	3.26012	0.102445	0.960773
CG30008	3.78942	3.00641	1.86312	2.95025	3.96445	3.57845	4.15938	3.67315	-0.377417	1.73126	3.1845	0.102534	0.960773
CR44526	8.32345	7.95008	10.655	6.79241	7.39897	5.16714	6.30927	7.93603	0.354589	1.9093	3.18363	0.102575	0.960773
CG33099	16.0265	7.99686	8.291	12.6989	10.6459	8.59341	7.77645	7.71266	0.402264	3.64601	3.18165	0.102669	0.960773
Tl	0.195757	0.12279	0.155295	0.170398	0.193983	0.226845	0.195927	0.305686	-0.492776	0.112254	3.181	0.1027	0.960773
Shawn	2.95664	3.11525	3.4557	3.32083	3.27342	2.35781	2.65936	2.84122	0.231815	3.32958	3.18003	0.102747	0.960773
Tyler	2.95664	3.11525	3.4557	3.32083	3.27342	2.35781	2.65936	2.84122	0.231815	3.32958	3.18003	0.102747	0.960773
MsrA	204.692	142.595	172.621	171.039	162.454	132.536	172.201	111.982	0.281352	7.74995	3.17955	0.102769	0.960773
Bet1	16.624	16.6958	21.1156	16.2813	15.2639	13.9378	15.9632	16.5323	0.220732	4.03606	3.17459	0.103006	0.960773
CR44392	2.69245	4.44662	2.20231	3.83125	5.30829	3.94191	5.61833	3.37337	-0.442697	1.89749	3.17366	0.103051	0.960773
CG7367	1.01132	1.11789	1.86266	1.1802	0.906927	0.927241	1.22746	0.710189	0.474463	0.912131	3.17222	0.10312	0.960773
9973781..9980842	1.3238	1.08866	2.94597	2.7996	1.69658	1.64982	1.13249	0.657694	0.692801	3.56145	3.24378	0.103128	0.960773
CG8405	21.9298	27.6412	20.2275	22.156	25.4199	29.3886	26.7343	25.9589	-0.203294	6.79841	3.17046	0.103204	0.960773
CG8206	61.348	52.407	49.3861	54.586	59.0883	41.4032	44.5272	43.6747	0.232755	5.91717	3.17001	0.103226	0.960773
CG17147	2.12734	1.68555	3.81133	2.67323	1.80132	1.48282	2.24126	1.9905	0.475336	1.36833	3.16947	0.103252	0.960773
CG13397	1.3368	1.11969	0.84713	1.50427	1.28764	0.831989	0.805097	0.726541	0.424615	1.64639	3.16529	0.103453	0.960773
drk	21.2851	26.9734	18.2589	21.7331	26.3043	27.2171	23.8532	26.8954	-0.218269	6.14729	3.15964	0.103725	0.960773
N	1.73872	2.69825	0.939896	1.77645	2.69976	2.75493	2.41991	2.02909	-0.446698	4.43693	3.17245	0.103825	0.960773
CG12056	16.7675	9.59951	15.9564	12.1615	12.523	9.73181	10.9809	11.1057	0.323798	3.56464	3.15644	0.103879	0.960773
CG9135	5.90613	5.58105	3.52926	4.07875	6.93461	5.168	6.65638	5.47287	-0.317855	3.71283	3.15507	0.103945	0.960773
CR44989	7.6451	8.02456	12.2567	9.35536	6.43609	6.9291	8.15761	8.32186	0.342466	2.00038	3.15443	0.103976	0.960773
CG10628	6.33935	5.55251	7.19797	5.95331	6.38537	4.56719	5.20727	5.11717	0.260432	2.87187	3.15306	0.104043	0.960773
su(f)	4.83198	4.02354	3.70086	4.61799	4.07359	3.67934	3.33923	3.84241	0.226815	3.60465	3.15181	0.104104	0.960773
23596846..23599714	0.155167	0.242692	0.102313	0.143336	0.392801	0.136998	0.459381	0.170411	-0.804042	-0.489755	3.1518	0.104104	0.960773
Obp18a	5.71848	5.33597	6.24865	5.08545	4.40403	5.66086	4.52979	3.83001	0.303245	1.92826	3.15156	0.104116	0.960773
CG6028	88.6036	72.2239	101.097	85.4764	84.1582	71.1262	76.8748	72.3729	0.216041	6.47642	3.15131	0.104128	0.960773
ND4L	10.1623	7.47728	9.20454	7.93549	3.2612	5.88509	10.2934	3.78023	0.603659	1.11716	3.15064	0.10416	0.960773
RpS11	480.001	395.282	457.735	434.011	411.299	386.2	379.692	408.17	0.181736	8.49649	3.14963	0.104209	0.960773
RpL17	204.628	171.401	263.862	225.956	211.915	166.969	184.193	178.18	0.250624	7.8142	3.1487	0.104254	0.960773
VhaM9.7-c	19.8364	15.9428	18.3028	15.8166	16.1572	12.2496	13.7759	17.4405	0.254787	3.78641	3.13767	0.104792	0.960773
Naa35	6.9132	7.02729	6.96557	7.42553	6.57606	6.38013	6.32343	6.36651	0.16769	4.10411	3.13736	0.104807	0.960773
Arl1	78.6296	62.7302	76.4454	67.9583	67.0794	59.0774	64.9402	63.0611	0.194608	5.86671	3.13512	0.104917	0.960773
Fem-1	8.41977	9.53939	9.81775	10.5994	7.36769	9.93461	7.98349	8.18676	0.219734	4.69437	3.13083	0.105127	0.960773
CG5913	8.96659	8.46495	9.72388	8.40387	8.59497	11.9116	11.9267	10.2321	-0.240101	3.91098	3.13031	0.105152	0.960773
CG15152	142.95	113.981	140.072	123.811	128.702	112.341	106.482	114.157	0.199764	6.37327	3.12882	0.105225	0.960773
CG8907	346.725	392.007	294.265	338.862	401.487	402.424	382.538	409.291	-0.195243	9.83662	3.12692	0.105318	0.960773
id-Dmel_CG10659	743.644	531.445	806.392	607.502	645.703	564.048	453.391	591.691	0.280248	4.76973	3.12577	0.105375	0.960773
Gip	46.7395	35.3618	39.3814	43.194	41.9836	34.8398	27.9688	36.2325	0.249945	5.25352	3.12454	0.105436	0.960773
Lsd-1	10.7076	6.29084	4.58651	7.11748	6.00696	5.81549	5.9449	2.88419	0.502063	3.6056	3.13503	0.105638	0.960773
RabX4	1.52703	2.45863	3.13541	2.79248	1.75928	1.88355	2.13653	1.87743	0.393211	1.66287	3.11822	0.105748	0.960773
Ubc2	15.3908	14.7765	10.1669	11.7431	16.7904	14.7355	16.0143	15.1563	-0.243291	5.01533	3.11747	0.105785	0.960773
gom	1.13824	1.36994	1.36932	1.32508	1.85212	1.36846	2.14444	1.48944	-0.372833	1.02852	3.11554	0.10588	0.960773
CG15773	27.6676	20.0614	24.119	26.7094	25.6713	19.3348	18.5324	20.9415	0.249116	5.35589	3.11373	0.10597	0.960773
Hil	1.07153	1.02909	0.889374	1.06597	1.06949	1.31951	1.4875	1.16519	-0.289808	1.9676	3.11351	0.105981	0.960773
Vps26	71.0989	74.6117	58.2197	61.2016	74.4387	80.9897	77.352	74.1391	-0.188064	7.50605	3.11268	0.106022	0.960773
CR45149	2.15653	2.43052	5.75754	4.12242	2.28734	2.38934	2.35009	3.00692	0.546382	1.23494	3.11235	0.106038	0.960773
CG12355	5.20571	4.33397	4.20482	4.61768	4.49096	4.00248	3.14657	3.93945	0.262405	2.65149	3.11188	0.106062	0.960773
CG31712	28.708	31.4823	24.6705	26.7065	32.0223	33.7715	31.8596	30.6632	-0.178627	6.56552	3.111	0.106105	0.960773
CG15201	2.73113	1.54255	0.900419	2.71697	1.39489	1.32049	1.34761	1.0623	0.649882	-0.220907	3.10778	0.106265	0.960773
CG5676	47.9247	41.8767	54.394	50.4322	46.7794	38.9542	42.6519	43.7889	0.202178	5.14327	3.10602	0.106353	0.960773
CG18131	0.939334	1.04747	0.401445	0.830632	0.713833	0.43003	0.45881	0.618492	0.565325	0.386119	3.10537	0.106385	0.960773
21653247..21656493	0.215448	0.375269	0.271207	0.243557	0.283139	0.328562	0.571953	0.451718	-0.538269	0.234564	3.10422	0.106443	0.960773
Exo84	73.4785	83.9613	50.6272	62.4073	86.2363	82.5119	83.7664	74.9091	-0.2528	7.38968	3.10359	0.106474	0.960773
RASSF8	10.7941	13.6049	7.68297	10.3138	14.2531	12.7233	13.2604	11.7451	-0.270954	5.33817	3.10296	0.106505	0.960773
ICA69	1.04467	1.07018	1.142	0.856924	1.2307	1.27833	1.64012	1.19762	-0.354854	1.07975	3.10054	0.106626	0.960773
CR44265	1.35311	2.22904	0.69394	1.53305	3.43539	1.89156	1.84113	1.91432	-0.609254	0.715198	3.09957	0.106674	0.960773
Duba	13.7096	17.0261	11.982	13.2525	16.6635	17.1777	15.3598	16.4503	-0.207517	5.70972	3.09939	0.106684	0.960773
U4-U6-60K	14.7403	13.4768	11.7315	13.8799	18.4453	13.7782	14.9041	16.3029	-0.211377	4.91647	3.09913	0.106697	0.960773
CG31998	5.65774	7.23841	3.21516	5.46969	7.22072	7.49287	6.56177	6.58147	-0.345839	5.20784	3.09595	0.106856	0.960773
CG14184	28.6561	34.1721	46.7474	34.509	28.836	29.7023	31.0193	32.9321	0.257395	4.66495	3.09579	0.106864	0.960773
SMC3	22.9627	27.1788	16.5479	22.4816	26.0195	28.2075	27.0329	25.7377	-0.240665	6.62247	3.09525	0.106891	0.960773
22996363..23003538	0.0797614	0.169802	0.061358	0.105797	0.231433	0.133019	0.192011	0.110713	-0.640611	0.0556881	3.09334	0.106987	0.960773
RpL24	151.374	110.864	137.893	138.786	131.051	113.853	115.458	115.077	0.207009	7.32735	3.09214	0.107047	0.960773
SPARC	33.6251	27.3934	37.8225	33.3189	30.2491	31.254	25.8385	28.1906	0.219186	5.22032	3.09205	0.107051	0.960773
CycB	1.55495	2.19946	1.58955	1.45345	2.61818	1.84278	1.84815	2.26644	-0.31017	2.56326	3.09162	0.107073	0.960773
CG11134	24.6201	19.5861	22.681	26.0273	21.5229	18.4796	20.2219	21.4671	0.210978	4.37616	3.09086	0.107111	0.960773
CG6972	4.76487	6.94244	8.47172	6.19122	4.648	5.4733	6.43501	4.74238	0.329458	2.97351	3.09026	0.107141	0.960773
CG9801	4.35389	4.18646	2.53706	3.53594	5.45472	4.05124	4.65801	4.18392	-0.302428	3.91845	3.08889	0.10721	0.960773
Pgant6	109.324	149.859	106.572	113.428	131.912	151.965	141.251	140.386	-0.217517	8.52172	3.08729	0.107291	0.960773
CR45531	0.241478	0.220318	0.265976	0.251144	0.44019	0.242275	0.361885	0.348076	-0.481557	-0.120259	3.08544	0.107383	0.960773
CG9568	639.47	548.567	767.058	725.256	631.076	501.946	629.959	556.998	0.234229	8.65445	3.08356	0.107479	0.960773
id-Dmel_CG42314	2.06099	1.27598	1.4439	1.61095	3.15787	2.72949	1.73343	1.83907	-0.538307	-0.119821	3.08172	0.107571	0.960773
Ace	4.55225	4.23896	4.68557	5.37239	3.57712	4.13186	2.87412	5.05975	0.292419	5.19516	3.07713	0.107803	0.960773
toe	0.755207	0.507708	0.810284	1.31805	0.741413	0.900733	2.8456	1.36233	-0.763283	1.50353	3.08972	0.107887	0.960773
IKKbeta	5.6746	6.34343	5.23541	5.82316	6.48438	6.60119	6.64568	6.86546	-0.181351	3.95446	3.07422	0.107951	0.960773
prt	0.671896	1.41261	1.8877	0.712002	1.11706	2.08917	1.91253	2.06332	-0.60038	1.71766	3.07366	0.10798	0.960773
CG33229	318.997	432.085	179.067	303.69	415.462	499.696	374.678	352.327	-0.391596	9.29764	3.06627	0.108355	0.960773
pall	13.2361	14.6984	11.318	13.9543	18.0742	15.2479	19.2489	12.3139	-0.261612	4.1574	3.06166	0.10859	0.960773
tara	5.09557	6.4597	5.381	6.56773	5.32046	5.2333	5.54036	4.70153	0.199784	4.75202	3.06158	0.108595	0.960773
18710814..18718708	0.161105	0.117591	0.158015	0.144243	0.08264	0.0853445	0.144172	0.108371	0.487483	0.0642672	3.06107	0.108621	0.960773
Mtpbeta	54.1747	43.3266	57.399	51.5108	52.2945	41.3456	46.3126	40.6657	0.218971	6.27018	3.05987	0.108682	0.960773
CG13366	12.7296	14.8726	10.4683	13.5204	14.8657	15.69	14.3819	15.3446	-0.201955	6.27496	3.05939	0.108707	0.960773
RpL19	256.979	221.394	255.551	263.967	239.889	215.625	210.755	230.445	0.179477	8.33359	3.05798	0.108779	0.960773
tacc	102.695	94.8854	80.3983	82.3599	116.513	100.653	111.696	94.7673	-0.2087	9.25643	3.05414	0.108976	0.960773
Atac1	14.5289	14.3408	18.2566	16.4081	12.393	13.3298	15.5126	14.2599	0.218555	4.19969	3.05273	0.109048	0.960773
ari-1	25.7489	33.7357	23.2345	26.1541	32.4774	35.06	30.862	29.8524	-0.214105	7.15592	3.05178	0.109097	0.960773
Cyp311a1	2.86038	1.98111	2.26465	3.07401	2.51194	2.35954	1.49474	1.08343	0.475722	1.7732	3.05069	0.109153	0.960773
CR45152	165.594	146.746	74.2375	112.345	178.185	171.667	151.61	150.5	-0.361759	6.4354	3.04961	0.109208	0.960773
Ykt6	47.6432	54.4688	75.8819	58.7444	44.4545	52.786	49.8345	54.2493	0.257057	6.33248	3.04813	0.109284	0.960773
CG12643	69.5798	44.0947	32.3858	49.8891	47.0592	36.2168	36.0549	36.5141	0.357363	5.50615	3.04763	0.10931	0.960773
5-HT2A	0.370293	0.439736	0.691792	0.672426	0.657815	0.555269	0.791753	1.01668	-0.452957	1.83636	3.04544	0.109423	0.960773
Hr96	35.8487	46.0566	36.8863	32.1132	39.5246	45.7379	51.0186	42.9995	-0.22677	6.86956	3.04465	0.109464	0.960773
CG32444	20.6191	18.4044	19.6073	25.4054	24.0264	17.5467	11.6305	13.6073	0.357996	4.59699	3.0432	0.109539	0.960773
CG10947	5.08233	5.25085	4.08486	4.87061	5.73436	5.36455	6.38662	5.19227	-0.209329	4.01502	3.04175	0.109614	0.960773
Echs1	47.0183	36.8585	45.9957	45.114	43.9307	34.3192	36.2696	39.2563	0.212518	5.53242	3.04034	0.109687	0.960773
unk	4.93957	5.69417	2.70204	4.37906	6.53774	6.12694	5.10747	5.06544	-0.342634	5.00389	3.03754	0.109832	0.960773
CG31266	98.885	59.1047	90.7141	80.3096	77.2921	63.9246	71.2796	64.8063	0.273964	6.23699	3.03692	0.109864	0.960773
CG31809	5.53735	2.64533	2.79715	2.83706	3.74585	2.07728	1.8805	2.14674	0.51795	2.00752	3.03652	0.109884	0.960773
Rpb5	9.07638	10.1401	14.1069	13.2061	9.84711	10.2487	7.85195	10.6207	0.293917	3.46216	3.03488	0.10997	0.960773
Rok	28.177	36.1892	20.9967	27.534	35.4151	37.7347	32.1115	31.9099	-0.258957	7.84902	3.03457	0.109986	0.960773
CG31638	21.6707	19.7808	12.0632	16.506	22.0485	22.2536	22.428	19.8924	-0.283046	5.97489	3.03295	0.11007	0.960773
CG30091	1.5133	1.10456	1.13503	1.01618	0.952678	1.03548	0.89095	0.872533	0.369849	0.888442	3.03154	0.110143	0.960773
Gapvd1	30.9255	38.3126	23.3495	29.3652	37.6785	35.6449	38.5494	34.1891	-0.237864	7.60812	3.03017	0.110215	0.960773
Nipped-A	1.775	2.53624	1.70098	2.39467	2.27077	2.64686	2.57697	2.64477	-0.248573	4.7411	3.02994	0.110226	0.960773
CG4101	15.8649	12.4158	16.8073	13.4016	12.4366	11.5318	14.3005	11.1713	0.26677	2.66347	3.02704	0.110378	0.960773
RpL7	147.983	146.079	202.671	181.939	146.427	139.941	156.981	150.035	0.218399	7.53754	3.02384	0.110545	0.960773
Dh44	1.16496	1.03873	5.2701	1.23794	1.33343	1.63633	0.77316	0.661513	1.00082	1.99242	3.10953	0.110549	0.960773
CG1607	0.799201	0.856775	1.44094	1.36153	0.447224	0.661517	0.498758	1.3344	0.619691	1.585	3.01752	0.110876	0.960773
23594713..23600753	0.0842197	0.17289	0.0485907	0.0837828	0.284734	0.074358	0.238003	0.121398	-0.835432	-0.146931	3.01616	0.110947	0.960773
GstE8	5.10132	4.11131	3.89159	5.46956	4.33482	3.25287	3.79094	4.08514	0.290357	2.27387	3.0124	0.111144	0.960773
CG12581	0.442531	0.302816	0.678612	0.42865	0.304114	0.236484	0.307161	0.470019	0.51284	1.14795	3.00941	0.111302	0.960773
CG3902	50.2552	41.0742	63.7539	52.7287	32.5193	46.5138	46.4141	47.4643	0.288856	6.24097	3.00778	0.111388	0.960773
ATP8	296.391	288.686	347.442	330.587	123.203	237.423	368.69	198.431	0.466665	5.47646	3.02517	0.111426	0.960773
CG7231	72.9547	58.7582	64.5788	61.0975	59.5476	60.1476	56.5266	55.0539	0.17949	6.85758	3.00478	0.111547	0.960773
Fmo-2	76.8281	63.9901	62.5509	78.4649	60.7753	57.5001	55.2424	72.6529	0.219577	6.78032	3.00159	0.111715	0.960773
CG13369	43.002	27.2835	37.098	35.3754	32.1805	24.8253	32.6304	31.337	0.265416	5.27967	3.00031	0.111783	0.960773
CR44898	1.40587	2.65864	3.1265	3.48373	1.59726	2.21168	2.38378	1.52293	0.487711	1.54485	3	0.111799	0.960773
SMC5	3.36109	4.65155	4.24879	4.77128	4.70207	5.81835	4.90928	4.9174	-0.234303	3.98087	2.99659	0.11198	0.960773
dpr21	0.512358	0.905708	0.591212	0.76455	1.01543	0.989545	1.1161	0.83085	-0.481013	-0.152102	2.99486	0.112072	0.960773
GAPsec	28.0912	31.2667	27.6617	26.5932	31.8846	30.0386	34.8426	33.4067	-0.172968	5.55713	2.98857	0.112407	0.960773
RpS26	319.33	318.944	466.643	454.813	313.08	315.134	338.554	355.699	0.262504	9.39322	2.98812	0.112431	0.960773
Xpc	8.89428	13.665	9.23	11.3762	12.4889	13.5259	12.7257	12.8174	-0.234803	5.83741	2.98811	0.112432	0.960773
CG31473	1.19932	1.33082	1.3839	1.12861	0.99762	0.715464	0.427474	1.30824	0.571061	0.135291	2.98742	0.112468	0.960773
betaTub60D	308.978	439.015	360.495	416.509	432.999	427.89	509.891	439.154	-0.225077	10.0342	2.98431	0.112634	0.960773
Diedel3	611.966	252.731	237.966	312.935	358.561	261.068	142.112	154.728	0.658728	9.63395	3.06474	0.112667	0.960773
CG1910	100.066	103.287	64.1165	88.3634	105.165	120.654	99.2902	106.514	-0.255926	8.29757	2.97925	0.112906	0.960773
CG10301	2.92543	3.01723	2.93537	2.02453	2.13527	2.30213	2.45621	1.83341	0.343689	1.32988	2.97802	0.112972	0.960773
wge	25.5152	29.4332	23.6886	25.8666	27.5398	30.2087	31.0597	30.9062	-0.173613	7.50281	2.97437	0.113168	0.960773
CR46104	16.8562	13.002	20.4936	19.5724	15.0762	12.2064	13.2237	17.2713	0.300121	3.2647	2.97305	0.113239	0.960773
Corp	1.56899	1.24064	0.844884	1.04057	1.73159	1.5238	2.41403	1.10567	-0.499923	0.855306	2.97223	0.113283	0.960773
Arfip	13.9315	13.6952	10.0153	12.2492	14.9614	14.3456	14.1099	15.0192	-0.204005	4.76453	2.97066	0.113368	0.960773
CR44703	13.5397	8.87969	17.8201	12.9627	10.8524	10.818	9.7236	11.7744	0.326518	3.84439	2.96715	0.113557	0.960773
Nepl16	0.87801	1.12583	1.39649	1.34559	0.64182	1.13137	0.849434	1.02616	0.398456	1.52194	2.96483	0.113683	0.960773
CG7470	173.058	135.042	127.107	162.79	161.149	125.678	106.628	112.889	0.266679	9.33814	2.96462	0.113694	0.960773
CG10663	2.8953	4.08579	2.1502	3.52809	4.52229	3.70616	3.75601	3.94716	-0.307357	3.50989	2.96431	0.113711	0.960773
CR45955	13.0127	11.4839	11.6847	15.7225	15.1813	9.94316	6.73067	8.45769	0.391802	2.96463	2.96223	0.113824	0.960773
id-Dmel_CG7900	0.436256	0.563874	0.167799	0.313439	0.610309	0.540311	0.587888	0.448338	-0.531049	1.3071	2.96148	0.113864	0.960773
CR44281	11.6541	10.5848	11.1963	10.387	9.24614	9.45138	10.2329	9.52684	0.212243	2.6473	2.95863	0.114019	0.960773
Sec61beta	163.568	122.348	149.27	130.847	132.069	118.184	128.06	123.771	0.19876	6.72664	2.9577	0.114069	0.960773
MCTS1	10.2163	7.27044	8.72358	7.39379	7.9084	7.53171	6.73658	6.5777	0.250313	3.28865	2.95506	0.114213	0.960773
cac	0.978775	1.61812	1.28328	1.26024	1.0994	2.02973	2.2334	1.44545	-0.385492	4.15868	2.94981	0.114499	0.960773
CG7222	28.082	28.737	24.1292	24.6392	37.0566	29.2631	31.9973	26.175	-0.212523	5.50888	2.94873	0.114558	0.960773
CG6067	78.0953	74.8374	93.3459	79.9144	65.7793	69.529	61.4392	86.7658	0.226166	6.74799	2.94831	0.114581	0.960773
Cht9	15.4198	10.3953	21.7435	15.3126	12.8741	12.7437	11.5326	13.6071	0.333873	4.0506	2.94737	0.114633	0.960773
CG5800	14.4395	13.0208	13.7786	12.6915	15.8646	14.5094	15.2315	15.9999	-0.167316	5.25837	2.94705	0.11465	0.960773
Atf-2	7.80223	9.52725	10.7166	8.86387	8.04617	8.22057	8.52649	7.49764	0.215877	3.55226	2.94606	0.114704	0.960773
Mipp1	318.456	302.391	305.155	421.401	293.911	231.475	286.132	334.963	0.257247	9.34061	2.94515	0.114754	0.960773
CG18067	35.3313	23.2095	48.4431	24.3142	25.8574	21.6158	21.6332	31.835	0.40576	5.47788	2.94845	0.114929	0.960773
dmGlut	30.0549	26.1059	21.4163	25.1006	24.5345	23.4227	21.7183	20.8457	0.206605	5.8747	2.94114	0.114974	0.960773
CG11839	18.2193	12.7014	17.3805	14.3409	14.5445	11.6531	13.3287	14.0357	0.251702	3.61028	2.93939	0.11507	0.960773
CG6276	9.47255	9.62243	9.36603	8.91546	8.60466	8.37891	7.21477	9.15351	0.188282	4.00301	2.93893	0.115096	0.960773
CG4653	212.071	170.83	217.734	197.575	192.121	165.782	164.361	187.916	0.19431	7.40049	2.9365	0.115229	0.960773
pbl	2.3872	2.55441	1.18689	1.91518	2.83689	2.6613	2.37827	2.53715	-0.347697	3.7428	2.93646	0.115231	0.960773
EMC10	11.0924	8.57424	11.7685	10.667	10.1154	8.51493	8.76553	9.11967	0.230661	3.3514	2.93598	0.115258	0.960773
CG30089	0.892109	0.96446	1.69218	1.24612	0.837722	0.927914	0.909433	1.10977	0.36274	2.49554	2.93355	0.115391	0.960773
loh	1.94144	1.61655	2.03362	1.98763	1.77552	1.88885	1.38494	1.28603	0.282706	2.56826	2.93328	0.115407	0.960773
Spt7	3.10937	2.52663	4.03641	3.43157	2.46949	2.6166	2.47135	3.12805	0.316864	1.98232	2.93223	0.115465	0.960773
CR45517	6.81977	7.42164	5.59388	6.98874	8.39118	6.96429	8.47528	8.48801	-0.243722	2.53157	2.93182	0.115487	0.960773
CG18586	1.5534	2.06924	1.59531	1.74624	1.85444	2.41386	2.59004	1.86595	-0.302117	2.02774	2.93056	0.115557	0.960773
CG32687	125.627	132.629	116.098	118.159	108.416	121.704	103.946	111.086	0.169093	8.36073	2.93056	0.115557	0.960773
MFS14	27.4656	21.1148	24.0597	22.099	20.7541	21.1756	19.7505	22.518	0.195159	6.20322	2.92751	0.115725	0.960773
Gel	13.648	11.9622	16.8462	13.5772	12.5443	12.6486	10.9487	12.9342	0.216173	5.47435	2.92455	0.115889	0.960773
schlank	251.343	246.653	263.307	245.612	218.745	238.935	232.006	224.341	0.16354	9.2231	2.92377	0.115932	0.960773
CG9213	16.9853	13.8989	11.4056	11.4269	18.4625	15.9075	15.7954	14.7174	-0.246826	5.11911	2.91898	0.116199	0.960773
mRpL43	16.3255	19.1189	20.3376	17.1296	15.832	16.3501	16.5262	16.1955	0.19091	3.76047	2.91843	0.116229	0.960773
CG17928	6.14393	4.11192	5.60049	5.36481	4.99365	5.23745	3.84627	2.70218	0.364191	2.98347	2.9168	0.11632	0.960773
if	2.3805	2.6256	4.44993	3.04702	2.37311	2.64821	2.49656	2.70441	0.313586	4.10007	2.91513	0.116413	0.960773
pHCl-2	13.2944	13.7493	17.4372	13.2918	12.3679	13.6584	11.0472	13.4883	0.216231	5.69386	2.91466	0.116439	0.960773
usp	55.3067	61.7481	31.8248	43.8888	68.0694	65.7327	54.8494	54.5356	-0.312125	7.36921	2.91414	0.116468	0.960773
CG8191	5.15704	4.13897	7.2594	5.49218	3.91163	4.38314	5.09979	4.66783	0.310556	2.90965	2.91212	0.116581	0.960773
cert	63.7718	68.0678	50.0278	61.8266	77.9966	69.6933	67.4165	67.794	-0.191389	7.57551	2.91193	0.116592	0.960773
ND5	247.237	240.678	277.082	232.155	85.9469	177.278	283.976	176.543	0.483434	8.53269	2.93296	0.116598	0.960773
CG17047	1.17956	1.33388	0.805156	1.14038	0.588792	0.821415	0.970288	1.00579	0.420844	0.956486	2.91075	0.116658	0.960773
Gycbeta100B	0.414487	0.59936	0.30682	0.630175	0.284457	0.214048	0.412545	0.458428	0.536693	0.807189	2.91073	0.116659	0.960773
CG33543	0.549627	0.396993	0.515301	0.523993	0.704836	0.606585	0.765832	0.550177	-0.378968	0.733974	2.9106	0.116666	0.960773
CG10725	25.1191	21.0634	64.5881	31.9944	10.3595	17.6589	8.00134	38.0914	0.967804	4.57867	3.07829	0.116684	0.960773
Cyp6d2	27.7669	29.82	37.6934	34.6725	44.7124	32.065	38.383	39.9549	-0.230128	5.96994	2.9069	0.116873	0.960773
9726669..9734162	0.118808	0.147111	0.161574	0.18573	0.0791473	0.123628	0.111917	0.134558	0.468018	0.0759498	2.90417	0.117026	0.960773
Tsen34	12.268	10.2281	6.2645	8.24148	13.3816	11.1116	11.4568	11.1793	-0.322473	3.25446	2.90234	0.117129	0.960773
Stacl	0.688348	1.55823	0.986615	0.749378	0.870113	1.79648	1.74747	1.25847	-0.49214	4.15165	2.91959	0.117178	0.960773
CG15390	0.410741	1.15548	1.30338	1.56634	0.702307	0.604409	0.999532	0.46049	0.698517	-0.163333	2.90113	0.117197	0.960773
CG4984	1.30552	0.907922	1.31683	1.24426	1.11542	0.838294	0.954598	1.02646	0.304153	1.94508	2.89959	0.117284	0.960773
CR31451	6.57122	5.79124	6.9722	5.80853	6.77375	4.0774	4.38861	5.68908	0.290881	3.17963	2.89938	0.117296	0.960773
Prpk	14.3177	12.6342	16.7679	14.1159	13.2338	12.6789	12.8028	12.0749	0.211683	3.34574	2.89711	0.117423	0.960773
CR44045	7.58103	6.24428	11.0562	8.58916	4.12442	5.7637	8.92661	5.66617	0.470919	1.16564	2.89358	0.117622	0.960773
Mettl14	10.3508	8.86645	9.59679	10.1397	9.18993	7.42276	8.92012	8.9477	0.201088	3.69838	2.89159	0.117735	0.960773
CG12702	2.77567	2.92841	3.74537	3.30993	2.36949	2.53048	3.27898	2.69338	0.253769	3.38609	2.89067	0.117787	0.960773
az2	4.88228	6.88417	5.04836	5.66118	5.66223	7.78145	7.33165	6.42821	-0.253725	3.64545	2.88037	0.118371	0.960773
lin-52	8.69774	7.74361	7.77009	8.74566	8.48263	7.18384	7.18009	5.662	0.234703	3.39401	2.87913	0.118442	0.960773
CG13360	23.7247	12.3975	8.1716	17.5631	14.8745	12.2072	7.25019	8.61615	0.555056	4.39895	2.92827	0.118478	0.960773
Galphaf	48.1242	49.4712	56.918	47.1119	39.9753	47.7348	48.1393	44.2362	0.18636	6.44644	2.8757	0.118638	0.960773
didum	42.6014	64.8684	32.0929	46.2676	53.3744	68.7535	54.3101	58.0824	-0.315751	8.41425	2.8753	0.118661	0.960773
CG43783	5.66325	6.80597	3.45923	5.77893	8.24094	6.56555	6.29622	6.27727	-0.310781	5.06416	2.87478	0.118691	0.960773
CG4975	1.29285	0.864413	1.30962	1.26651	1.18736	0.827779	0.901773	0.910446	0.331991	1.80972	2.87424	0.118721	0.960773
IP3K2	47.0055	50.3215	52.5825	45.846	46.5789	56.3307	64.6402	62.3812	-0.209603	8.1731	2.87352	0.118763	0.960773
CG14232	43.5308	36.5714	38.0788	39.4039	43.0764	44.5623	46.7552	45.6605	-0.167885	6.40814	2.87243	0.118825	0.960773
CG8036	31.5436	28.2201	31.7784	35.5356	33.4553	26.7569	25.1249	27.1542	0.201723	6.36426	2.87236	0.118829	0.960773
CG3831	0.844359	0.803153	1.20234	0.786363	0.85451	0.555151	0.643074	0.707814	0.419214	0.555778	2.87149	0.118878	0.960773
CG11658	117.82	125.215	88.8215	110.421	136.544	142.348	122.974	117.92	-0.209596	8.35821	2.8691	0.119015	0.960773
CR46032	0.825927	1.75829	1.11188	1.04988	2.69605	0.850751	3.06885	1.32281	-0.708771	0.216602	2.86787	0.119086	0.960773
CG2889	12.1756	12.5942	6.22426	7.83085	15.0659	13.3999	11.5094	10.7888	-0.361949	4.6539	2.86698	0.119137	0.960773
CR45007	52.2824	54.0577	40.6774	42.8688	56.4807	57.1135	54.7656	52.3014	-0.193157	6.36121	2.8613	0.119464	0.960773
CG12379	13.4808	9.01339	17.4555	12.1824	11.5651	8.26798	12.1657	9.49338	0.354594	2.86654	2.86122	0.119468	0.960773
21723964..21731592	1.81728	1.80255	2.42402	2.2764	1.77263	2.14177	1.50377	1.65822	0.257086	3.88294	2.86101	0.11948	0.960773
Rpp14b	6.40458	3.94684	3.95445	3.80046	6.96876	6.34907	5.76847	4.80487	-0.372885	1.60164	2.8553	0.11981	0.960773
CG30187	0.910783	0.722587	0.7311	0.669695	0.701711	0.489473	0.48493	0.62788	0.422124	0.177022	2.85025	0.120102	0.960773
Jon65Aiv	4489.84	4756.05	6952.34	5340.63	4207.55	5065.48	4190.04	4784.71	0.263327	12.1362	2.84722	0.120278	0.960773
CG32344	13.4204	15.1413	17.6787	16.9086	13.5513	14.7148	14.2208	13.8039	0.189323	5.33282	2.84477	0.12042	0.960773
Ugt49B1	79.3686	67.0879	119.762	95.1342	75.3925	77.2137	74.6282	76.9844	0.273838	7.19178	2.84427	0.12045	0.960773
l(3)80Fg	4.75526	4.15937	3.39962	3.42453	4.72422	4.24408	4.95658	4.86764	-0.230956	3.73708	2.84266	0.120543	0.960773
CG3437	6.26927	5.07579	5.08345	5.56251	4.47745	3.88958	5.26717	5.10185	0.255969	2.53508	2.8392	0.120745	0.960773
Cbp53E	20.8755	25.5987	39.3168	26.9698	16.8958	27.3612	23.6563	22.4461	0.341843	6.13125	2.83615	0.120923	0.960773
Jon65Aiii	1836.05	2433.61	3457.32	2852.7	1893.61	2396.14	1949.94	2404.46	0.314531	11.0398	2.83308	0.121103	0.960773
CG11777	11.3857	8.5256	10.4685	10.6497	9.64577	7.44923	9.99882	7.75908	0.260973	2.74665	2.82796	0.121403	0.960773
CG17574	71.6564	63.4863	83.486	70.6776	71.2561	60.3394	61.0275	65.4616	0.190428	7.69335	2.82515	0.121568	0.960773
2022-09-05	1.49304	1.84872	2.00996	1.94503	2.12187	2.16564	2.84636	1.98133	-0.29819	1.89928	2.82124	0.121799	0.960773
RpL26	251.419	217.97	306.172	297.095	254.558	208.787	245.372	229.397	0.219161	8.21262	2.82092	0.121818	0.960773
Rbp9	8.27922	9.07026	9.26186	8.34231	7.20976	9.12239	7.54608	7.36414	0.184974	6.06056	2.82065	0.121834	0.960773
sob	4.44517	3.63343	3.8786	4.70076	3.47564	3.33328	2.21412	4.45889	0.329796	3.30833	2.81958	0.121897	0.960773
Glo1	60.5932	51.7378	68.1861	55.5339	56.265	47.9611	51.9198	53.6442	0.195528	5.32963	2.8145	0.122198	0.960773
dgt5	0.359458	0.454099	0.319062	0.522636	0.309459	0.34178	0.182327	0.345425	0.512921	-0.190429	2.81371	0.122244	0.960773
Lrt	0.399649	0.36463	0.380956	0.345718	0.494275	0.444901	0.417388	0.58442	-0.355471	0.706781	2.81359	0.122251	0.960773
Itgbn	20.9068	29.3854	21.3012	24.6247	27.854	32.3533	26.9673	26.1288	-0.213878	6.45019	2.81208	0.122341	0.960773
CG5070	7.96908	13.9357	4.14702	16.4384	21.6048	7.79472	14.3513	39.6038	-0.947336	3.68202	2.95668	0.122428	0.960773
Moe	502.018	534.161	403.146	499.122	551.931	579.044	545.489	576.215	-0.193813	11.2205	2.80882	0.122535	0.960773
Sugb	10.2037	7.87032	6.56242	7.99503	6.85274	7.93864	6.52256	6.84537	0.237187	4.86762	2.80765	0.122605	0.960773
CG12608	50.334	39.8554	59.9198	52.7351	45.8428	41.2609	46.8027	43.396	0.219873	6.26551	2.80095	0.123004	0.960773
1278430..1281474	3.95781	3.58242	4.77178	3.76067	3.65228	3.35607	3.31508	3.76316	0.214543	3.52911	2.79858	0.123146	0.960773
CG17343	3.56407	4.72522	7.32557	5.26297	5.14185	4.13009	3.25242	3.3179	0.419528	1.41933	2.7974	0.123216	0.960773
7707820..7713635	1.24656	1.30693	1.1482	1.18026	1.47875	1.62193	1.62232	1.13485	-0.238926	2.97586	2.79416	0.123411	0.960773
Cyp12b2	5.24617	6.08891	8.07144	6.07103	6.05778	6.04979	4.42078	4.86989	0.275234	3.39263	2.7934	0.123457	0.960773
kek1	0.109876	0.190472	0.367682	0.196751	0.184457	0.388041	0.419187	0.358995	-0.630206	0.7338	2.79259	0.123505	0.960773
c11.1	18.1543	26.51	12.0651	17.7695	24.1114	24.2419	23.4599	22.1788	-0.314244	7.02762	2.78932	0.123701	0.960773
Ing5	93.1712	97.2064	106.702	95.0815	99.6788	111.95	122.856	115.086	-0.173838	6.77988	2.78803	0.123779	0.960773
CR45865	22.3945	17.4248	23.6038	18.7099	17.5407	16.3484	20.1822	15.8374	0.256753	2.6544	2.78767	0.123801	0.960773
CG14407	41.3186	38.3929	59.6521	47.6866	38.3581	34.8413	44.5719	41.8098	0.253576	4.85955	2.78663	0.123864	0.960773
id-Dmel_CG42748-5	28.3912	44.0359	98.2824	59.8772	27.0086	37.0988	34.2328	55.1114	0.604532	1.45316	2.78611	0.123895	0.960773
CG6066	11.9345	12.716	10.1398	11.9133	15.4572	12.9548	12.8978	12.7647	-0.186683	4.29612	2.78522	0.123949	0.960773
Pal2	19.239	18.2835	15.9254	18.0134	17.9303	16.2307	15.2499	14.9601	0.1755	5.29238	2.78509	0.123956	0.960773
CR45102	15.8212	17.7035	16.6129	17.2666	12.4312	15.4225	16.5175	15.5457	0.192236	4.51213	2.78036	0.124243	0.960773
id-Dmel_CG9533-2	0.457261	0.490484	0.520506	0.577832	0.85869	0.343706	1.05356	0.665053	-0.486887	1.70148	2.77853	0.124353	0.960773
CG11000	0.149287	0.170257	0.247629	0.139231	0.200147	0.280089	0.333991	0.183807	-0.480207	0.598063	2.7781	0.124379	0.960773
CG33267	1.28564	1.68128	1.38461	2.21688	0.559557	1.36212	1.41291	1.19427	0.556036	0.124747	2.77748	0.124417	0.960773
RpL10	209.353	157.815	185.005	174.585	187.881	153.263	153.14	148.776	0.203054	7.72569	2.77626	0.124491	0.960773
colt	45.0761	33.3244	34.9071	40.0759	40.3769	30.3322	31.9979	30.9078	0.22571	5.73297	2.77332	0.124669	0.960773
Orc2	6.08868	7.24206	4.59801	6.18394	7.43271	7.76806	7.89757	6.06542	-0.250635	3.73747	2.77306	0.124685	0.960773
RpS10b	134.688	110.718	157.232	140.856	129.54	109.576	122.527	118.479	0.204791	7.63997	2.77166	0.12477	0.960773
btv	0.074405	0.0814622	0.04579	0.111028	0.0948379	0.135765	0.077098	0.159684	-0.550512	0.397715	2.77147	0.124782	0.960773
NetA	20.7739	19.6132	33.7725	25.9557	17.3344	22.8848	23.5831	18.5644	0.305609	6.25623	2.77141	0.124785	0.960773
uzip	0.618341	0.832134	0.731344	0.984214	0.749703	1.09187	1.23776	1.00272	-0.344296	1.9226	2.76942	0.124906	0.960773
CG7806	25.4155	35.8564	23.6816	29.4128	33.3188	36.0308	33.7431	31.6631	-0.214955	7.27327	2.76678	0.125068	0.960773
CG8142	5.03991	4.83531	5.87553	5.01377	4.70046	3.62403	4.94334	4.56855	0.243572	2.57663	2.76628	0.125098	0.960773
CR44201	31.9043	27.6568	34.3357	28.4673	29.9039	24.8669	26.0565	28.3906	0.189319	5.12054	2.76605	0.125112	0.960773
Sirt2	11.5503	8.93845	14.4681	11.2828	9.68217	9.43608	10.9852	9.62841	0.243796	4.62309	2.76392	0.125242	0.960773
Ero1L	139.685	178.243	153.181	162.595	148.099	214.01	184.472	205.4	-0.225733	8.5064	2.76239	0.125336	0.960773
alph	257.627	278.722	222.53	244.146	285.358	302.323	281.483	281.067	-0.17447	9.72625	2.76179	0.125372	0.960773
cl	379.624	289.876	401.358	308.689	337.239	263.221	328.696	264.726	0.235219	7.84926	2.76136	0.125399	0.960773
h	37.1092	51.4386	49.829	59.6358	32.1967	41.0722	47.7849	45.2922	0.272727	6.73464	2.76072	0.125438	0.960773
Picot	198.511	186.049	165.875	183.024	149.132	179.663	144.201	177.755	0.195855	9.15074	2.76007	0.125478	0.960773
CG14285	1.60759	1.20272	1.81791	1.5033	1.01954	1.24903	1.1509	1.32856	0.389	0.487708	2.75965	0.125504	0.960773
CG5608	3.40088	5.21024	4.80725	3.87662	5.24672	5.61746	4.95224	4.97025	-0.243009	3.42409	2.75846	0.125576	0.960773
HDAC1	21.2737	19.8603	22.4229	19.7038	18.263	18.3993	19.2076	19.7382	0.163222	5.40151	2.75817	0.125594	0.960773
ProRS-m	4.33898	4.55163	4.52302	5.19227	4.49637	4.09	3.8306	3.96816	0.20762	2.74341	2.75115	0.126026	0.960773
Sps1	4.92055	5.07362	5.13339	5.56557	4.43197	3.88316	5.6193	3.8864	0.239676	3.1934	2.75089	0.126042	0.960773
CG31287	8.81424	8.20476	9.63006	7.72517	7.99165	7.19109	8.17684	7.09776	0.198957	3.53756	2.75003	0.126095	0.960773
mRpS7	87.9392	66.5027	88.4291	71.3386	72.7344	63.4362	74.672	65.7122	0.210057	6.08414	2.74991	0.126102	0.960773
Leash	4.09977	4.02334	1.90383	3.44186	5.11062	4.2377	4.33293	3.83402	-0.352986	3.6283	2.74988	0.126104	0.960773
Scgdelta	0.91201	0.832094	0.695317	0.907279	0.751855	0.833976	0.613649	0.508628	0.329623	1.59401	2.74887	0.126167	0.960773
sage	1.42513	1.17835	1.61877	1.26267	0.768411	0.747088	1.5732	0.941527	0.466468	0.811363	2.74674	0.126298	0.960773
vkg	1.41314	2.0522	1.44444	1.88739	3.45681	2.57306	1.13311	2.35884	-0.460731	3.73301	2.75714	0.126383	0.960773
lds	4.56824	5.08506	3.43827	3.59814	5.18968	5.73699	4.80207	4.3899	-0.245904	4.03135	2.74262	0.126553	0.960773
CG1814	5.66502	5.57704	7.14249	6.21916	4.83718	5.31513	5.87442	5.5477	0.212726	3.57995	2.74217	0.12658	0.960773
CG10561	3.06825	3.12457	3.23649	3.08316	2.71707	2.73633	2.80269	2.84423	0.196287	2.61321	2.74192	0.126596	0.960773
COX1	5045.87	4034.73	4616.04	4220.2	3707.1	3791.91	4345.36	3997.37	0.202313	12.6638	2.73821	0.126826	0.960773
CG1142	26.388	19.0759	24.1258	21.4592	22.4621	18.8295	19.7609	18.9513	0.212601	4.28931	2.73751	0.12687	0.960773
eEF1gamma	450.09	469.325	692.279	621.728	458.302	455.01	493.592	503.44	0.249899	9.77971	2.73685	0.126911	0.960773
Eo	1.47718	0.539096	0.358847	1.57779	0.841114	0.617783	0.439419	0.508035	0.745419	0.756408	2.73615	0.126954	0.960773
CG11275	5.44621	5.73612	4.63061	4.12525	6.16656	5.21341	6.04835	6.35376	-0.229859	3.19383	2.7358	0.126976	0.960773
id-Dmel_CG17082-4	2.32017	3.50096	1.51024	2.81119	2.33035	1.83839	1.96142	1.57215	0.423177	1.29215	2.73291	0.127156	0.960773
CG8009	2.83715	4.8073	4.93196	4.21532	2.30242	3.9038	3.9221	2.79721	0.396555	1.7074	2.73171	0.127231	0.960773
CG17266	10.1908	8.59492	13.901	12.2631	9.17784	9.02846	10.0616	9.79299	0.263838	3.24592	2.7311	0.127269	0.960773
CR44986	36.3147	32.425	42.4828	38.1233	32.3371	32.5458	32.919	35.6862	0.18619	4.62768	2.72967	0.127358	0.960773
Tdc1	15.7527	17.5648	16.3594	12.4397	13.4696	15.9636	13.0793	11.2662	0.231204	5.04959	2.72257	0.127802	0.960773
Fis1	156.284	123.332	167.17	127.453	133.806	113.207	127.368	131.71	0.208086	6.97159	2.71954	0.127993	0.960773
CG1628	2.19406	1.40126	2.02539	1.79291	1.62241	1.49437	1.55009	1.47588	0.295732	1.80659	2.71932	0.128006	0.960773
ssp2	15.2767	17.784	10.0381	13.0867	17.4272	18.9517	16.5958	15.4619	-0.262002	6.12952	2.71763	0.128113	0.960773
Hs2st	3.17597	3.47721	3.50929	3.17864	3.98532	3.50085	3.8802	4.36526	-0.213893	2.59977	2.7166	0.128177	0.960773
CG17765	46.0093	47.4926	63.1445	48.8092	44.7396	36.449	48.7619	48.1988	0.230173	5.57037	2.71647	0.128185	0.960773
RpL14	312.023	262.044	300.531	320.881	305.668	243.784	253.808	269.236	0.182434	7.45646	2.71634	0.128194	0.960773
Nlg1	0.190599	0.222202	0.195496	0.115873	0.108632	0.158932	0.139644	0.122105	0.471609	0.00167485	2.71546	0.128249	0.960773
waw	23.3498	22.6931	17.0601	19.6474	25.2924	25.5764	22.4406	22.9597	-0.194401	6.92982	2.71308	0.128399	0.960773
mRpL20	34.228	25.1565	28.4028	29.4263	26.1096	23.2247	29.1079	24.3642	0.21461	4.0558	2.71093	0.128535	0.960773
isopeptidase-T-3	1.75304	2.488	0.95523	1.42907	2.31621	2.17117	1.93805	2.50351	-0.404625	2.36201	2.70974	0.12861	0.960773
CG12179	2.00731	3.45865	2.60577	2.82669	2.75757	3.83791	3.29625	3.51902	-0.278476	3.83799	2.70463	0.128934	0.960773
disco	2.17407	2.58221	3.39009	2.51351	1.80844	2.92248	2.01106	1.93862	0.31716	2.98454	2.70456	0.128938	0.960773
Pcl	5.43993	7.33238	3.7663	5.54881	6.8256	8.06894	6.51822	6.057	-0.292363	4.76478	2.70343	0.12901	0.960773
mRpL3	17.7026	16.0581	22.7886	18.4252	14.9833	15.9008	16.7722	17.9703	0.215931	4.4546	2.70306	0.129033	0.960773
Hacl	70.8888	58.3747	71.7752	65.6103	62.3026	65.022	58.9261	52.5658	0.184401	6.97176	2.70275	0.129053	0.960773
Cpr73D	1.59516	1.73305	1.0051	1.37808	2.08476	1.84386	1.83874	1.45221	-0.311666	2.31018	2.70056	0.129192	0.960773
12920208..12925352	0.494433	0.524413	0.456422	0.528758	0.858857	0.392883	0.815067	0.611731	-0.390705	1.6184	2.69721	0.129405	0.960773
CG42235	0.114067	0.0208144	0.17111	0.230734	0.205677	0.127567	0.204157	0.562687	-1.01491	0.823372	2.71535	0.129434	0.960773
CG15544	5.23548	4.2253	3.37368	5.60665	4.51647	3.43514	3.66504	3.95663	0.269813	4.16726	2.69613	0.129474	0.960773
3073087..3078231	1.08775	1.0883	0.89145	1.26041	1.57937	0.987665	1.44966	1.34818	-0.283443	2.65317	2.69612	0.129475	0.960773
tamo	15.8955	20.3616	10.5988	15.3752	20.5112	18.3853	19.6293	17.7433	-0.270952	6.25234	2.69609	0.129476	0.960773
CG4239	2.71621	2.81555	2.98657	2.65968	3.05054	3.36496	3.53658	3.11581	-0.202131	2.77333	2.696	0.129482	0.960773
CG7009	6.43316	6.31665	9.61488	7.37499	5.25703	6.38309	7.04115	6.18202	0.280487	2.83741	2.69164	0.12976	0.960773
Itpr	5.74344	7.75353	4.11991	6.20356	7.75071	7.76126	7.01076	6.62247	-0.26883	6.09488	2.69055	0.129831	0.960773
CG15611	24.9469	26.6368	31.2477	30.4463	24.6828	26.3351	24.7088	26.127	0.177056	5.56651	2.6891	0.129923	0.960773
CG44008	8302.29	6556.37	8434.98	7347.12	7359.18	6025.11	6611.75	6987.29	0.209405	12.7326	2.68909	0.129924	0.960773
CG16779	0.0786644	0.104184	0.0849151	0.0934028	0.0922994	0.0672128	0.06454	0.0414545	0.467421	0.0591261	2.68889	0.129937	0.960773
cdm	6.38376	7.25493	4.80148	6.1621	7.95447	6.86087	6.76008	7.38464	-0.211263	4.62928	2.68858	0.129957	0.960773
RpL8	816.533	613.751	667.464	748.545	718.102	584.233	576.526	629.997	0.208221	9.61808	2.68779	0.130007	0.960773
CG1965	21.0412	22.3521	14.3563	18.1391	23.4827	25.1525	21.2311	20.6836	-0.231544	6.06935	2.68482	0.130198	0.960773
ZIPIC	19.6521	23.8534	19.4821	18.464	21.4923	25.8887	24.7564	22.2197	-0.18983	5.16525	2.6801	0.130501	0.960773
RpL24-like	164.709	126.256	197.178	163.404	152.157	129.587	145.545	140.688	0.224254	6.88298	2.68008	0.130502	0.960773
vib	30.5687	39.2136	49.6973	39.885	30.6536	33.534	35.3503	37.7829	0.237694	7.05016	2.67915	0.130562	0.960773
l(2)k05819	10.2196	14.2847	6.96632	11.3665	13.4489	14.9846	11.8993	13.1757	-0.29941	5.98052	2.67679	0.130715	0.960773
Pp2B-14D	62.4047	60.9787	40.7289	50.4195	69.8386	68.8223	59.0739	58.7213	-0.233651	8.30851	2.67624	0.13075	0.960773
660	74.1958	91.8709	178.492	134.112	57.1506	88.0262	106.398	101.219	0.460818	3.32863	2.68284	0.130772	0.960773
MED14	4.15863	5.45716	4.39267	4.80839	5.62145	5.09247	5.34092	5.5316	-0.174973	4.80106	2.67589	0.130772	0.960773
CG33012	0.9487	0.947035	0.463642	0.499648	0.916031	0.926301	1.06189	1.01892	-0.428183	1.31145	2.67558	0.130793	0.960773
CR41548	2.67774	1.96321	0.735681	2.0296	1.17437	0.633266	1.86179	1.1947	0.635613	1.64471	2.67981	0.130859	0.960773
aru	5.7689	5.49078	4.62246	4.16879	6.5339	5.88389	5.2256	5.99606	-0.212735	4.23749	2.67424	0.130879	0.960773
CG1309	8.39856	8.13081	10.9741	9.12072	8.85388	7.41513	7.95973	8.05425	0.206705	4.00695	2.67404	0.130892	0.960773
POLDIP2	6.6444	5.35204	9.02516	6.74213	5.9136	5.33002	6.33052	5.91069	0.265852	3.43243	2.67252	0.13099	0.960773
641	22.0141	39.1559	10.7767	19.4666	33.3895	41.0324	29.1159	29.2747	-0.512647	2.02674	2.669	0.131218	0.960773
mRRF2	2.29419	2.78308	2.30712	2.60104	2.72539	2.71582	3.04246	3.32541	-0.218552	2.76951	2.66778	0.131298	0.960773
CG31142	36.3408	33.7421	56.4625	39.738	33.9853	29.1647	40.698	35.2068	0.282541	4.62426	2.66672	0.131366	0.960773
bbx	21.4738	20.8827	15.7155	18.0845	23.2255	23.5005	20.632	21.104	-0.192196	6.93184	2.66488	0.131486	0.960773
CR45807	96.5497	89.3422	100.822	108.364	96.0635	92.287	88.034	81.7851	0.16648	7.10329	2.66297	0.13161	0.960773
CR43875	13.5083	14.4332	20.8749	13.5175	12.6356	11.6451	13.7757	14.5509	0.267989	3.52724	2.66292	0.131613	0.960773
Nxf3	9.26178	10.8524	6.05673	7.89989	10.5882	11.5035	10.0683	9.35172	-0.262455	6.14859	2.65461	0.132156	0.960773
Vinc	25.8315	32.3018	17.8563	25.8825	35.1158	29.5667	29.8395	29.0263	-0.255317	6.79043	2.65457	0.132158	0.960773
CG42495	1.11829	3.68193	3.08573	3.04724	2.04059	1.67418	1.78623	2.14926	0.536078	0.656945	2.652	0.132326	0.960773
CG3726	8.47414	8.85451	7.55494	9.18287	10.3309	9.75314	9.49358	9.19032	-0.162333	4.84496	2.64998	0.132459	0.960773
CG9547	59.9333	65.3321	59.8888	65.9227	60.1362	76.4507	83.0431	71.2922	-0.190122	6.60976	2.64975	0.132474	0.960773
CG4377	117.548	110.083	144.068	138.175	126.341	104.782	106.13	116.411	0.193946	6.5702	2.64931	0.132503	0.960773
hyx	15.5977	16.1502	14.7568	14.2152	17.49	15.7305	17.3753	18.3908	-0.160287	5.33029	2.64909	0.132518	0.960773
CG14606	10.7866	10.7758	12.4277	12.0617	10.8304	11.2153	7.29782	10.4925	0.233383	4.37418	2.64897	0.132525	0.960773
CG5727	23.6427	16.3849	24.7149	21.2254	20.9747	18.4741	17.5377	17.1783	0.239005	3.9565	2.6486	0.13255	0.960773
CG3756	4.57806	3.77431	5.05988	4.0879	4.47548	2.67843	2.98758	4.13432	0.319445	2.21317	2.64522	0.132772	0.960773
CG14694	1.69559	1.22914	1.50092	1.50194	1.60305	0.902331	1.22528	0.758899	0.426901	0.879891	2.63301	0.133578	0.960773
Wdfy2	15.0211	17.7101	21.7818	17.8863	14.7571	14.4081	16.4512	17.7728	0.214875	4.82549	2.63244	0.133616	0.960773
RhoGAP15B	14.032	20.7392	10.1349	17.4229	21.926	19.2614	18.6629	17.9571	-0.297912	6.72453	2.63172	0.133664	0.960773
id-Dmel_CG9527	0.157205	0.247742	0.0824541	0.0995203	0.253247	0.145106	0.22886	0.302135	-0.621491	-0.136534	2.63103	0.13371	0.960773
MP1	2.98173	2.66338	3.8256	3.7545	3.07261	2.20916	2.61236	3.08574	0.292871	2.22401	2.63047	0.133747	0.960773
CR45165	4.93073	5.04953	2.32228	5.00526	7.41413	6.39679	5.02389	5.31844	-0.449706	0.769635	2.62824	0.133895	0.960773
CG15916	22.2156	21.3581	22.0382	19.5935	21.8945	17.8578	17.6786	19.3091	0.175964	4.28369	2.6281	0.133904	0.960773
Art8	5.93917	3.66844	5.97384	5.04563	4.87739	3.0163	4.28264	4.52039	0.331178	2.51225	2.62781	0.133924	0.960773
Amy-p	2159.74	1746.1	2046.24	1942.26	1982.74	1806.13	1309.27	1739.71	0.233337	11.586	2.62778	0.133926	0.960773
CR46485	53.9443	39.1485	35.6166	38.9542	43.3355	37.2025	29.7167	32.7493	0.256016	7.75599	2.62463	0.134135	0.960773
Crtc	11.0709	14.523	6.53522	9.79213	13.9894	15.2227	12.6714	11.4954	-0.326692	6.14768	2.62349	0.134212	0.960773
LpR1	11.6261	10.7997	6.50596	8.9448	9.28832	8.831	5.53228	7.0707	0.326785	5.83287	2.62176	0.134327	0.960773
CG33158	6.38555	6.96589	5.72379	6.55497	7.34508	7.31285	6.59924	8.12833	-0.173752	4.56549	2.61789	0.134586	0.960773
Fpps	14.5642	17.5457	26.1729	20.7721	12.976	16.7491	16.173	19.2727	0.300829	4.72803	2.61752	0.134611	0.960773
CG6136	11.6559	9.142	6.4721	7.38157	14.7397	10.1105	10.2643	9.08143	-0.323584	4.4255	2.61071	0.135068	0.960773
Ahcy	32.8186	28.1219	33.0211	32.5439	31.392	26.9619	27.1266	29.1004	0.168244	5.99895	2.60826	0.135233	0.960773
p47	14.8332	11.2239	14.1183	13.0112	12.7366	10.2928	11.0862	12.7605	0.207828	4.16863	2.60733	0.135295	0.960773
Cyp28d1	48.0218	27.6303	25.5052	28.3271	35.3054	26.4427	10.9664	17.2532	0.554962	5.47497	2.65806	0.135418	0.960773
Cyp6a19	3.05848	2.38101	1.55361	3.65444	2.03084	0.953927	2.81844	1.70914	0.53106	2.13977	2.60477	0.13552	0.960773
NetB	0.860358	0.866662	0.92988	0.921733	0.893181	0.88679	0.645428	0.654682	0.240565	2.7782	2.60283	0.135599	0.960773
Mlc1	124.247	144.321	223.967	160.224	115.438	153.875	140.363	134.999	0.284618	7.72792	2.60254	0.135619	0.960773
dnc	4.8718	6.08653	7.19194	7.48595	5.26184	6.31738	5.78319	4.64131	0.243744	6.63619	2.60115	0.135712	0.960773
tw	1.44435	0.786589	1.1757	1.10271	0.939819	0.672213	1.04416	0.903794	0.366726	1.54764	2.60065	0.135746	0.960773
Idi	5.77913	5.46189	8.79175	6.31634	4.68897	5.23971	5.68804	6.30063	0.288047	2.90023	2.59525	0.136112	0.960773
Pi4KIIalpha	14.4199	17.4042	12.2089	14.0315	17.0823	17.5628	15.2357	17.4999	-0.191995	5.94698	2.59242	0.136304	0.960773
CG12895	11.823	9.30815	12.6524	9.58008	11.7826	8.41823	8.48764	7.69647	0.27904	2.74591	2.59005	0.136466	0.960773
Jon99Fii	4037.78	4011.87	5048.2	4743.5	3859.05	4160.7	3700.71	4125.04	0.195431	11.9098	2.5887	0.136558	0.960773
Pex6	2.89662	4.06736	5.26835	4.6384	3.11328	3.64126	3.32707	3.95283	0.287339	3.52008	2.5884	0.136579	0.960773
Fdx2	51.2161	51.7036	72.874	60.2608	51.5123	52.7663	47.3776	55.3776	0.213542	5.58188	2.58722	0.136659	0.960773
CG9164	0.786815	0.779756	1.08793	0.49933	0.556692	0.862366	0.46004	0.469303	0.444764	1.71497	2.58483	0.136823	0.960773
CG5770	292.753	416.368	466.433	292.416	380.418	475.852	493.315	448.38	-0.27051	8.53653	2.58207	0.137011	0.960773
InR	7.90829	13.4914	8.24095	11.9108	11.8162	13.2236	14.1033	11.7313	-0.271399	7.03547	2.58152	0.137049	0.960773
Xbp1	663.62	649.3	408.786	525.655	722.957	665.328	674.029	643.22	-0.244076	10.3714	2.57988	0.137162	0.960773
CG34126	5.82845	8.62167	5.14195	7.19456	8.20493	8.08982	7.63343	8.11305	-0.236471	5.4858	2.57856	0.137252	0.960773
23667509..23672703	0.624334	0.686903	0.536785	0.444509	0.479528	0.459357	0.438207	0.517613	0.299012	1.47539	2.57808	0.137285	0.960773
CR44431	24.6352	23.2706	37.8508	29.369	20.4162	23.6419	29.4492	22.1296	0.290589	3.65358	2.57533	0.137474	0.960773
Bsg25D	13.3343	20.0383	11.6232	16.0306	15.7952	20.7004	18.6266	19.0078	-0.260265	6.38623	2.57388	0.137573	0.960773
Trs31	24.6364	22.3034	33.7721	26.5985	25.1145	21.7516	25.2313	20.6924	0.234624	4.06406	2.56833	0.137956	0.960773
id-Dmel_CG17839	0.140957	0.128605	0.650603	0.296948	0.146929	0.164715	0.148402	0.254972	0.781258	0.921279	2.57277	0.137988	0.960773
CG13868	44.6409	41.2096	37.9357	45.8989	35.3806	38.2515	40.2457	39.9571	0.165041	7.28975	2.56591	0.138123	0.960773
Su(dx)	191.883	212.371	111.086	152.839	217.164	219.865	199.831	190.003	-0.284895	9.80632	2.56471	0.138207	0.960773
Alg1	29.2977	28.4191	35.9423	34.5909	29.528	27.1187	30.2134	28.3053	0.179887	5.62142	2.56329	0.138305	0.960773
Amy-d	1810.74	1402.4	1582.6	1518.08	1531.24	1467.74	1079.71	1419.29	0.225438	11.2128	2.56306	0.138321	0.960773
CG33468	6.07676	4.01482	5.07765	4.48181	6.74234	4.07015	7.10599	7.95384	-0.370557	1.81283	2.56292	0.138331	0.960773
CG9004	8.12568	12.3633	9.21367	10.9455	9.33063	14.0789	12.3001	13.8341	-0.265107	4.93427	2.56244	0.138364	0.960773
CG16758	15.2503	14.5425	15.4532	16.0318	14.7162	16.2084	19.6472	21.8131	-0.217323	5.05427	2.5614	0.138436	0.960773
CR45209	1.06305	1.08901	0.75321	1.11319	0.887086	0.922105	0.650022	0.698954	0.372219	0.671261	2.55966	0.138557	0.960773
RpS23	1078.12	958.029	1214.78	1090.23	1051.01	909.948	949.585	990.889	0.179542	9.80076	2.55692	0.138748	0.960773
CG3420	78.5838	60.3366	76.8225	66.1865	63.2119	54.7753	66.0239	66.1993	0.197589	5.57491	2.55587	0.138821	0.960773
pie	0.487095	0.722172	0.526933	0.87828	0.653039	0.967633	0.83165	1.14094	-0.43402	0.753933	2.54918	0.139288	0.960773
CG10147	4.91874	5.25329	4.40706	6.18849	5.63986	6.48862	6.70484	5.65816	-0.214481	3.64312	2.54733	0.139417	0.960773
CG31689	5.71231	7.11894	6.08015	7.19678	5.2557	7.2292	5.25393	4.8043	0.234068	4.33233	2.54393	0.139655	0.960773
RIOK2	22.7	19.2363	28.4149	22.9255	20.4259	21.1964	21.1438	19.5801	0.204721	5.26816	2.54361	0.139677	0.960773
158	14.3801	19.4028	39.964	36.8719	14.356	18.5973	25.5656	19.8522	0.516652	1.91213	2.5435	0.139685	0.960773
CG5506	428.915	381.719	627.207	502.543	415.191	389.225	398.734	462.605	0.245508	8.22111	2.54253	0.139753	0.960773
id-Dmel_CG31000	0.0878964	0.148051	0.0468111	0.073988	0.132423	0.0835737	0.152858	0.181925	-0.588512	0.180904	2.53885	0.140012	0.960773
CR45600	12.5054	19.4541	15.7522	16.0012	16.1513	20.3672	18.4307	20.6998	-0.226798	5.66628	2.53828	0.140052	0.960773
RpL34a	47.2108	49.6145	69.9572	60.5158	46.2756	49.097	51.804	51.3709	0.218799	5.05066	2.53634	0.140189	0.960773
Cip4	47.2525	53.1023	31.1864	42.6067	54.4029	53.4149	51.0707	48.835	-0.231535	7.55085	2.53361	0.140382	0.960773
CG17019	28.7127	39.3812	24.7175	29.1048	36.8196	36.1984	35.244	34.8977	-0.209685	6.56779	2.53124	0.140549	0.960773
sug	126.485	123.559	114.651	137.58	108.382	120.193	117.547	112.314	0.155293	7.56181	2.53093	0.140571	0.960773
CG10514	0.655633	0.705001	0.702499	1.1647	0.895373	0.868293	1.0808	1.84511	-0.51255	0.492244	2.53011	0.140629	0.960773
CG8519	0.425469	0.939821	1.26614	1.11385	0.396812	0.869923	0.611731	0.645567	0.582157	0.225432	2.52876	0.140725	0.960773
Gas41	14.5363	10.8449	12.4054	11.2223	11.4389	10.4278	11.197	10.0401	0.210537	3.28367	2.52719	0.140836	0.960773
RasGAP1	8.25676	10.9449	5.85426	8.07422	8.83583	10.2555	10.2584	11.0835	-0.266313	5.64323	2.52622	0.140905	0.960773
cep290	0.246842	0.351331	0.324709	0.299585	0.303886	0.374854	0.478999	0.407994	-0.334584	1.2062	2.52535	0.140967	0.960773
Hip1	18.5194	32.5804	21.7631	27.9777	24.691	35.6142	32.327	31.647	-0.281859	7.0055	2.52345	0.141102	0.960773
Lmx1a	0.938426	0.933034	0.694137	0.706153	0.650805	0.637339	0.566662	0.786176	0.333762	1.01103	2.51884	0.14143	0.960773
Ass	51.6284	33.2959	26.3598	39.1288	39.6167	31.9312	24.502	25.1212	0.339387	5.63026	2.51588	0.141641	0.960773
Rcc1	13.768	12.9419	14.6613	14.3386	15.0352	11.2062	12.5008	11.0211	0.188647	4.96555	2.51571	0.141653	0.960773
Or-CD15	33.4373	25.4228	56.3621	37.8294	26.2934	24.3122	36.1298	30.8718	0.401511	1.73804	2.51535	0.141679	0.960773
Sur-8	24.0406	23.9111	12.4005	15.9011	26.8182	24.2483	22.7293	22.149	-0.307623	6.65345	2.51415	0.141765	0.960773
Spn42Dd	1.30386	1.77227	2.33356	2.11771	1.31531	1.38612	1.67941	1.5598	0.361985	1.04846	2.51251	0.141882	0.960773
CG18731	21.9227	15.8504	24.7	20.4716	20.8319	14.0602	16.852	18.4832	0.266337	3.5656	2.51214	0.141909	0.960773
RpS18	405.791	289.076	350.673	316.694	353.843	277.996	284.854	283.699	0.209349	7.6166	2.50926	0.142115	0.960773
CG11825	4.72909	3.28097	2.70004	3.65093	3.0093	3.30548	2.90024	2.65094	0.300797	2.10385	2.50783	0.142218	0.960773
CG9899	1.54309	1.20397	1.54726	1.15396	1.1811	1.1275	1.12276	1.1965	0.259256	1.93482	2.50722	0.142261	0.960773
Cyp12d1-p	5.65443	2.14903	2.40684	5.45571	3.44074	3.41382	2.01162	1.95667	0.562116	3.90058	2.54765	0.142354	0.960773
Dhfr	50.6273	37.2071	56.1467	48.3578	46.2767	35.7932	44.0709	41.2656	0.226481	4.89988	2.5056	0.142378	0.960773
CG3520	1.01212	1.27245	0.993169	1.25264	1.07031	0.8725	1.05852	0.873052	0.250158	2.0884	2.50548	0.142387	0.960773
CG4452	20.1938	19.3931	21.3107	21.5793	19.4527	19.5536	15.8253	19.6606	0.171227	5.04358	2.50414	0.142483	0.960773
msl-2	4.45986	4.30309	2.998	3.45718	5.0778	4.74123	4.0063	4.34141	-0.23057	4.00788	2.5034	0.142536	0.960773
CG6040	1.04272	1.14251	0.584734	0.698006	1.42239	1.14003	0.931751	1.01606	-0.352315	2.71502	2.50263	0.142591	0.960773
CG42797	4.34609	5.24115	2.8318	4.07804	5.27663	5.25343	4.74834	4.7122	-0.254021	4.98906	2.50233	0.142613	0.960773
Nup205	4.72795	5.07596	4.00948	4.91366	6.14215	4.74711	5.47223	5.24236	-0.181592	5.02885	2.49953	0.142816	0.960773
RpL7A	411.249	413.513	472.895	485.42	434.203	389.93	384.524	407.951	0.166146	9.12701	2.49907	0.142848	0.960773
P5cr-2	129.974	85.6569	120.462	107.035	111.294	90.4503	96.2356	88.4296	0.224783	7.23632	2.49873	0.142873	0.960773
CG14270	14.7077	11.9196	13.8425	15.2853	15.0198	10.6641	10.9908	11.7648	0.229142	3.3424	2.49633	0.143047	0.960773
GstD6	2.81292	0.55792	0.517453	1.82499	0.98855	0.21596	1.26727	0.43093	1.01032	-0.1531	2.49748	0.143301	0.960773
TrissinR	0.848068	0.598265	0.847439	0.834971	0.55448	0.632976	0.741225	0.638526	0.308158	1.40547	2.49237	0.143334	0.960773
Tre1	9.79205	10.9071	6.30832	7.46944	12.65	11.3643	9.4848	9.11052	-0.280781	4.14975	2.49181	0.143374	0.960773
SpdS	2.7229	2.79058	2.45331	3.19115	2.66126	2.35466	2.23116	2.43738	0.229029	2.17115	2.49144	0.143401	0.960773
smash	118.965	143.337	59.6347	101.704	154.537	150.343	122.847	121.432	-0.352201	10.3143	2.49105	0.143429	0.960773
sni	13.5968	10.6426	11.0847	13.6341	12.3611	9.31044	10.4949	11.0185	0.207003	4.34723	2.49074	0.143452	0.960773
CG32572	1.13766	0.961082	0.583443	0.852309	1.34921	1.26485	1.05844	0.971772	-0.365441	1.25132	2.48886	0.143588	0.960773
Jon25Bii	605.197	329.126	313.401	357.201	366.991	398.574	238.491	252.863	0.38008	8.32381	2.49809	0.143615	0.960773
scb	100.809	144.201	84.691	112.24	132.453	131.969	135.049	126.996	-0.231087	9.2405	2.48763	0.143678	0.960773
CR44221	0.576054	1.94464	0.731183	1.37536	1.77294	2.13613	0.976752	2.71247	-0.679321	-0.133848	2.48452	0.143904	0.960773
RpL37a	167.284	152.805	242.972	221.042	176.291	146.569	173.898	176.551	0.245352	7.88516	2.4843	0.14392	0.960773
Las	8.52275	9.06489	13.2017	10.8746	8.85591	9.77404	8.94467	8.32356	0.238181	3.74179	2.48011	0.144227	0.960773
CG12822	20.0985	18.4708	26.157	20.5138	19.797	17.7266	19.2082	18.9725	0.196045	4.94015	2.47863	0.144335	0.960773
CG14695	28.664	25.2164	30.4452	22.9596	40.6315	22.8422	33.4161	34.4175	-0.265076	5.05778	2.47854	0.144341	0.960773
tinc	2.896	4.72843	2.4126	3.30582	4.35222	4.59534	3.71698	3.83884	-0.284813	4.73802	2.47795	0.144384	0.960773
CG3857	1.76581	1.85894	1.22255	1.62152	2.0776	1.94281	1.81693	2.03625	-0.257735	2.09084	2.47727	0.144434	0.960773
Smg5	24.4851	33.7086	18.4108	25.4258	30.9659	33.8043	28.931	29.2856	-0.248008	7.16173	2.47693	0.144459	0.960773
CG11470	9.91113	14.2422	16.8212	24.6904	8.97398	12.3602	14.3155	14.6435	0.405976	3.48952	2.47357	0.144757	0.960773
CR45650	2.85638	2.37614	2.1327	2.00581	3.52587	2.03978	4.55043	2.66414	-0.419716	1.10955	2.47196	0.144823	0.960773
DCTN1-p150	35.5581	41.9301	31.3536	35.1233	43.8395	42.7539	39.1439	38.6964	-0.168597	7.45352	2.47145	0.144861	0.960773
RpL12	454.626	560.703	812.122	750.7	501.231	535.197	578.829	554.26	0.272713	9.42129	2.47075	0.144912	0.960773
RFeSP	166.187	157.204	210.766	203.041	163.509	145.949	172.89	172.572	0.195514	7.60565	2.47005	0.144964	0.960773
alpha-Est2	1.03964	0.731733	1.21679	1.4775	1.49598	1.12771	1.73483	1.5414	-0.377414	1.50253	2.46932	0.145018	0.960773
Syx1A	60.9465	77.1978	33.0793	50.5038	77.3249	76.8686	65.5831	63.1977	-0.330015	8.03467	2.46756	0.145147	0.960773
CG1801	2.69232	2.62053	5.47302	3.80577	2.4998	2.48824	3.38342	3.15191	0.36401	4.12023	2.46683	0.145201	0.960773
lic	25.067	28.2386	18.9761	25.245	26.3732	32.2047	26.9292	28.9436	-0.208515	5.69276	2.46306	0.145479	0.960773
CG8461	20.1665	13.6024	23.6026	17.0526	17.8006	14.0533	15.6044	15.5726	0.265803	3.93013	2.46274	0.145503	0.960773
CR43215	10.4923	10.0369	6.11535	7.8018	10.1102	9.57095	11.5982	10.9058	-0.267735	3.51576	2.46132	0.145608	0.960773
CG6650	32.1231	31.7167	26.7107	27.2094	38.3584	34.6543	30.4797	31.6691	-0.174209	6.62924	2.46071	0.145654	0.960773
Dgp-1	21.9449	19.5236	12.0865	16.4719	23.7732	20.5195	20.561	20.3575	-0.25841	5.84834	2.45909	0.145773	0.960773
GAPcenA	18.4775	20.3276	20.0308	18.5794	21.5905	22.1175	21.5435	21.3325	-0.137911	6.71327	2.45829	0.145832	0.960773
CG8314	9.58914	10.2901	13.6162	13.197	10.4725	10.3964	10.437	9.54901	0.21643	3.81482	2.45802	0.145852	0.960773
RpL21	1772.34	1296.67	1567.02	1461.64	1526.55	1256.67	1304.09	1322.41	0.199149	9.98524	2.45688	0.145937	0.960773
CG10623	52.1675	40.8184	36.0327	42.9112	39.2841	45.2126	31.9159	31.8145	0.239029	6.11173	2.45451	0.146113	0.960773
RpLP0-like	98.4134	71.7646	119.327	94.9998	87.2177	72.7042	90.2719	81.6138	0.238983	6.41022	2.45432	0.146127	0.960773
CR45124	1.38515	2.08798	0.833911	2.03699	1.23569	3.50935	1.92884	3.29875	-0.622575	0.197437	2.45419	0.146137	0.960773
rau	5.60815	6.77967	6.90808	6.06722	5.71424	9.02404	8.09596	7.51795	-0.237658	3.98697	2.45392	0.146157	0.960773
RpS27A	769.119	573.915	713.822	644.42	697.078	550.067	611.522	531.493	0.203294	8.55882	2.45288	0.146235	0.960773
Prosbeta1	88.3408	73.5512	103.444	91.4097	83.1218	71.9664	81.4235	81.4849	0.191383	6.16957	2.45245	0.146266	0.960773
LUBEL	0.3126	0.446924	0.658204	0.644399	0.189354	0.404036	0.46447	0.436659	0.483111	2.1528	2.45134	0.146349	0.960773
Mdr49	15.089	10.335	7.4703	14.068	12.0893	9.87982	7.56338	8.09103	0.34683	5.54154	2.44941	0.146545	0.960773
Pdss2	4.82566	4.51944	4.27767	5.34109	4.94772	3.61163	3.97376	4.13055	0.212172	3.15764	2.44786	0.146609	0.960773
CG32483	96.2229	77.9878	99.0846	86.568	90.2356	79.3286	76.2715	78.78	0.174639	6.88735	2.44725	0.146654	0.960773
CG10000	29.4596	38.6192	36.6497	33.4603	34.4755	39.1988	46.3435	40.4757	-0.193855	6.59944	2.44724	0.146655	0.960773
r	5.5243	7.32421	5.60216	6.51664	8.23191	6.74094	7.04497	6.84377	-0.185545	5.58333	2.44651	0.146709	0.960773
Pex10	20.2935	19.1591	21.2947	19.3373	17.032	19.2389	18.5121	18.3916	0.15389	4.83628	2.44561	0.146776	0.960773
CG18581	1.87898	1.05498	2.66852	1.91717	2.51631	1.3612	2.81384	5.1854	-0.638231	0.728615	2.44537	0.146794	0.960773
Psi	16.6604	16.5594	9.23212	13.7318	17.8517	17.0707	16.3408	17.0688	-0.25899	6.48138	2.44473	0.146842	0.960773
CG11158	6.84215	6.51324	7.18782	6.88534	6.03089	5.79654	6.48252	6.44202	0.172068	3.39957	2.44462	0.14685	0.960773
PIG-O	1.91108	2.46205	1.85809	1.97158	2.459	2.21849	2.53365	2.38061	-0.20187	3.00917	2.44459	0.146853	0.960773
CG10600	95.845	122.436	67.4663	97.5164	114.42	129.208	111.352	107.817	-0.25046	9.12739	2.44137	0.147094	0.960773
Frl	3.12566	4.75766	4.01738	4.49484	4.55551	4.27611	5.42228	5.1498	-0.220878	4.78779	2.4403	0.147174	0.960773
CR45144	11.4291	23.7126	11.5203	15.0178	16.8503	25.9243	17.2713	20.4484	-0.364526	4.40238	2.44115	0.147192	0.960773
CR46099	209.658	272.074	253.538	254.595	230.473	306.231	323.434	297.509	-0.204365	6.93256	2.43529	0.14755	0.960773
CG14696	22.0767	24.7714	25.1392	23.4263	27.2002	24.621	29.5706	26.7605	-0.157075	5.38608	2.43501	0.147571	0.960773
Ccdc58	24.9041	19.1881	20.3572	20.0935	20.1744	16.9269	19.9935	18.6281	0.184525	5.04343	2.43351	0.147685	0.960773
gwl	0.574604	0.60851	0.497279	0.428718	0.612461	0.534499	0.860239	0.739517	-0.355221	0.958862	2.43339	0.147694	0.960773
Tsp42Ej	1.31068	0.883874	1.11786	0.935392	1.80703	1.05658	1.18097	1.72498	-0.414785	0.544022	2.43266	0.147748	0.960773
l(3)psg2	2.12887	4.46032	2.52321	3.51693	3.30166	4.94137	3.76123	4.16558	-0.336873	4.57287	2.43124	0.147856	0.960773
CG2767	101.565	101.021	82.7184	86.7075	120.099	107.238	99.6322	99.0004	-0.170891	7.02803	2.43099	0.147874	0.960773
CG10359	3.82589	4.4127	6.87196	4.88322	3.33257	4.23831	4.91296	3.90198	0.308581	3.01351	2.43078	0.14789	0.960773
CR45520	2.42442	1.80451	2.57669	1.90409	2.04692	1.78002	2.05541	1.33655	0.295439	2.32814	2.42922	0.148008	0.960773
Incenp	5.93835	6.44027	6.46443	6.44257	6.69832	7.27096	8.6336	6.54635	-0.181872	4.27541	2.42885	0.148036	0.960773
CG5380	4.55495	3.84019	3.95862	4.61736	3.79109	4.22522	3.15017	3.40752	0.24372	2.14159	2.42877	0.148042	0.960773
Hpr1	5.9441	6.35223	8.25612	7.00832	5.69775	5.1023	7.05099	6.10872	0.225591	3.90204	2.42843	0.148068	0.960773
CG7191	51.3068	42.6437	39.7963	45.4571	45.3963	39.0621	33.6	41.5112	0.192835	6.12245	2.42703	0.148174	0.960773
CG43861	0.343115	0.180003	1.16797	0.418136	0.136002	0.318085	0.161606	0.511066	0.914229	0.622913	2.43323	0.148474	0.960773
mrj	45.9264	54.395	37.9874	47.4691	57.4538	55.15	52.8976	48.718	-0.182366	7.35905	2.42229	0.148533	0.960773
RpLP2	2886.27	1868.48	2558.97	2494.84	2462.62	1880.64	2115.9	2036.13	0.234687	10.4341	2.42083	0.148644	0.960773
RluA-1	23.3306	15.0985	14.6334	21.7793	21.9534	13.9192	10.7691	13.1012	0.35376	5.75606	2.42162	0.148666	0.960773
jv	0.321144	0.396682	0.74684	0.334223	0.202748	0.431853	0.269937	0.370328	0.512039	1.33704	2.42048	0.148671	0.960773
CG17264	35.3035	34.9409	30.0602	29.2557	39.2413	37.7211	32.5803	38.453	-0.167858	6.59894	2.42028	0.148686	0.960773
CG42675	0.475119	0.274894	0.53487	0.426542	0.335041	0.644574	0.775042	0.690424	-0.495532	0.572872	2.41812	0.14885	0.960773
RpL3	229.457	261.484	283.537	297.857	245.002	237.27	237.562	249.796	0.169017	9.15414	2.41764	0.148887	0.960773
crq	12.717	19.854	16.6712	16.1609	16.0882	21.6476	19.6992	20.2675	-0.227769	5.67157	2.41689	0.148943	0.960773
CG4538	95.7864	89.6431	45.8053	70.7869	107.921	113.005	82.6966	82.2133	-0.329535	8.47329	2.4159	0.149019	0.960773
CG12929	9.57986	7.31878	11.254	10.2191	7.85817	7.33715	8.53491	8.81767	0.261199	2.3059	2.41571	0.149033	0.960773
CG3397	5.08985	4.13059	5.25497	5.27665	7.27047	4.56481	7.57045	5.17432	-0.289423	2.72964	2.41159	0.149348	0.960773
CG14818	99.1899	76.6007	82.8531	77.6035	84.8559	67.6059	72.9518	75.0121	0.1885	5.6274	2.41158	0.149349	0.960773
dimm	0.945743	0.721995	0.668141	0.633625	1.09806	0.99689	0.799978	0.843906	-0.305945	1.49881	2.41107	0.149388	0.960773
ND6	3.14954	3.03934	4.96217	2.3499	1.80763	1.81818	3.36623	2.79377	0.483356	0.661209	2.41105	0.149389	0.960773
CR44957	1.88434	2.14903	1.92973	2.03859	1.27413	1.6013	2.06348	1.65233	0.302137	1.33563	2.41069	0.149417	0.960773
id-Dmel_CG16890	10.7336	9.05856	8.82468	5.20547	13.5144	9.8321	13.1443	8.76736	-0.393833	1.26559	2.41012	0.14946	0.960773
CR45896	6.62847	11.8308	5.67184	7.76083	10.1149	11.3905	8.70185	9.90279	-0.309423	4.44263	2.4092	0.149531	0.960773
Prosbeta7	30.0971	29.967	40.769	33.8983	32.2682	28.1441	27.0693	31.9401	0.198856	5.27353	2.40759	0.149654	0.960773
CG12237	21.666	18.1778	26.0931	22.2695	21.3018	16.4703	19.4994	20.4198	0.208799	5.12525	2.40719	0.149685	0.960773
Gal	53.1688	26.5499	19.1049	33.8321	31.9203	28.853	13.6037	18.8032	0.538345	6.05269	2.45759	0.149788	0.960773
CG3224	69.9486	53.1146	63.2949	58.4341	65.4464	52.4547	49.6296	49.1207	0.202816	5.61981	2.40579	0.149792	0.960773
Hrd3	49.347	49.6705	35.6457	39.2536	54.0403	52.3762	49.8472	46.1041	-0.194759	7.27561	2.40155	0.150118	0.960773
CG13893	71.3796	66.0092	73.1338	79.6876	71.3078	68.6287	64.7998	59.7095	0.159128	7.25285	2.39923	0.150296	0.960773
CR45591	21.7808	32.6174	35.8437	35.1988	18.5139	33.9169	22.5086	26.3177	0.328986	3.30346	2.39886	0.150325	0.960773
Sh3beta	113.504	120.481	108.833	112.816	132.482	122.086	135.342	121.882	-0.143832	8.58948	2.39754	0.150427	0.960773
CG11583	9.64351	11.0213	22.2847	14.9456	9.46736	10.5533	12.2875	13.0714	0.373946	4.02254	2.39635	0.150571	0.960773
CG12159	5.90321	7.94009	10.3932	8.7786	5.90292	7.09258	6.822	7.83658	0.277081	2.99759	2.39494	0.150628	0.960773
eIF6	16.2906	15.2477	22.8283	18.9021	17.8051	12.6815	16.4519	16.1754	0.240492	4.17545	2.39388	0.15071	0.960773
mbl	3.31802	5.05891	2.80526	4.33611	4.77051	4.86761	4.76275	4.36063	-0.252211	6.01431	2.39274	0.150798	0.960773
Fbxl4	5.70258	6.1352	4.6404	5.39973	6.84539	6.42208	5.89966	5.99733	-0.17763	4.09316	2.38474	0.151419	0.960773
Nrg	7.03055	10.6134	6.52606	7.97559	9.61143	9.79288	9.23406	9.28235	-0.21682	6.45021	2.38314	0.151543	0.960773
path	23.5277	34.8687	17.8924	23.5145	25.8972	33.8391	29.8694	33.2443	-0.279768	6.47371	2.38283	0.151567	0.960773
CR14033	7.44916	6.40106	6.7622	6.7331	6.65876	6.48581	4.47071	6.18672	0.225032	3.30999	2.38171	0.151654	0.960773
CG32040	2.77418	2.53109	2.07133	2.82937	1.80461	1.70836	2.30582	2.59867	0.302725	1.69508	2.38075	0.151729	0.960773
RpIIIC160	4.48196	4.57495	5.47061	5.18155	4.69673	4.54151	4.21521	4.41761	0.165412	4.38061	2.38028	0.151766	0.960773
mAcon1	60.8705	65.4754	77.2509	75.0104	64.2637	63.0891	62.0698	63.9104	0.161362	7.6899	2.37769	0.151968	0.960773
ctrip	17.4034	28.0806	14.3782	20.1622	25.2189	26.8401	22.5618	23.3456	-0.271122	8.04239	2.37643	0.152067	0.960773
CG31704	7.73302	6.43454	6.3533	7.01593	6.866	5.1343	5.41964	6.06381	0.255463	1.73925	2.37607	0.152095	0.960773
armi	2.26912	3.97327	2.18636	2.79698	2.83597	4.14174	3.3178	3.76638	-0.304306	3.72345	2.37603	0.152097	0.960773
CG46463	2.27732	3.98764	2.19427	2.8071	2.84622	4.15672	3.3298	3.78	-0.304306	3.72345	2.37603	0.152097	0.960773
Tap42	19.8649	18.1243	22.9222	17.9137	18.9935	15.1415	18.4434	17.8992	0.186534	4.64307	2.37576	0.152119	0.960773
Klp68D	8.54881	12.5028	7.0863	9.4963	11.9299	11.8461	10.7306	10.5491	-0.237301	4.95446	2.37555	0.152135	0.960773
HINT1	78.9349	62.2793	102.365	87.6718	72.6982	59.2778	75.0744	77.6635	0.244085	5.77384	2.37488	0.152187	0.960773
Dsp1	14.0475	14.0821	10.8868	12.79	15.4995	16.4405	13.0662	14.7377	-0.181937	6.08284	2.37439	0.152226	0.960773
CG15160	3.20201	3.52886	2.56076	2.28655	3.90295	3.62481	3.21039	3.12271	-0.235144	3.67903	2.37384	0.152269	0.960773
RpL22	55.8203	73.6638	111.577	95.2448	55.3768	72.7392	67.8044	79.3644	0.311361	6.3969	2.37187	0.152423	0.960773
Cat	35.0211	32.7675	34.0594	37.6805	31.8439	33.5827	30.8104	31.9061	0.146976	6.06136	2.37178	0.152431	0.960773
6269892..6287593	0.088019	0.147501	0.124366	0.139385	0.190986	0.115776	0.186132	0.155356	-0.351155	1.37793	2.37132	0.152467	0.960773
CG5543	8.58537	8.20863	5.19084	7.38548	8.95317	9.76063	8.53051	8.01004	-0.239118	4.13143	2.37117	0.152478	0.960773
CG3909	8.22367	7.58205	11.3206	8.43936	8.23493	7.49001	7.50202	7.70853	0.225251	3.2051	2.37094	0.152497	0.960773
CG1529	28.0659	25.7228	20.6407	24.2073	30.3691	27.2531	30.8488	25.4075	-0.182734	6.43008	2.36863	0.152678	0.960773
mRpL34	8.36283	5.50072	3.59066	5.61079	9.9762	6.18161	8.61055	6.72811	-0.418356	1.19822	2.36792	0.152734	0.960773
Khc	163.498	182.74	147.696	171.277	173.018	198.645	192.629	193.039	-0.16465	9.36816	2.36756	0.152762	0.960773
CG5412	17.8319	14.449	23.3822	16.0647	16.1076	14.8631	15.2705	15.8776	0.232346	4.09916	2.3675	0.152767	0.960773
mRpS29	17.9306	17.1049	22.0153	22.0554	16.9701	16.4939	19.2619	17.9309	0.187082	4.75682	2.36637	0.152856	0.960773
CG6178	43.9125	37.0161	47.3818	44.0313	37.5137	41.0216	40.8731	36.446	0.169818	6.36657	2.36571	0.152908	0.960773
id-Dmel_CG43946	0.241647	0.188977	0.248962	0.231808	0.16098	0.205732	0.166658	0.19904	0.336518	0.653561	2.36566	0.152912	0.960773
Glos	4.32661	4.65188	3.63766	4.04016	4.29022	5.11935	4.99229	4.74504	-0.178051	4.15	2.36521	0.152947	0.960773
btl	2.36403	2.1715	3.57859	2.35974	1.58447	2.27117	2.32504	2.43346	0.303793	3.25344	2.3634	0.15309	0.960773
Bka	5.70522	4.66946	5.17949	3.83939	5.36008	3.40749	2.68714	4.03124	0.350747	1.74972	2.3632	0.153106	0.960773
CG6073	10.8569	8.4587	11.4252	10.7602	9.84126	8.95737	9.90158	7.97135	0.203787	3.94039	2.3625	0.153161	0.960773
CG46460	49.3055	164.231	109.076	96.3559	75.6052	197.357	229.851	152.432	-0.629852	7.79045	2.44239	0.153176	0.960773
Rab8	59.5014	74.1345	51.74	61.1886	67.4256	83.9575	66.7681	68.8387	-0.197143	7.26919	2.36192	0.153207	0.960773
CR44982	0.579202	1.79673	2.20554	2.36241	1.1344	1.02276	1.58226	0.723568	0.653396	-0.253283	2.35986	0.15337	0.960773
RpS15Aa	141.711	105.445	121.387	113.632	121.328	100.76	104.933	105.751	0.182133	6.75627	2.35971	0.153382	0.960773
CG15908	10.3033	8.80621	11.0008	8.07031	8.17349	6.43054	9.03632	8.76304	0.260946	2.26225	2.35858	0.153471	0.960773
Pp1-87B	348.236	359.903	385.842	343.988	297.292	332.386	351.871	326.111	0.160482	9.56349	2.35796	0.15352	0.960773
Mob3	6.69436	5.21705	8.04651	6.45152	6.89384	4.80227	5.87908	4.4562	0.286879	2.48026	2.35377	0.153852	0.960773
CG16935	15.0292	14.7925	19.4613	14.134	16.0902	12.3307	13.1787	14.28	0.207616	4.2993	2.35313	0.153903	0.960773
CR45048	17.8313	16.4427	9.59793	14.0841	18.505	18.3748	16.193	17.4682	-0.259162	4.88327	2.34966	0.154179	0.960773
Ote	3.11707	3.61956	4.85802	4.38959	5.54998	4.11025	4.576	5.21275	-0.259075	2.80974	2.34806	0.154306	0.960773
CG7912	5.74666	4.79162	7.09159	6.82846	5.40427	5.94757	4.21036	5.38426	0.24772	3.50765	2.34228	0.154768	0.960773
Dtd	22.8851	14.2861	27.5191	17.7338	19.9957	14.6755	15.998	17.1303	0.307919	3.31897	2.34165	0.154818	0.960773
nocte	56.7977	63.8483	40.3121	50.3203	66.2533	65.364	60.7781	56.5902	-0.213952	9.26877	2.34045	0.154914	0.960773
CG2493	0.547066	0.592715	0.867985	0.714299	0.765329	0.935826	0.772999	1.11713	-0.379646	0.612097	2.34018	0.154936	0.960773
CG5003	11.2589	10.7615	8.74954	10.3624	13.0246	11.248	11.0027	11.7762	-0.169175	4.78143	2.33891	0.155038	0.960773
ND2	3.1674	3.73981	4.12069	3.64524	1.2743	2.41268	4.79728	1.85012	0.525687	1.70546	2.33753	0.155149	0.960773
Cyp6t3	0.844698	1.47286	1.38624	1.62461	0.507697	0.977812	1.23776	1.17249	0.471209	1.00919	2.33601	0.155271	0.960773
Rrp40	15.236	11.087	14.1644	11.874	12.7716	11.4096	10.6915	11.2921	0.207304	3.67423	2.33528	0.155329	0.960773
id-Dmel_CG10579	71.7563	70.5939	81.3471	70.4205	82.9174	65.0643	108.724	94.5325	-0.231909	8.72666	2.3345	0.155391	0.960773
vvl	0.352279	0.406312	0.375818	0.383513	0.359548	0.252345	0.244188	0.364076	0.339731	0.762382	2.33441	0.155399	0.960773
Mpcp1	4.53957	1.52898	2.15404	3.58749	2.27518	2.19129	2.43786	1.81425	0.465243	1.96823	2.3337	0.155456	0.960773
CG17272	45.8464	40.4434	57.393	45.7974	45.5028	38.0895	43.187	41.8674	0.193323	4.91032	2.33326	0.155491	0.960773
CR45604	22.3873	21.1468	24.511	19.7032	20.1321	18.9064	20.5264	20.5728	0.155422	6.95682	2.33162	0.155624	0.960773
Alg3	6.68061	6.07819	8.05331	7.98257	6.52652	6.32671	6.46888	6.27634	0.193947	3.54239	2.33074	0.155694	0.960773
Tapdelta	49.9918	41.8103	61.3663	50.3153	41.3734	43.8507	47.3373	47.5398	0.20065	5.55336	2.3282	0.155899	0.960773
CG4872	27.9071	22.6804	28.5129	25.7898	25.3109	22.1666	25.0509	22.221	0.172147	5.00441	2.32803	0.155913	0.960773
18047763..18056761	0.19081	0.138628	0.0652376	0.168729	0.217505	0.124791	0.269614	0.217317	-0.52381	0.706695	2.32614	0.156066	0.960773
CR43944	52.7829	61.0289	58.9942	52.1382	45.2479	54.2657	51.6141	53.2306	0.160987	6.36588	2.32485	0.156171	0.960773
msl-1	7.42232	14.7688	9.71927	11.7183	11.2637	16.8136	12.862	13.5227	-0.300502	5.9436	2.3243	0.156215	0.960773
CG6686	72.6505	78.2597	74.3558	74.4712	78.2156	87.2942	85.9887	83.9028	-0.139063	7.99336	2.32099	0.156483	0.960773
CAH3	104.648	115.169	75.3176	92.5984	100.911	115.622	124.468	113.816	-0.208247	8.06445	2.31832	0.1567	0.960773
Dhod	11.5139	12.4562	15.6041	13.8181	10.7182	11.2528	13.0844	12.3514	0.194678	4.21864	2.31704	0.156804	0.960773
Cyp12d1-d	2.77269	1.15279	1.82245	3.02017	1.99674	2.04518	0.396738	1.04554	0.70243	1.71852	2.32743	0.157124	0.960773
CG30159	20.7318	20.0638	17.5963	22.4422	20.2255	16.852	17.8651	18.3614	0.165803	4.91833	2.31267	0.15716	0.960773
CG32369	10.4673	11.9083	8.11014	11.3016	12.1833	11.7701	12.0004	12.3386	-0.185747	6.00319	2.31145	0.157259	0.960773
8019755..8024109	1.4092	1.58549	2.14845	2.26626	1.70925	1.30221	1.85706	1.26999	0.295629	2.89409	2.3096	0.15741	0.960773
kni	0.602945	0.523916	1.15957	0.771194	0.428446	0.532344	0.378648	0.827725	0.51364	0.583745	2.30856	0.157495	0.960773
CG14780	1.35186	0.858022	2.30597	0.994021	0.657815	0.648678	0.442939	1.69446	0.694732	0.332985	2.30794	0.157546	0.960773
dikar	4.29663	9.18337	4.18361	6.83843	7.5439	9.2932	7.36471	7.36553	-0.346236	6.41897	2.31159	0.157584	0.960773
CG3792	4.92686	3.79049	5.00905	3.92104	4.24729	3.10375	3.73794	3.99235	0.251827	2.30569	2.30668	0.15765	0.960773
CG42268	17.43	25.0988	14.1548	17.5034	20.7277	24.16	21.9806	21.7337	-0.235355	7.36534	2.30554	0.157743	0.960773
mRpL42	17.7491	12.0353	17.4489	12.696	15.0033	10.605	13.0321	12.1609	0.264575	3.04796	2.30423	0.157851	0.960773
Taf12	24.9953	30.352	24.4713	23.1225	20.8845	24.2526	18.3752	26.7434	0.211922	4.90077	2.30364	0.157899	0.960773
Fie	1.19243	1.41433	1.37595	1.10716	0.889695	1.15809	1.04838	1.08859	0.303706	0.937402	2.3008	0.158132	0.960773
CG6424	42.7677	48.0712	33.084	35.291	45.9714	48.7757	45.3719	44.4356	-0.190416	8.06674	2.29954	0.158236	0.960773
CG33080	33.755	29.7479	29.5616	32.5553	34.067	28.2112	26.1135	24.6599	0.177948	6.78943	2.29848	0.158323	0.960773
Ufd1-like	14.6208	12.7322	20.2206	14.8893	13.9341	12.8147	13.5469	14.178	0.22199	4.13132	2.29848	0.158323	0.960773
CG15771	127.846	108.256	116.014	143.34	120.584	109.917	112.365	104.382	0.172948	8.42918	2.29787	0.158373	0.960773
CG4577	11.2181	13.7504	9.13575	12.6206	13.5629	13.1403	14.1082	13.3877	-0.191179	5.09511	2.29765	0.158391	0.960773
CR44938	0.958959	1.37205	0.679017	0.650444	0.630125	0.808185	0.65697	0.649254	0.439788	0.301398	2.29596	0.158531	0.960773
CG4612	23.5284	27.9319	19.0664	21.6238	25.8152	29.9861	25.6768	25.3212	-0.19052	6.60749	2.29475	0.158631	0.960773
MED24	3.8965	4.91542	5.44818	4.8948	4.33862	4.01068	4.05438	4.64227	0.191473	3.8617	2.29272	0.158798	0.960773
Son	16.4638	13.7679	10.7552	11.1754	16.6361	15.4434	14.8283	14.6673	-0.214324	5.47452	2.29235	0.158829	0.960773
barc	34.3704	45.6299	38.7457	40.4856	37.8001	50.0731	47.5959	48.8749	-0.189938	6.61816	2.2915	0.158899	0.960773
wcy	39.4122	39.5359	18.5636	27.3522	44.6451	44.7317	36.656	33.4345	-0.329461	7.66898	2.2918	0.158926	0.960773
l(3)72Ab	8.05978	15.7625	8.6875	11.4704	12.8672	15.0692	12.4424	13.923	-0.28429	6.36306	2.28875	0.159127	0.960773
Actbeta	0.4331	0.355634	0.289858	0.344683	0.234279	0.321204	0.212148	0.332954	0.39439	0.286837	2.28694	0.159277	0.960773
CG14135	8.42772	6.68036	8.37987	8.02723	7.80434	5.98964	6.78463	7.17971	0.208546	2.99012	2.28667	0.1593	0.960773
Ih	1.30044	1.50821	2.06041	1.79375	1.17553	1.64496	1.55953	1.30254	0.251826	4.30005	2.28483	0.159453	0.960773
att-ORFB	19.817	19.7639	17.4751	21.9788	20.7841	16.1425	17.9677	16.3031	0.175804	4.64274	2.28479	0.159456	0.960773
CR45612	31.5555	28.7904	55.0848	34.7724	23.6196	28.932	37.6518	31.1011	0.330941	3.74549	2.27894	0.159943	0.960773
CG46339	26.6326	48.9322	24.764	32.3861	41.9079	46.0206	33.1845	44.6693	-0.301048	7.62345	2.27882	0.159953	0.960773
CR44067	21.5249	23.1689	11.4438	16.2812	23.9741	23.3629	21.5751	21.112	-0.289497	3.86475	2.27852	0.159978	0.960773
Ndfip	42.762	49.7247	37.5682	41.3166	49.4134	51.1219	43.6575	51.1178	-0.165785	6.5844	2.27831	0.159996	0.960773
Nost	12.8167	17.8453	9.27013	13.9748	19.1978	15.5389	16.2523	14.6049	-0.260324	6.56092	2.27737	0.160074	0.960773
mRpL21	6.03716	5.26866	7.87495	5.96854	4.5464	5.59509	6.11084	5.4051	0.238535	3.32062	2.27671	0.16013	0.960773
Naxd	4.89997	5.36472	4.34472	4.54102	5.72445	4.87267	5.78182	5.99737	-0.200023	2.69143	2.27571	0.160213	0.960773
CG13654	2.32185	3.417	3.10126	3.47262	3.52259	3.59447	3.74515	3.56076	-0.205612	3.74585	2.27547	0.160233	0.960773
CG43342	4.16607	4.46038	4.85631	4.14446	3.40971	3.07772	4.00451	4.41195	0.265195	1.63252	2.27328	0.160416	0.960773
CG40472	29.8627	25.8584	24.4082	24.4126	27.2066	19.042	24.4839	21.2569	0.210496	3.50628	2.27233	0.160496	0.960773
id-Dmel_CG9075	7063.5	6491.6	9968.35	7782.63	6924.39	6506.52	7628.49	6410.33	0.213977	8.0884	2.27174	0.160545	0.960773
tay	12.0361	14.2317	10.9535	13.3847	14.0352	15.6521	13.9998	13.7957	-0.161158	6.87279	2.27148	0.160567	0.960773
AANATL4	2.64985	1.01386	1.97269	1.27553	0.558053	1.43393	1.61042	0.985704	0.608087	0.171939	2.26989	0.160701	0.960773
CG2962	1.56884	1.70909	0.837596	1.74705	1.96545	1.59187	2.51453	1.75511	-0.387908	1.25665	2.2674	0.16091	0.960773
Vha14-1	89.1701	64.3192	82.7382	68.8347	79.9691	61.7305	65.9527	61.0673	0.209866	5.56556	2.26687	0.160955	0.960773
CG10467	29.0179	30.4211	31.8917	33.0469	27.1595	30.275	27.5287	29.1715	0.147439	5.52721	2.26546	0.161073	0.960773
Etl1	4.12467	6.33809	4.15112	4.9774	5.12915	6.13338	5.90116	6.04978	-0.223147	4.0451	2.26287	0.161291	0.960773
Ugt302K1	1.7168	1.99769	3.24429	2.15344	2.5758	3.00958	2.62505	3.1561	-0.297687	2.7224	2.26262	0.161312	0.960773
CR45952	96.6075	65.8623	65.8498	78.8116	79.0337	64.4846	67.0674	57.0731	0.225244	6.82226	2.26244	0.161328	0.960773
TpnC73F	31.7682	45.0382	100.617	51.109	22.4034	49.8135	41.098	45.0706	0.550335	5.68407	2.31258	0.161463	0.960773
Ostgamma	35.8592	43.9955	36.0437	36.5878	39.8755	46.5884	43.6915	42.9514	-0.160663	5.664	2.25951	0.161575	0.960773
CG14812	20.6173	19.3171	22.9669	21.6936	20.412	18.2731	18.8985	19.4695	0.159279	4.02423	2.2566	0.161821	0.960773
Ocrl	29.1167	31.7966	25.2706	31.3416	32.7846	32.7945	34.1934	32.7359	-0.149921	6.84866	2.25539	0.161924	0.960773
Flo2	13.4732	13.016	8.52494	10.8741	15.7057	13.1734	13.5512	12.0885	-0.223966	5.98655	2.25436	0.162011	0.960773
Dref	8.19313	10.7986	6.87338	9.41728	9.47934	10.8897	10.3148	10.6076	-0.204835	4.78298	2.25417	0.162027	0.960773
Sc2	22.5033	22.7894	29.6193	26.5089	23.9399	21.7993	23.7461	21.8737	0.175192	4.7387	2.25365	0.162072	0.960773
Wdr24	2.28307	2.85609	1.94188	2.68098	2.16223	2.07808	1.86241	2.35227	0.231199	2.63594	2.2521	0.162203	0.960773
cnir	1.16825	1.5322	2.27483	1.48905	1.05551	1.03145	1.27243	1.54363	0.417219	0.3698	2.25115	0.162284	0.960773
CG7414	101.086	96.4154	128.714	119.83	105.586	93.2615	98.1257	104.166	0.178198	8.22709	2.25063	0.162328	0.960773
ECSIT	5.76193	5.23522	6.01419	5.37527	4.54882	4.5173	5.45023	5.33021	0.197393	2.82467	2.25014	0.16237	0.960773
kud	24.0003	20.7905	32.493	24.1344	23.0303	21.496	23.3427	19.8994	0.232608	3.12778	2.24832	0.162525	0.960773
Buffy	8.54691	5.47816	9.68558	9.35588	8.5141	5.97739	6.57943	6.41752	0.292855	2.98523	2.24806	0.162547	0.960773
CR45801	4.49369	4.29516	5.48159	5.7902	4.90949	2.94729	4.47492	4.27713	0.29745	1.79187	2.24803	0.162549	0.960773
CG31342	4.75326	6.41925	3.42122	5.21238	6.25464	6.55125	4.94303	6.36161	-0.260983	4.47839	2.24783	0.162566	0.960773
bam	0.343146	0.536705	0.603364	0.682732	0.731507	0.605931	1.13904	0.565286	-0.466321	0.409814	2.24772	0.162575	0.960773
Nup153	14.4659	24.1664	14.645	19.5997	20.6143	23.4833	21.2814	21.6455	-0.235377	7.33115	2.24683	0.162651	0.960773
Larp7	6.61105	5.29548	4.97823	4.70871	6.80262	6.86455	5.37968	6.44244	-0.21413	3.59911	2.2431	0.16297	0.960773
Rsph1	2.72124	2.96555	3.63432	3.78496	2.37346	2.78078	3.5128	2.15496	0.298276	1.93913	2.24289	0.162988	0.960773
Mcm10	1.48843	2.18103	2.23796	1.90697	2.12433	2.4889	2.32619	2.38387	-0.23294	2.60871	2.24096	0.163153	0.960773
CG10140	0.787571	0.5988	1.13598	1.10994	0.550895	0.405621	0.649152	0.946032	0.528702	-0.315266	2.23978	0.163254	0.960773
Coq7	57.0528	51.989	83.0572	71.078	59.2141	50.7782	57.6418	61.0117	0.228161	5.7913	2.23929	0.163296	0.960773
6392926..6397622	0.128628	0.160594	0.265602	0.276126	0.101023	0.179315	0.191316	0.10409	0.541938	-0.18034	2.23897	0.163324	0.960773
ssp7	9.15926	4.9667	6.87977	8.85387	8.3006	3.28048	4.47678	6.14458	0.456309	1.29389	2.23894	0.163326	0.960773
CG2865	11.0615	13.0225	11.579	14.3978	10.3697	12.5364	11.9621	9.90054	0.183902	6.04784	2.23891	0.163329	0.960773
SmD3	60.8183	54.2803	73.1376	61.2256	54.4101	58.3759	58.4178	53.7619	0.173632	5.46661	2.23614	0.163566	0.960773
id-Dmel_CG2671	36.4141	48.1971	80.4859	63.2665	37.7881	41.2066	53.1437	46.8209	0.371745	1.68329	2.23614	0.163566	0.960773
CG42808	3.5773	3.39983	4.70117	4.49785	5.51426	3.11455	5.89714	6.68431	-0.366412	1.60797	2.23597	0.163581	0.960773
CG31687	15.5192	12.2616	14.4609	14.0214	15.0364	12.3393	11.595	11.6185	0.179758	6.48447	2.2332	0.163819	0.960773
CR44512	19.4977	15.1228	16.3579	16.9231	16.7606	11.5534	10.9707	18.1078	0.268637	3.52151	2.23309	0.163828	0.960773
CG2852	139.242	123.467	159.862	139.004	129.108	121.793	124.803	135.494	0.160543	7.30394	2.2329	0.163844	0.960773
CG18858	49.5387	58.6958	48.7721	50.3887	59.3569	63.8567	56.5563	54.1409	-0.150518	6.80608	2.23239	0.163889	0.960773
CG17032	7.25947	6.02844	9.25453	6.57314	6.44619	6.86998	6.08083	5.88997	0.227341	3.32395	2.23167	0.16395	0.960773
ValRS	30.6985	36.3584	28.046	32.3193	40.643	35.2745	33.6497	35.1332	-0.159772	6.85787	2.2313	0.163982	0.960773
CR44891	9.87857	13.5867	4.31004	8.60502	14.7595	13.712	10.4167	10.5792	-0.417148	2.80753	2.22931	0.164154	0.960773
CR45324	32.2364	31.9106	15.6123	21.0888	42.0709	34.1202	30.3407	24.3981	-0.351107	5.07192	2.23281	0.164187	0.960773
CG8841	9.04664	8.60346	5.42545	7.63113	10.906	8.9252	8.64492	8.35878	-0.237316	4.94763	2.22776	0.164288	0.960773
id-Dmel_CR33867	1.53479	2.60338	1.39684	1.44081	2.37897	1.67953	2.54535	2.49274	-0.356583	1.59339	2.22507	0.16452	0.960773
CR44368	27.5861	25.0245	25.511	28.6627	26.7609	25.0718	22.8751	23.0506	0.152352	5.36415	2.22445	0.164574	0.960773
htk	20.4718	22.3578	13.6407	19.4731	25.6208	22.5711	21.5464	20.152	-0.219536	7.41175	2.22331	0.164673	0.960773
CG14805	22.1505	18.8815	31.5673	25.6742	21.2155	18.9637	22.5708	22.3259	0.233192	5.29111	2.22254	0.16474	0.960773
AP-1mu	39.4261	40.3356	40.6017	38.6809	44.2059	43.7519	46.9702	42.4662	-0.133592	6.20631	2.22186	0.164799	0.960773
CG18213	0.46684	0.464654	0.440746	0.316649	0.613515	0.487117	0.499729	0.570965	-0.336721	0.592825	2.22163	0.164819	0.960773
mRpS28	19.3734	12.1757	18.7974	17.6249	15.5364	12.3107	16.6891	13.4432	0.255415	3.45254	2.22108	0.164866	0.960773
pn	3.1837	3.89659	4.50251	4.65422	3.7297	3.4108	3.60249	3.41386	0.221044	2.65131	2.22056	0.164911	0.960773
CG32032	2.81794	1.51555	1.02683	1.91806	1.54922	0.707108	1.50886	1.42523	0.518465	0.792911	2.22054	0.164913	0.960773
id-Dmel_CG3479-2	0.129218	0.1402	0.153136	0.201508	0.182401	0.160339	0.282924	0.201363	-0.381582	0.776797	2.21989	0.164969	0.960773
PMCA	56.1872	80.6011	41.7328	62.8868	73.1875	85.0229	62.0451	74.8553	-0.268929	9.00364	2.21894	0.165052	0.960773
Naus	37.3345	35.6086	21.2508	29.2325	43.964	38.0681	33.7514	33.758	-0.252346	6.83984	2.21877	0.165067	0.960773
CG31360	2.93974	2.23512	3.61833	2.82701	3.10731	2.16293	1.75384	2.07165	0.376346	0.795891	2.21866	0.165076	0.960773
CG6847	2.29628	2.42112	3.15857	2.87437	2.21254	2.35635	1.61873	2.86425	0.271156	3.38086	2.21799	0.165135	0.960773
al	1.19727	1.34939	1.66598	0.665594	0.73895	2.14525	2.81956	1.65812	-0.575744	1.49941	2.2183	0.165159	0.960773
CG9328	1.87942	2.54689	2.74274	2.24086	2.52615	3.2211	2.39526	3.24027	-0.253072	2.59456	2.21652	0.165262	0.960773
CG18327	4.06443	1.74507	1.58631	2.64601	2.17407	1.7151	1.32314	2.18263	0.469992	1.25246	2.2151	0.165386	0.960773
id-Dmel_CG31038	0.167745	0.1658	0.0927484	0.166875	0.241189	0.15736	0.177767	0.214929	-0.384542	0.713095	2.21471	0.16542	0.960773
mio	3.7435	4.61285	4.30722	4.82632	3.86257	3.8845	3.93168	4.10388	0.171253	3.62722	2.21372	0.165507	0.960773
SmydA-9	4.60882	3.75789	4.90552	3.76806	3.80433	4.60703	2.99413	3.15622	0.250684	3.25573	2.21356	0.165521	0.960773
CG17190	39.0654	32.3426	68.9748	48.7736	40.3481	37.2322	38.4706	40.2616	0.300811	5.33489	2.21329	0.165544	0.960773
shams	2.46564	3.72345	3.82618	2.24139	3.29076	3.37798	4.84546	4.00343	-0.318847	2.39267	2.21299	0.16557	0.960773
Arl6IP1	40.3744	35.0205	38.3934	39.2115	38.3655	32.4791	34.5834	34.8546	0.150474	5.57044	2.21258	0.165606	0.960773
CG4849	10.0088	11.287	6.48544	9.01492	12.6679	11.6147	10.1093	9.79423	-0.239996	4.9834	2.21208	0.16565	0.960773
Krn	34.0762	38.8039	25.1208	30.9324	40.0385	40.9096	32.5199	37.7334	-0.206677	5.56761	2.21106	0.165739	0.960773
mld	1.2255	2.11024	1.63817	1.60119	1.78285	1.82873	1.9999	2.28067	-0.241847	3.74154	2.20917	0.165904	0.960773
Pgd	51.0617	41.7495	42.6558	42.9678	46.3236	38.7417	39.1532	37.7486	0.165491	6.33498	2.20901	0.165918	0.960773
Tpi	136.357	111.429	134.852	147.182	134.577	109.362	115.431	119.207	0.172651	7.61885	2.20747	0.166052	0.960773
CR46048	42.6446	68.4729	48.8191	45.1042	56.9882	70.0085	76.7882	47.4537	-0.271785	4.75224	2.20401	0.166356	0.960773
lqf	77.1476	82.5021	50.6071	63.0821	83.3393	88.0518	76.1223	76.2445	-0.221385	8.92549	2.20399	0.166358	0.960773
Neos	9.12909	8.54939	9.82507	6.85496	8.53469	6.91698	7.46259	7.42305	0.204428	3.55829	2.20382	0.166373	0.960773
CG11975	8.1101	9.55902	10.3534	9.5283	9.7543	7.64645	8.67673	7.51137	0.18534	3.95124	2.20368	0.166385	0.960773
CG13625	13.3631	18.7593	20.221	15.6202	17.7882	21.5052	20.1408	20.1961	-0.20649	5.27322	2.20158	0.16657	0.960773
20157413..20164268	37.4334	33.1207	38.7472	37.2161	30.9975	25.7857	35.262	38.0534	0.195898	7.89084	2.20071	0.166646	0.960773
CG5664	3.7239	3.90502	5.162	3.72863	4.62326	4.99582	4.53292	5.20512	-0.205653	3.56699	2.19979	0.166727	0.960773
CG15443	2.88407	2.07826	2.1409	2.11985	3.22093	2.65989	2.73408	2.52434	-0.245969	2.15931	2.19939	0.166762	0.960773
Ctr1B	49.7493	63.1077	63.4507	37.7076	33.8576	57.1217	40.6403	45.5948	0.293338	5.54574	2.1992	0.166779	0.960773
Klp61F	0.870733	1.2591	1.54503	1.11137	1.20281	1.49403	1.57855	1.64191	-0.285326	2.38893	2.19849	0.166842	0.960773
nwk	17.7826	17.8654	11.813	15.991	20.0664	17.2434	17.7154	19.0505	-0.199467	6.59415	2.19808	0.166878	0.960773
mael	0.709253	0.99762	0.835461	0.440984	0.496113	0.613158	0.654194	0.511174	0.411975	0.560047	2.19597	0.167063	0.960773
CG8078	4.72589	3.43382	3.75064	2.7017	2.23371	3.00195	3.28343	3.47283	0.308344	2.32497	2.19573	0.167084	0.960773
CG5921	139.121	128.465	125.019	134.394	164.852	136.531	143.114	151.305	-0.152082	9.35493	2.19445	0.167198	0.960773
par-6	27.3095	27.4426	16.6034	20.522	27.3873	26.7322	27.5827	27.5737	-0.22696	6.25229	2.1933	0.167299	0.960773
Unc-89	0.652222	1.06981	1.0625	1.03528	0.742475	0.995035	0.72507	0.76732	0.263213	3.55441	2.19307	0.16732	0.960773
iotaTry	105.074	97.0727	97.1578	93.5849	84.9452	101.454	90.0443	82.369	0.154764	6.26629	2.19132	0.167474	0.960773
Usp10	6.53228	9.49523	5.01058	7.02711	9.29139	8.56953	8.31575	7.61385	-0.245665	6.02621	2.18976	0.167613	0.960773
CG7296	2.89994	3.07655	7.23725	4.22671	2.51593	3.21535	4.12936	3.17558	0.438837	1.86605	2.18954	0.167632	0.960773
CG4945	1.35055	0.792133	1.57232	1.25957	1.01217	1.16047	0.908721	0.927018	0.333708	1.59406	2.18813	0.167757	0.960773
Pura	0.625209	0.502612	1.00899	0.869881	0.583099	0.609902	0.453033	0.743649	0.353799	2.31161	2.18725	0.167835	0.960773
RIOK1	11.8737	12.885	12.0404	12.3938	13.409	15.5927	11.7923	15.4153	-0.169268	4.8072	2.18692	0.167865	0.960773
eIF4A	340.959	317.68	411.425	346.142	321.259	313.883	340.253	306.147	0.169064	9.7091	2.18566	0.167977	0.960773
14468500..14473647	2.26071	1.67376	1.86739	1.68367	2.90343	1.58152	2.81034	2.04781	-0.292557	3.44356	2.1846	0.168071	0.960773
CG46315	39.1065	46.5649	33.7007	35.0023	42.085	47.2962	43.5875	43.7283	-0.172622	7.89753	2.18453	0.168078	0.960773
Pms2	1.90371	2.95845	2.12428	2.27884	2.84859	2.99218	2.4633	2.69383	-0.224395	2.95542	2.18343	0.168175	0.960773
mask	15.709	30.3218	16.4449	22.8233	26.6238	28.9321	25.2435	24.0693	-0.277836	8.44017	2.18267	0.168242	0.960773
Ir75d	0.577649	0.690161	0.682422	0.451513	0.46178	0.352149	0.595965	0.462582	0.381972	0.37097	2.18228	0.168277	0.960773
CG8924	0.642138	0.495737	0.313486	0.540529	0.691025	0.588753	0.604891	0.759471	-0.378446	0.639188	2.18123	0.168371	0.960773
Lztr1	7.05649	7.16094	4.25747	5.22478	7.03273	8.15367	6.8821	6.48496	-0.245362	4.82561	2.17924	0.168548	0.960773
E(spl)m6-BFM	8.78156	3.06194	2.61395	3.36642	3.91247	3.55565	2.71349	2.20375	0.554663	2.12576	2.18643	0.168622	0.960773
Pez	8.30278	10.262	5.66605	6.92369	9.93552	9.5106	9.13898	8.71132	-0.236718	5.28198	2.17729	0.168723	0.960773
CG34330	357.741	343.162	606.653	497.85	350.32	371.961	405.639	402.703	0.262982	8.18969	2.17589	0.168848	0.960773
CG12402	0.228698	0.233697	0.295563	0.245713	0.443653	0.258456	0.344692	0.290096	-0.38886	0.107732	2.17588	0.168849	0.960773
CG5116	6.5507	8.03684	8.76143	9.47886	7.32445	7.13098	7.56148	7.3799	0.182564	4.32193	2.17445	0.168977	0.960773
gbb	25.7441	21.6987	35.3428	28.1997	23.3417	23.4789	26.0807	24.2497	0.217	5.45858	2.17444	0.168978	0.960773
RpS14a	734.585	584.637	971.817	897.093	700.124	620.014	771.522	660.299	0.238254	9.34889	2.17261	0.169142	0.960773
Sptr	7.56702	8.65533	10.0799	8.6348	7.93954	6.33709	7.75705	8.71525	0.207912	3.23953	2.1726	0.169143	0.960773
spd-2	0.543485	0.653279	0.557449	0.695142	0.868937	0.76166	0.666361	0.696357	-0.264007	1.36175	2.17179	0.169216	0.960773
id-Dmel_CG8095	109.527	137.968	264.183	198.938	88.9695	123.529	187.71	134.45	0.430827	2.82087	2.17121	0.169349	0.960773
CG5789	17.5754	22.1914	17.266	19.3943	24.318	22.9466	19.5099	20.4348	-0.167035	6.75482	2.1698	0.169394	0.960773
nAChRalpha3	0.338987	0.254054	0.461009	0.319163	0.279459	0.256537	0.327877	0.264675	0.30556	1.74059	2.16884	0.16948	0.960773
sktl	82.601	92.6882	54.0105	72.1108	99.5291	92.5114	86.7899	79.7856	-0.227531	8.40228	2.16828	0.169531	0.960773
CG13850	25.1428	27.8574	18.6589	25.1268	27.7714	29.192	26.5017	28.3302	-0.185033	5.65745	2.16577	0.169756	0.960773
arr	5.80117	8.56293	4.14187	5.98637	7.2369	8.51938	7.05583	7.17761	-0.270954	5.35858	2.16556	0.169775	0.960773
Alg2	36.9651	38.3027	47.2252	41.3567	36.9652	34.8606	37.0315	39.9701	0.162855	5.85351	2.16489	0.169836	0.960773
CG7149	2.12675	2.12856	2.58793	2.82096	1.81521	2.0029	1.99125	2.50202	0.240341	2.4868	2.16469	0.169854	0.960773
CG9380	109.983	125.783	89.9806	107.296	133.739	120.607	122.054	118.809	-0.170248	9.20629	2.16448	0.169872	0.960773
RpS14b	122.293	103.898	126.118	114.293	121.06	100.919	99.3942	103.187	0.162039	6.05733	2.16415	0.169902	0.960773
CG13014	1.44264	1.5356	2.1502	1.49495	1.34547	1.27371	1.47221	1.27079	0.325225	0.714929	2.16126	0.170163	0.960773
Kmn1	12.5987	11.8132	14.7208	14.2381	13.4076	10.9273	11.3896	12.1678	0.181147	3.67195	2.1611	0.170178	0.960773
CG9948	4.67621	3.95427	5.58015	4.58387	4.53145	4.16893	3.95372	3.81412	0.214773	2.63337	2.15971	0.170304	0.960773
Gycalpha99B	0.459277	0.308112	0.420852	0.430019	0.592122	0.393572	0.648955	0.519232	-0.386692	0.227637	2.15873	0.170392	0.960773
l(3)07882	49.4917	36.4279	47.8825	42.5491	44.1308	38.4264	39.2071	36.9373	0.17855	7.4993	2.15843	0.170419	0.960773
CG6674	21.8778	17.1731	22.3722	19.1375	20.6153	17.7174	17.4819	16.094	0.189612	4.01204	2.15723	0.170528	0.960773
CG10405	3.0121	1.74883	5.84546	3.8818	1.53231	1.93411	1.41869	4.50623	0.645078	1.49752	2.16358	0.170667	0.960773
Edc3	26.0445	24.8979	15.7174	22.0389	30.3647	28.5932	24.0692	23.0944	-0.234303	6.62736	2.155	0.170731	0.960773
Apc2	2.38546	2.25544	2.43463	2.56105	1.97514	2.23125	2.22484	2.26963	0.170759	3.22096	2.15331	0.170884	0.960773
CG45087	40.3169	32.6179	26.7147	32.982	25.1472	25.4774	38.6049	23.0344	0.264686	6.2525	2.152	0.171003	0.960773
Pepck1	40.3169	32.6179	26.7147	32.982	25.1472	25.4774	38.6049	23.0344	0.264686	6.2525	2.152	0.171003	0.960773
Tgi	9.14329	7.75565	7.0387	6.96871	7.70776	7.0187	6.37629	6.65594	0.180186	4.15735	2.15172	0.171028	0.960773
daw	3.81773	1.6794	0.910278	1.54049	1.6168	1.53917	1.40365	0.982685	0.549116	2.48053	2.16065	0.171202	0.960773
Hexo2	5.11149	4.32467	6.06963	5.01106	4.64249	5.0246	4.47906	3.94097	0.205926	3.37742	2.14964	0.171218	0.960773
CG10778	17.0056	11.0946	9.59639	13.3949	11.7322	8.51499	12.6398	10.0289	0.27828	4.01046	2.14944	0.171236	0.960773
13375533..13375856	2.74799	2.86537	1.69871	1.36687	3.29517	2.42622	3.14329	3.30089	-0.453821	-0.137974	2.1487	0.171304	0.960773
Rfx	1.12727	1.608	1.74976	1.58252	1.17409	1.30345	1.20203	1.53966	0.23904	2.98205	2.14834	0.171336	0.960773
mRpL15	27.8118	23.7959	34.8022	27.8827	26.9185	23.573	25.6746	25.954	0.18762	4.80299	2.14786	0.17138	0.960773
DCTN3-p24	158.233	124.795	121.703	125.186	178.646	140.374	149.207	143.154	-0.180221	7.38746	2.14583	0.171565	0.960773
CG3386	11.308	8.34499	9.93572	9.06346	12.3624	10.5044	11.7122	10.1971	-0.186278	4.21865	2.14514	0.171628	0.960773
CG11403	2.94876	2.4896	1.85365	3.46981	3.63267	2.9532	3.47215	3.1297	-0.26703	3.12275	2.14363	0.171767	0.960773
CG8051	112.341	133.375	110.792	124.177	134.801	136.149	136.035	131.46	-0.140755	8.35128	2.14353	0.171775	0.960773
CG31102	7.60549	7.93035	9.98794	8.86307	6.68791	8.63348	6.87435	8.16125	0.202455	3.83612	2.14275	0.171848	0.960773
RpS3A	222.422	208.137	238.703	219.58	222.347	207.2	185.051	202.572	0.14636	8.16923	2.14265	0.171856	0.960773
TotA	4.17386	2.30491	1.52092	0.874148	5.53178	3.97605	2.58668	2.21656	-0.656275	0.802982	2.14213	0.171904	0.960773
bor	51.0428	49.3568	29.7181	43.7226	53.471	48.0597	51.4468	53.7014	-0.226083	6.86811	2.13945	0.172149	0.960773
CG11892	0.435321	0.451336	0.273992	0.413378	0.313728	0.698813	0.503267	0.760593	-0.502481	-0.25199	2.13914	0.172178	0.960773
Pitslre	41.1333	48.7341	38.5655	46.0576	46.5145	55.0128	47.2312	49.0698	-0.158722	7.72386	2.13895	0.172195	0.960773
CG30120	2.22198	1.88984	2.08593	2.02313	1.97866	1.57387	1.83294	1.86984	0.205269	2.31056	2.13745	0.172333	0.960773
CG5189	2.22198	1.88984	2.08593	2.02313	1.97866	1.57387	1.83294	1.86984	0.205269	2.31056	2.13745	0.172333	0.960773
Qsox1	39.0317	35.6447	43.2322	48.5003	43.3642	31.2787	32.1145	40.2021	0.205106	6.68276	2.13425	0.172627	0.960773
ND-ACP	80.9306	61.6761	76.5217	76.9417	72.2745	55.216	66.631	70.767	0.186486	5.88623	2.13221	0.172816	0.960773
CG3609	167.314	114.112	156.91	153.157	149.413	139.571	115.599	116.806	0.208865	7.56982	2.13207	0.172828	0.960773
CG32267	22.9545	14.1203	19.8092	18.0484	18.4368	13.2049	15.1913	17.1843	0.253659	3.09732	2.13082	0.172943	0.960773
Mtl	22.5876	23.9076	20.2887	21.0758	24.9765	25.1135	24.2888	23.8965	-0.138008	5.82014	2.12975	0.173042	0.960773
31279431..31285563	0.938443	1.36237	2.23754	1.74852	0.94777	1.2085	1.33822	1.47478	0.360061	3.11965	2.12549	0.173437	0.960773
l(2)k09913	23.8849	20.8895	18.5667	22.8557	21.8826	19.5161	17.9772	18.7701	0.166575	5.63242	2.1245	0.173528	0.960773
Taf6	7.33091	7.98673	8.03086	8.43143	6.69291	7.40104	6.43947	8.17425	0.169713	3.9647	2.12263	0.173702	0.960773
CR46487	1.27723	0.450734	0.500536	0.623315	0.584365	0.489367	0.56752	0.416842	0.498381	0.749552	2.12205	0.173755	0.960773
CG11309	70.057	47.4584	47.3419	56.8394	57.2821	46.8677	48.4286	41.3245	0.220062	6.84165	2.12089	0.173864	0.960773
CG13912	38.8342	26.2809	21.486	24.363	31.1067	21.5881	21.678	16.3617	0.318419	4.37126	2.11961	0.173982	0.960773
SK	0.589775	0.812471	1.09157	0.943972	0.533714	1.00276	0.640824	0.561139	0.348106	3.0831	2.11804	0.174128	0.960773
CG6201	1.77728	1.89809	1.90773	2.43965	1.54193	1.75163	2.0246	1.5755	0.241843	2.1262	2.11749	0.174179	0.960773
Mrtf	11.7284	16.5153	10.5465	14.2834	15.4587	16.0966	15.9494	14.2684	-0.197129	6.9404	2.11568	0.174348	0.960773
Prosalpha7	75.7162	58.9749	89.5497	68.3226	72.8955	56.5523	67.5493	60.8632	0.208663	6.07185	2.1155	0.174365	0.960773
cry	12.0082	10.7111	11.9017	12.6466	11.043	11.8015	10.2374	10.1211	0.154126	4.42719	2.11119	0.174768	0.960773
Lk	6.19709	4.54179	4.98215	4.75004	5.35333	3.49814	3.7801	4.49078	0.284103	1.58546	2.11071	0.174813	0.960773
RpL18A	338.313	502.979	791.74	641.532	358.914	465.29	472.844	532.555	0.3365	8.3501	2.11419	0.174819	0.960773
ck	2.3621	5.12919	2.38865	3.31542	3.75713	4.98627	3.67342	4.42422	-0.332457	4.79779	2.10979	0.174979	0.960773
Act42A	448.832	698.729	628.03	586.616	610.129	703.441	749.967	703.183	-0.20667	10.0246	2.10882	0.17499	0.960773
CG10702	0.651915	0.860548	1.16838	1.0142	0.827924	0.906231	0.620633	0.679781	0.305482	1.9688	2.10822	0.175046	0.960773
Rexo5	12.2342	13.6515	9.56968	11.3091	14.5607	14.3959	11.6674	13.4005	-0.184612	5.21062	2.10738	0.175125	0.960773
DNApol-epsilon255	1.33711	1.957	1.55361	1.75509	1.758	1.92248	1.93306	2.06568	-0.19566	3.61843	2.10663	0.175195	0.960773
ND-B12	141.098	108.962	176.376	153.259	125.624	107.018	139.24	133.623	0.22323	6.36397	2.10644	0.175212	0.960773
CG15279	0.236125	0.287246	0.324364	0.391501	0.220222	0.476517	0.444857	0.626696	-0.491243	0.171908	2.1054	0.17531	0.960773
CR44959	46.1485	42.047	20.0603	27.4197	53.0633	43.3122	38.7076	39.5477	-0.338176	4.28892	2.10593	0.175312	0.960773
CG17333	7.54597	5.92568	8.79397	8.81398	5.98732	5.66799	7.49727	7.35961	0.253085	2.62289	2.1047	0.175376	0.960773
PIG-A	1.3589	0.960863	1.29363	1.21666	1.9169	1.13979	1.7281	1.33849	-0.315923	1.39072	2.10458	0.175388	0.960773
CR43480	4.6517	4.61149	1.9708	3.59155	5.62049	5.16135	4.22491	4.1632	-0.344546	3.29084	2.10424	0.17542	0.960773
Rcd1	9.07423	13.3572	9.24832	11.8224	12.0574	12.8783	13.0315	12.4677	-0.191594	5.60427	2.1024	0.175592	0.960773
toc	2.98646	3.32999	3.00312	3.06644	3.25129	3.87789	3.53382	3.27947	-0.147836	5.21419	2.1022	0.175611	0.960773
CG7914	2.01647	1.085	1.96884	1.72311	1.30199	1.2782	1.55857	1.26699	0.352304	0.950694	2.10203	0.175627	0.960773
htt	5.09289	6.54477	3.32069	5.4762	7.02261	6.41963	5.97135	5.41163	-0.2579	6.08922	2.10164	0.175664	0.960773
sdt	10.0935	11.0325	8.01829	10.0612	12.0297	10.6711	11.6809	10.3083	-0.165217	6.85479	2.10137	0.17569	0.960773
ImpL2	33.1097	107.769	76.9062	64.9626	49.2941	128.079	151.116	101.615	-0.58953	7.89094	2.16534	0.17587	0.960773
CG17816	0.73753	0.932336	0.589575	0.729284	0.911615	0.937526	0.996086	0.742893	-0.239351	2.57163	2.09834	0.175975	0.960773
endos	63.8256	64.6625	57.8258	56.1989	77.6769	70.1786	61.6345	64.5272	-0.151598	6.74786	2.09727	0.176077	0.960773
Arp10	19.1286	17.868	21.5948	20.5122	18.0333	16.6329	19.3451	18.3421	0.153098	4.86571	2.09658	0.176142	0.960773
CG30486	1.44369	2.22908	1.62317	3.35113	1.62265	1.47074	1.70865	1.8142	0.410568	0.765661	2.09658	0.176142	0.960773
step	3.98809	4.81101	2.51989	3.29844	4.59502	4.38522	4.26477	4.36343	-0.245086	4.26911	2.09493	0.176297	0.960773
25141706..25149342	0.274804	0.292512	0.249835	0.128405	0.399976	0.224245	0.337308	0.316091	-0.407099	1.12626	2.0937	0.176414	0.960773
CG4572	38.3205	36.5392	37.4545	40.0429	38.4255	37.0192	32.2996	32.4453	0.144868	6.10262	2.09269	0.17651	0.960773
CG12065	266.389	282.024	189.042	253.842	313.446	290.736	295.096	254.951	-0.195965	9.57805	2.0925	0.176528	0.960773
CSN8	58.9333	49.7863	75.5594	61.786	50.1523	51.1566	61.1224	54.9165	0.203596	5.21846	2.09224	0.176552	0.960773
ry	9.66337	8.5691	8.98478	8.66504	8.05519	8.75193	8.80586	7.13016	0.156454	5.22061	2.09197	0.176578	0.960773
Npc1a	4.27606	6.84274	5.43534	5.70226	5.65973	7.28065	6.59236	6.56637	-0.208714	4.97525	2.09139	0.176633	0.960773
Vps2	142.582	126.88	124.189	109.145	159.499	134.57	154.281	127.124	-0.169493	7.3937	2.08995	0.176769	0.960773
cnn	5.7479	10.3433	7.99456	8.49033	7.52421	10.6345	10.2247	11.19	-0.260964	5.80465	2.08991	0.176773	0.960773
CG8768	4.41496	3.64447	4.48796	3.29404	3.77446	3.48035	3.31719	3.18195	0.228025	2.18155	2.089	0.17686	0.960773
ALiX	96.5271	115.997	71.6967	86.2476	121.774	109.814	104.683	97.7776	-0.205433	8.18221	2.08882	0.176877	0.960773
CG10914	4.48952	3.13565	4.16225	4.03501	3.29196	3.64945	3.70411	3.25801	0.210884	2.94461	2.08787	0.176967	0.960773
CG15436	2.29866	2.54959	1.92432	2.19706	2.71133	2.34786	2.31393	3.72486	-0.281899	1.84857	2.08768	0.176985	0.960773
CR45393	2.62382	2.27991	1.73008	1.36725	1.6314	1.82017	1.29466	1.32073	0.422559	-0.0636361	2.08689	0.17706	0.960773
Vha100-2	48.0723	58.573	35.5875	49.6294	56.6714	54.2413	55.0453	57.1399	-0.195284	7.38365	2.08633	0.177113	0.960773
eIF2D	21.383	18.8475	26.0293	23.3168	22.7619	15.9055	21.3793	19.071	0.205101	5.28167	2.08607	0.177139	0.960773
CG12935	2.51736	2.44183	4.15844	3.08424	1.8041	1.73128	3.66933	2.16444	0.402436	1.71856	2.08435	0.177302	0.960773
CG6013	137.365	91.2292	99.9033	90.0648	136.898	114.894	129.965	112.995	-0.214666	6.59073	2.08407	0.177329	0.960773
KdelR	182.721	160.446	128.212	143.201	199.46	170.185	181.078	159.75	-0.184171	8.17499	2.08404	0.177332	0.960773
CG18265	0.543528	0.722505	0.332281	0.540709	0.758702	0.730949	0.60355	0.598407	-0.305816	2.43191	2.08394	0.177342	0.960773
CG5639	0.723395	0.978631	1.10817	1.16632	0.756098	0.693749	0.804797	1.06071	0.284764	2.23465	2.08162	0.177562	0.960773
Rpb8	35.3824	29.515	51.0084	42.5129	32.9136	28.3994	39.9527	34.0894	0.25189	4.67227	2.08034	0.177685	0.960773
CG6700	16.2621	27.5841	16.219	22.3557	21.5241	29.8236	22.5964	26.0522	-0.259013	6.6836	2.07934	0.177781	0.960773
CR32224	2.9556	1.92173	2.46966	2.77129	2.94664	1.58971	1.60009	1.86083	0.366491	1.1225	2.07894	0.177819	0.960773
CG7239	30.3825	22.2888	17.8225	23.0749	29.1825	28.9241	26.6369	26.0396	-0.218245	5.48536	2.07858	0.177854	0.960773
CG4020	0.522664	0.630693	0.505829	0.771542	0.86485	0.58055	0.952929	0.793894	-0.364879	0.473455	2.07628	0.178073	0.960773
pgc	2.72856	2.80065	4.11726	4.12381	2.93629	2.3164	3.36114	2.82373	0.291024	1.95456	2.07573	0.178126	0.960773
Nop56	59.9904	50.8455	86.7076	67.6328	59.381	51.6795	62.9269	56.7034	0.226789	6.76029	2.07298	0.17839	0.960773
CG13398	32.5197	32.5322	21.7184	26.9002	33.6452	35.322	32.9087	30.2855	-0.193985	6.54586	2.07173	0.178511	0.960773
CR44144	41.5678	52.7956	109.588	58.6874	42.2288	50.883	61.0136	50.4616	0.383664	5.30961	2.08055	0.178515	0.960773
COX7C	31.3881	32.6851	20.8194	24.8838	36.1928	34.9536	29.1812	29.4821	-0.217519	4.67712	2.07081	0.178599	0.960773
CG34347	0.924821	0.91095	0.297317	0.709471	1.23587	0.832779	0.827834	1.00368	-0.427321	2.55704	2.06897	0.178792	0.960773
cyc	86.3737	97.9798	66.2038	75.0827	91.196	99.3589	89.6953	94.1338	-0.178767	7.15112	2.06822	0.178848	0.960773
CG18547	104.813	78.6219	111.666	102.032	93.3747	91.6216	86.9479	85.8887	0.176184	6.74012	2.06579	0.179083	0.960773
HBS1	33.3881	32.8965	29.2293	33.9789	38.1765	33.1901	38.1529	35.6583	-0.140665	6.3406	2.06404	0.179252	0.960773
Taf5	3.23098	4.34809	3.20007	3.21422	4.6456	3.61335	4.92043	3.49295	-0.228419	3.18687	2.06295	0.179357	0.960773
tko	19.6049	15.3058	22.2084	20.4149	18.4145	15.1632	17.6419	17.9205	0.190914	4.87501	2.0624	0.17941	0.960773
Atg14	26.4815	33.1475	27.4502	27.5647	32.5491	31.9866	31.7837	32.3254	-0.143337	5.8269	2.06026	0.179618	0.960773
vap	6.24263	10.0308	8.69348	7.20389	7.62539	10.9351	10.0675	9.76283	-0.234467	5.29818	2.05973	0.179669	0.960773
CR45204	9.09217	22.5269	7.33842	13.9316	17.3085	20.277	17.5892	16.1928	-0.413012	4.92383	2.07012	0.179815	0.960773
CG17163	3.72255	2.82501	3.55279	2.94182	3.00134	2.25766	2.98226	3.05903	0.231994	2.49136	2.0561	0.180022	0.960773
clu	13.4634	19.2047	9.65237	14.2201	16.6427	18.7211	15.5505	17.257	-0.248829	6.58468	2.05598	0.180033	0.960773
CG5521	3.12971	4.66918	2.27015	3.29734	4.62737	4.17024	3.71423	3.78112	-0.262899	4.84371	2.05496	0.180133	0.960773
Ucp4A	14.9216	14.9797	14.0107	15.5127	15.8538	13.107	12.9483	12.6219	0.148982	4.89323	2.05165	0.180455	0.960773
m-cup	12.5029	14.3912	8.28281	9.21802	12.615	14.3854	12.931	13.151	-0.235576	5.53055	2.04918	0.180696	0.960773
CG9231	18.8462	16.0302	12.6495	11.0175	15.2659	10.6068	9.61914	13.4926	0.283458	3.51714	2.04851	0.180762	0.960773
bbg	59.1349	113.545	60.007	78.203	84.4891	108.436	90.4735	99.4438	-0.281412	9.7618	2.0471	0.1809	0.960773
mir-4956	48.9203	53.0644	21.0117	30.8221	57.2852	54.4699	48.8988	42.0483	-0.371072	2.39987	2.04203	0.181397	0.960773
Cyp313a4	1.57932	2.70613	2.13352	2.68241	1.65257	1.90453	1.92313	2.10992	0.283884	1.80982	2.03955	0.18164	0.960773
eEF1alpha1	956.579	1225.16	1501.52	1422.08	990.821	1136.3	1107.7	1225.3	0.217781	11.5258	2.0385	0.181743	0.960773
CG4645	12.464	9.60782	9.89863	9.41154	10.224	8.65115	8.62894	9.63244	0.181795	4.06147	2.03772	0.18182	0.960773
Uros1	5.27802	4.84944	3.94585	3.54973	4.45454	2.9207	3.58885	4.10758	0.251614	2.81847	2.03687	0.181904	0.960773
CG9839	7.78227	8.32134	11.6656	10.5058	7.93644	6.90953	9.78361	8.59673	0.227866	4.29342	2.03631	0.18196	0.960773
CG31729	28.1551	30.2583	14.6937	22.5225	35.8384	29.688	25.8282	27.1532	-0.285628	7.24009	2.03629	0.181961	0.960773
Pask	1.19842	2.14127	2.45459	1.77838	1.88147	2.23963	3.4714	2.19771	-0.35006	2.80041	2.03625	0.181965	0.960773
Rac2	104.231	113.754	87.342	95.616	118.455	118.252	115.733	101.495	-0.155652	8.01903	2.03497	0.182091	0.960773
Act57B	92.5541	132.909	173.245	155.726	82.3295	132.069	122.699	123.291	0.289643	7.77504	2.03296	0.18229	0.960773
Ccdc85	1.62843	1.78822	1.29396	1.35807	1.9098	2.22119	1.67175	1.49926	-0.242648	2.46276	2.03296	0.18229	0.960773
CG32695	0.867403	0.899314	0.682432	1.41202	0.661894	0.765834	0.817089	0.776708	0.37819	0.535981	2.03257	0.182329	0.960773
woc	24.8932	25.8229	16.2947	21.322	28.2842	28.2122	23.2175	24.0613	-0.208885	7.2474	2.03145	0.182439	0.960773
CG11377	79.2243	73.052	70.0928	75.3163	77.7664	80.1453	88.2907	86.7675	-0.137822	6.96387	2.03066	0.182518	0.960773
CG9331	33.6897	34.1239	38.8884	44.5327	34.3607	37.5906	32.4639	32.5802	0.166776	6.59124	2.03051	0.182533	0.960773
ND-B22	38.5521	37.1059	70.983	50.0829	38.6113	34.3602	44.879	45.8528	0.289725	5.29832	2.03028	0.182555	0.960773
CG13097	15.3569	19.2799	15.3635	18.8645	18.3795	20.0153	18.3618	21.7848	-0.167367	5.53924	2.02917	0.182665	0.960773
CR45479	12.9013	9.2921	11.5049	14.2722	13.8547	10.6226	8.10617	7.67779	0.280354	4.7157	2.02795	0.182786	0.960773
LysRS	19.3652	21.458	19.6252	19.8231	22.1704	22.2517	21.9564	22.8165	-0.128668	5.58616	2.02755	0.182825	0.960773
GstO2	21.892	27.131	47.8913	39.2194	24.2799	28.0587	29.146	30.2237	0.308682	5.75831	2.02749	0.182832	0.960773
CG9723	6.03228	5.63793	7.89442	6.18394	4.92274	6.13781	6.06351	5.54936	0.206301	3.39678	2.02656	0.182924	0.960773
CG4768	12.9567	13.7508	10.5406	11.3376	12.1083	15.5869	14.3115	13.7252	-0.175526	5.58163	2.02304	0.183274	0.960773
RpS28b	309.673	239.736	290.29	252.025	281.432	231.184	237.288	239.205	0.1687	7.98327	2.02206	0.183371	0.960773
mrn	1.8181	1.76035	1.94806	1.62411	1.55723	1.37589	1.74759	1.49753	0.234451	1.54344	2.02042	0.183535	0.960773
D2hgdh	161.208	163.499	164.442	154.801	151.894	159.006	137.727	148.482	0.132952	8.42152	2.01938	0.183638	0.960773
Sf3b6	30.6922	29.0119	31.6669	26.1318	31.1393	25.3894	23.0513	26.8369	0.168224	4.69017	2.0178	0.183796	0.960773
CR46050	51.468	56.1085	41.5365	46.251	56.7752	55.4632	57.7836	52.0736	-0.161252	4.41893	2.01484	0.184092	0.960773
Stt3B	25.6456	28.765	37.8188	33.0259	25.5202	28.054	27.1944	30.8281	0.19001	6.32466	2.01389	0.184187	0.960773
CG15744	1.82836	2.88219	2.10975	2.33422	2.53414	2.86532	3.09058	2.31336	-0.216928	3.96969	2.01101	0.184476	0.960773
CG4022	2.19397	2.96308	2.17354	2.84311	2.4366	3.48545	3.17485	2.93362	-0.220102	3.61922	2.00847	0.184731	0.960773
CG9682	1129.23	810.626	786.043	826.071	1068.61	721.534	533.718	628.333	0.295133	10.3893	2.00842	0.184736	0.960773
me31B	120.316	123.249	105.443	107.604	143.685	126.527	120.432	122.277	-0.143371	7.80395	2.00829	0.184749	0.960773
CG4325	4.46664	2.06997	2.37251	4.23187	3.43844	2.2535	2.07038	2.31646	0.411248	1.41418	2.0046	0.185121	0.960773
CR44206	1.81861	1.65926	1.39901	1.80918	1.60618	0.802832	1.58334	1.46959	0.318781	1.83378	2.00025	0.18556	0.960773
Pomp	28.8863	23.5921	29.5687	26.419	25.8816	21.7503	25.4552	25.576	0.161935	4.82534	1.99922	0.185664	0.960773
Cyp4d14	17.6824	12.6905	15.8551	19.7381	19.0999	14.6506	10.9276	10.5885	0.282939	4.68608	1.99802	0.185786	0.960773
CR44049	22.627	21.7746	9.41128	16.6554	24.0237	24.7629	20.342	20.5035	-0.323096	5.20948	1.99847	0.18582	0.960773
ninaD	3.55685	4.90021	1.929	7.78447	4.34564	8.03931	9.44849	5.29788	-0.555955	3.34871	2.02975	0.185838	0.960773
CG13950	4.61543	3.35411	4.24204	2.42922	2.828	2.96148	2.85635	3.45537	0.298454	2.00793	1.99749	0.185839	0.960773
Cyp4aa1	2.18726	1.8855	3.93378	2.94123	1.81484	2.33069	2.3872	2.3338	0.325382	2.40057	1.99719	0.18587	0.960773
CG2082	9.06003	8.60457	4.31231	6.35617	9.65199	8.70327	8.92759	7.79738	-0.283454	4.76623	1.99599	0.185991	0.960773
CG14710	7.93864	9.82981	11.1737	10.3708	9.43801	12.0926	11.9157	12.4072	-0.200072	3.96163	1.99548	0.186044	0.960773
CG7655	6.20156	5.74135	5.68271	4.89922	5.16012	4.93859	5.26911	4.73251	0.18852	2.4945	1.99495	0.186097	0.960773
CG1737	11.2022	12.3135	7.0315	9.57607	13.985	12.0463	11.8383	10.1563	-0.235295	5.63757	1.99478	0.186115	0.960773
shi	14.9461	19.2411	11.8978	13.9389	16.9897	19.3041	16.2597	17.3167	-0.197347	6.60287	1.99428	0.186165	0.960773
CG8270	1.2309	1.0963	1.1498	1.5598	1.33933	1.29377	1.82207	1.76019	-0.278717	1.63886	1.99373	0.18622	0.960773
CR44107	502.328	470.221	483.37	397.83	515.087	491.457	540.113	541.58	-0.147614	7.54886	1.99347	0.186248	0.960773
Cyp4ac3	10.9294	9.03234	7.85933	11.8575	11.2458	7.95394	7.4418	7.47748	0.244597	3.89511	1.99041	0.186558	0.960773
Bug22	9.34051	7.99903	10.9726	9.05724	8.14532	8.09793	8.70342	8.425	0.18709	3.07073	1.99033	0.186567	0.960773
5622121..5627594	0.243976	0.222597	0.348555	0.450748	0.14086	0.276953	0.21888	0.301437	0.450814	0.647078	1.98982	0.186619	0.960773
Fum2	1.75691	1.70865	2.67338	2.9194	1.9627	1.73869	2.12786	1.61411	0.306174	1.78851	1.98924	0.186677	0.960773
Prosap	13.9606	20.2491	11.6559	15.8973	19.7557	18.4406	17.9649	16.5011	-0.212428	7.24228	1.98769	0.186835	0.960773
CG34116	7.43023	5.83153	5.57757	5.12649	5.66305	4.47927	5.94559	4.45301	0.248231	2.16685	1.98749	0.186857	0.960773
Arpc3B	72.0516	60.5337	84.3078	65.4398	67.9157	53.3278	69.4728	61.1914	0.190252	5.71664	1.98689	0.186918	0.960773
PGRP-SC2	415.891	410.016	666.458	484.591	357.786	498.196	430.153	412.271	0.243134	8.42335	1.98575	0.187034	0.960773
CG4294	7.28033	12.8099	7.75339	9.455	9.73419	13.0109	10.5959	11.4978	-0.245583	5.59396	1.98546	0.187064	0.960773
Aldh7A1	13.7229	11.4889	14.852	14.5917	12.3653	12.581	13.9628	9.83832	0.189948	4.73419	1.98471	0.18714	0.960773
CG43051-a	331.177	241.173	303.022	295.028	298.583	245.416	263.063	248.196	0.175729	5.35702	1.98275	0.18734	0.960773
CG5447	39.565	38.9743	30.814	33.4058	45.9122	36.586	39.4003	40.962	-0.16542	5.73317	1.98252	0.187365	0.960773
CG10418	14.4074	12.0827	19.4796	14.6222	14.6586	8.60875	13.5717	13.7051	0.28667	2.61534	1.98227	0.18739	0.960773
CG4935	1.70295	1.98234	2.50712	1.10994	2.24546	2.38493	2.82113	2.03148	-0.356089	1.22161	1.98013	0.18761	0.960773
NaCP60E	0.419227	0.687001	0.57768	0.773369	0.409972	0.610908	0.502264	0.535845	0.275909	3.15153	1.97938	0.187686	0.960773
Caper	43.7793	39.4929	36.954	44.3572	40.8398	38.5658	34.7973	37.3283	0.143928	6.99344	1.97913	0.187712	0.960773
ND-B17	21.8613	15.1493	20.4544	20.9825	20.6878	14.8015	16.1847	17.373	0.210845	4.1985	1.97902	0.187723	0.960773
CG7739	38.3363	41.3238	33.6679	38.3732	42.216	43.9153	42.0482	41.0193	-0.134171	6.51579	1.97872	0.187754	0.960773
Slik	46.9052	78.2862	44.0885	55.0526	60.3184	74.7069	67.6561	65.8067	-0.239374	8.98385	1.97843	0.187784	0.960773
CR43866	60.8713	30.1837	19.4676	37.6594	36.6821	32.5036	14.6662	20.8494	0.530037	5.85978	2.02298	0.18783	0.960773
Ilk	63.3529	57.6447	44.6916	50.6417	67.7023	62.1692	60.3662	57.4523	-0.17071	7.00822	1.97663	0.187969	0.960773
mop	9.47918	16.6888	10.3041	12.1099	13.3531	16.6725	13.6126	14.3121	-0.234122	6.30982	1.9764	0.187992	0.960773
Mes2	6.45662	6.05384	5.02087	6.53737	8.19957	6.9849	7.05571	5.72634	-0.191015	4.0231	1.97622	0.188012	0.960773
CG9609	14.5641	11.8325	15.265	15.1439	13.0333	12.675	13.9153	11.9961	0.163047	4.64008	1.97445	0.188194	0.960773
id-Dmel_CG43736	9.04604	6.00245	16.4482	10.908	6.39149	7.74477	7.74665	9.21973	0.46161	0.161322	1.97328	0.188313	0.960773
CG6985	1.17637	1.05678	1.5036	0.864198	0.607646	0.703068	1.27862	0.93914	0.403373	0.880726	1.97193	0.188453	0.960773
CG14499	2317.71	3568.99	4013.23	2741.11	2942.05	3603.48	4936.91	4149.98	-0.285139	11.5805	1.96963	0.18869	0.960773
CG6287	161.269	121.9	160.314	145.725	139.205	129.07	137.428	131.175	0.159965	7.49956	1.96947	0.188707	0.960773
Cpr78E	2.26639	1.37853	1.34723	2.18631	0.832688	1.57655	1.48798	1.38595	0.463915	-0.354317	1.96883	0.188774	0.960773
Der-2	31.2034	33.3741	55.1701	40.3267	30.4886	32.9222	38.7028	34.9095	0.248204	5.6932	1.96833	0.188825	0.960773
Tmhs	1.00395	0.739829	0.623788	0.806676	0.900319	0.630703	0.34555	0.500932	0.443404	0.267749	1.96769	0.188891	0.960773
CR46096	14.7759	12.8049	14.2172	12.9482	15.2063	15.9084	15.5768	14.7999	-0.14323	4.32256	1.96681	0.188982	0.960773
CG11147	2.43471	1.95327	6.6845	3.46608	1.03749	2.0755	1.54217	4.29611	0.719705	3.16489	2.02609	0.189005	0.960773
CG14907	33.2396	36.5081	28.3757	30.228	36.4858	32.9109	37.9649	37.7597	-0.153714	5.23808	1.96609	0.189057	0.960773
CG42354	34.312	53.2859	29.267	40.1219	41.4958	55.4776	45.2985	46.0422	-0.242489	8.09688	1.96557	0.189111	0.960773
Sox21a	12.5695	16.3137	8.61125	14.4822	16.0539	16.2437	14.483	15.3373	-0.234528	5.05844	1.96456	0.189216	0.960773
CG31381	5.93292	5.61795	7.83945	5.67872	4.83511	6.03137	6.0119	5.10779	0.212056	3.33051	1.96429	0.189243	0.960773
Sema2b	0.332192	0.651069	0.333629	0.458985	0.447516	0.760393	0.596873	0.520217	-0.365437	1.44213	1.96272	0.189407	0.960773
CG42353	35.4002	54.9778	30.1981	41.3911	42.8099	57.2218	46.7342	47.4915	-0.24226	8.09635	1.96253	0.189426	0.960773
mthl15	6.43588	5.94354	5.20106	6.39134	7.49778	6.35544	6.53786	6.78801	-0.156076	4.18469	1.96244	0.189436	0.960773
grau	21.4394	17.6461	15.8082	15.8667	19.9171	20.3224	21.1131	19.5538	-0.168709	5.1684	1.96083	0.189603	0.960773
esn	0.100829	0.0726265	0.177582	0.195332	0.168278	0.25301	0.289939	0.107092	-0.566695	0.116952	1.96072	0.189615	0.960773
CR43687	1.407	2.43905	1.7859	2.72942	1.24662	0.124225	1.92181	1.75769	0.757528	-0.294501	1.96018	0.189671	0.960773
2823843..2832332	0.142324	0.170859	0.0777924	0.111778	0.227052	0.132272	0.204631	0.12957	-0.430387	0.417087	1.95943	0.189749	0.960773
CG4730	1.80743	2.30101	2.40087	2.80162	2.11692	3.34003	2.83105	3.1708	-0.278125	1.99684	1.9586	0.189836	0.960773
mldr	2.29798	2.46844	1.9071	2.22975	2.60775	2.52863	2.86848	2.30618	-0.187299	2.76702	1.95746	0.189955	0.960773
CR45054	2.70867	3.31008	1.93216	3.07024	3.44487	1.30446	1.88661	1.97192	0.385168	2.2663	1.9566	0.190043	0.960773
GlyT	0.494894	0.319263	0.369171	0.303353	0.251761	0.423704	0.230739	0.264208	0.366523	1.1211	1.9566	0.190044	0.960773
eIF3h	83.5765	80.7523	148.78	107.502	81.04	83.0421	96.7089	96.1029	0.261743	7.18654	1.95554	0.190155	0.960773
CR43898	21.3734	24.4155	11.7127	16.7222	28.5168	24.0232	21.0263	18.8374	-0.291408	4.7319	1.95445	0.190268	0.960773
Rtf1	20.7729	23.0645	14.4284	17.6229	22.0759	23.8027	21.4537	20.9383	-0.195238	6.0194	1.95319	0.1904	0.960773
Nup50	25.2785	30.5028	46.4856	38.4509	29.5788	26.7645	33.8491	30.4607	0.246066	5.96376	1.95219	0.190505	0.960773
CR44807	6.75492	6.59529	6.32622	6.47747	4.79756	5.15123	7.25571	5.97087	0.197617	3.86352	1.95216	0.190507	0.960773
zip	267.598	427.594	388.195	392.987	350.423	474.519	483.855	447.956	-0.230097	11.5141	1.95084	0.190646	0.960773
ND-15	35.2442	29.9321	34.4938	32.0234	35.0391	24.6613	32.6456	25.3608	0.188206	5.14788	1.95052	0.19068	0.960773
Spt5	30.4564	27.5948	18.346	22.9752	31.1136	31.6775	26.7766	27.4128	-0.211197	6.5478	1.95044	0.190688	0.960773
rod	0.539868	0.841832	0.702241	0.585891	0.700331	0.75831	0.896901	0.853648	-0.24322	2.26938	1.94971	0.190764	0.960773
Gem2	1.12229	1.21899	0.986678	1.2228	1.49529	1.5099	1.6613	1.07848	-0.310291	0.674215	1.94901	0.190838	0.960773
tex	4.00843	4.47596	6.69639	4.70184	4.29643	3.59188	4.39584	4.59933	0.258491	2.30498	1.94898	0.190841	0.960773
Vps37B	95.364	67.4714	61.7174	61.9294	104.98	77.1585	86.2932	74.1465	-0.231022	6.35489	1.94715	0.191034	0.960773
22843075..22844979	1.36874	1.70568	2.50392	1.89301	1.30769	1.32637	1.88685	1.60403	0.307576	1.71967	1.94589	0.191165	0.960773
CG13928	6.95701	6.28011	5.07761	6.96983	7.5087	6.71755	7.89658	6.95708	-0.176903	4.14035	1.94543	0.191214	0.960773
Egm	13.7015	12.5723	11.0455	11.9189	16.7173	12.9257	14.2033	12.4602	-0.167893	4.74742	1.9447	0.191291	0.960773
Fitm	32.0297	31.3503	36.444	33.2782	31.245	28.8632	32.3837	30.6045	0.137193	5.94654	1.9437	0.191396	0.960773
Rpb4	4.58035	3.65662	4.37053	3.46125	2.71098	3.61628	2.24031	4.40154	0.331307	1.42279	1.94338	0.19143	0.960773
Nab2	9.50301	12.9847	10.7868	11.2574	10.6729	13.4984	13.595	13.3347	-0.177071	5.38408	1.94151	0.191627	0.960773
CG4630	4.92011	3.55655	3.30195	3.67457	4.41171	3.23543	2.77808	2.67969	0.265098	2.97053	1.94107	0.191674	0.960773
Spase22-23	20.498	18.2566	21.4001	18.7671	17.8219	15.6284	17.8944	20.4554	0.160954	4.99984	1.94017	0.191768	0.960773
Sb	0.13693	0.11105	0.386233	0.105949	0.269605	0.248509	0.265141	0.328961	-0.580796	0.0335493	1.94	0.191786	0.960773
TBC1D23	18.4008	20.5693	18.2442	19.2657	21.5644	21.277	21.6142	20.4202	-0.126753	5.76838	1.94	0.191786	0.960773
dgt4	2.28161	1.60738	1.29972	1.60896	2.80134	1.78496	2.14927	1.97051	-0.327548	1.13534	1.93979	0.191808	0.960773
MED1	6.34422	7.50671	4.98845	7.16596	8.05359	7.16214	7.75041	7.02267	-0.182128	5.33744	1.93949	0.19184	0.960773
Taf8	4.83731	6.274	6.67626	6.22757	5.35188	4.85709	6.07563	4.99027	0.19785	2.93565	1.93929	0.191861	0.960773
CG9777	1.69704	1.12254	1.56657	1.22397	1.06835	0.898993	1.51867	1.01924	0.340094	0.965742	1.93842	0.191953	0.960773
l(2)k14505	7.29399	6.37986	8.79915	7.34611	7.19627	6.59957	6.1611	6.60375	0.191159	2.90614	1.93839	0.191956	0.960773
nau	2.55299	2.02629	2.44295	2.10613	2.03259	1.39274	2.56132	1.55577	0.300416	1.70091	1.9364	0.192167	0.960773
CG8298	13.9985	15.1586	9.1915	11.9289	16.4714	15.7343	14.1018	12.9492	-0.213204	5.35011	1.93634	0.192173	0.960773
CG42487	5.10844	6.68725	7.49646	6.81275	4.83342	6.19345	5.63158	6.27856	0.2083	3.4055	1.93571	0.19224	0.960773
CG4884	5.10844	6.68725	7.49646	6.81275	4.83342	6.19345	5.63158	6.27856	0.2083	3.4055	1.93571	0.19224	0.960773
6400842..6402330	0.854216	1.90944	2.51349	1.95451	0.597512	1.35755	1.77027	1.39548	0.514265	1.23557	1.9357	0.192241	0.960773
CG30283	1.9342	1.48236	0.982027	1.3854	1.94824	1.70771	2.1864	1.70999	-0.354986	0.521526	1.93559	0.192253	0.960773
CG33051	42.1912	23.04	43.9897	30.1814	32.9975	26.1615	31.2452	27.1144	0.273585	4.53487	1.93151	0.192685	0.960773
CG31038	4.33174	5.09524	2.94403	4.31431	5.45445	4.87693	4.2716	5.09849	-0.216052	4.83504	1.93138	0.192699	0.960773
CG2841	20.9643	36.519	19.0734	27.8876	26.8326	36.8649	32.1433	31.314	-0.264511	7.35222	1.93065	0.192777	0.960773
Bem46	10.5436	11.3333	12.8959	11.5064	10.9261	10.1627	10.8955	10.6145	0.143442	4.25263	1.92828	0.193029	0.960773
Appl	2.53569	2.46803	2.19014	2.40359	2.87133	2.55985	2.94235	2.46542	-0.15085	4.03204	1.92494	0.193385	0.960773
CG5199	3.32884	3.6022	3.37219	2.84949	2.76168	2.734	2.73467	3.38487	0.202683	2.36407	1.92475	0.193405	0.960773
PGRP-LB	69.4723	85.5646	111.565	87.0582	72.0444	79.5901	82.5035	80.188	0.193421	7.21312	1.92282	0.193611	0.960773
CrebB	33.9244	37.6196	22.6543	28.8024	38.0933	39.2654	32.8082	33.9704	-0.205858	7.38078	1.92242	0.193654	0.960773
Jon65Ai	1080.47	983.963	1208.76	1101.21	911.93	1075.73	1116.23	813.628	0.183593	9.94644	1.92186	0.193714	0.960773
Usp5	26.0456	27.8709	19.3102	23.9879	30.8652	27.061	26.8695	26.4163	-0.170152	6.187	1.92119	0.193786	0.960773
CR44975	2.13002	2.08219	3.0723	2.34601	3.19269	3.29106	2.86639	2.9241	-0.329671	0.269288	1.92024	0.193887	0.960773
CG6574	8.00627	6.43229	6.60158	6.41694	7.64842	5.58062	5.70983	5.43544	0.198276	3.67518	1.92009	0.193904	0.960773
mTerf5	2.73601	3.49768	2.90013	3.3548	3.45671	3.55324	3.56628	3.79094	-0.178834	2.7592	1.91981	0.193934	0.960773
Brf	13.9591	16.8123	11.1988	12.9936	15.9398	17.0431	15.4551	14.6673	-0.176531	5.45708	1.9191	0.194009	0.960773
Rbp1	27.0534	21.645	20.003	22.0066	31.8691	24.0326	27.6013	22.1977	-0.194328	5.23055	1.91801	0.194127	0.960773
rdgB	1.78846	1.80054	0.984412	1.49628	1.88209	1.96018	1.94291	1.55731	-0.25023	3.96461	1.91771	0.194159	0.960773
RpL36	867.405	681.44	887.349	886.745	851.003	660.412	771.767	710.959	0.176703	9.08246	1.91714	0.19422	0.960773
Kaz-m1	87.3751	52.3915	60.3214	61.7451	71.9931	50.3041	51.2639	52.1886	0.242022	6.70138	1.91588	0.194355	0.960773
porin	234.125	216.361	293.665	241.533	224.177	207.437	227.766	233.881	0.167031	9.39205	1.91515	0.194434	0.960773
Sf3b2	24.1093	31.1737	34.6278	30.1482	27.3693	37.6353	37.7546	37.4105	-0.201668	6.44878	1.91504	0.194445	0.960773
topi	1.63068	1.98007	2.00617	2.31405	1.80041	2.17019	2.71074	2.94968	-0.257982	2.55658	1.91441	0.194514	0.960773
Pxn	0.400481	0.584622	0.585348	0.600261	0.562752	0.46202	0.422521	0.379715	0.271971	1.60126	1.91336	0.194626	0.960773
l(3)05822	13.0489	14.8469	9.98615	13.5545	14.9248	15.2738	13.9038	14.7808	-0.172052	5.60627	1.91242	0.194728	0.960773
1194940..1195380	13.1952	9.53905	10.5667	10.5444	11.0287	10.1222	8.8299	8.03762	0.23112	2.19377	1.91154	0.194822	0.960773
Mgstl	13.0365	12.1639	18.3926	14.7604	11.5568	12.1744	15.7238	11.2619	0.22605	4.01801	1.9112	0.194859	0.960773
CG4610	3.54492	4.28474	6.60772	4.73218	4.25279	3.74509	4.01	4.36734	0.250352	3.23035	1.90922	0.195073	0.960773
lft	1.01774	1.0871	1.43217	1.08654	0.972345	0.613657	0.795025	1.2404	0.375036	0.460193	1.90879	0.195119	0.960773
CG32706	16.2638	10.5135	13.4229	10.3751	13.1958	9.85193	10.7861	9.74174	0.241726	3.36852	1.90828	0.195174	0.960773
RanBPM	63.097	83.2537	51.2471	67.7663	74.4307	88.7156	71.8769	74.1948	-0.199155	8.32108	1.90785	0.195221	0.960773
CG14100	5.84375	5.41499	7.37529	5.38197	5.70563	4.95793	4.60165	5.87884	0.207812	2.98622	1.90722	0.195288	0.960773
Zif	55.9354	48.8701	46.5977	45.3097	56.8661	54.7783	60.3029	50.0608	-0.149815	6.30977	1.90722	0.195289	0.960773
16547765..16548142	4.12199	6.98434	10.6776	5.60695	2.82443	4.67913	5.07153	7.35627	0.4755	1.19477	1.90698	0.195314	0.960773
TBC1d7	6.92473	7.71255	8.97927	8.01775	7.23593	6.29791	8.00657	6.87696	0.17842	3.37395	1.90657	0.195359	0.960773
Prx3	9.50507	9.87031	19.3382	11.8197	9.09816	8.17123	11.899	11.8381	0.324348	3.54878	1.90631	0.195387	0.960773
wun	47.0048	58.476	47.4591	52.606	53.3436	59.1875	58.8225	58.914	-0.141616	6.89243	1.90623	0.195395	0.960773
CG10055	56.1129	52.9688	46.6302	49.4743	66.3904	54.9209	55.9499	53.7709	-0.146117	7.04462	1.90555	0.195469	0.960773
25258153..25258888	3.62914	2.71986	1.84458	3.0086	5.11736	3.31862	3.54073	2.69863	-0.359292	1.28962	1.90511	0.195517	0.960773
CG2076	68.8854	63.8222	82.1942	63.903	62.038	57.9007	67.3206	66.6676	0.15945	6.63554	1.90382	0.195657	0.960773
CR43418	42.4127	30.3306	15.5316	19.4562	21.7369	23.1298	14.211	23.7857	0.404022	4.07538	1.91285	0.195676	0.960773
UQCR-C1	127.427	118.021	153.109	153.301	133.581	112.746	125.762	129.417	0.163249	7.74871	1.90352	0.195689	0.960773
Ppat-Dpck	25.8883	23.9589	33.5397	28.176	23.2607	25.269	27.3277	24.6633	0.174574	5.50656	1.90168	0.195889	0.960773
rho-7	29.3713	27.1951	29.0808	26.784	26.8901	22.3243	28.1952	25.9125	0.146639	5.37228	1.90103	0.19596	0.960773
NUCB1	191.612	321.58	278.613	274.475	220.573	371.153	349.777	360.51	-0.268635	9.34845	1.90102	0.19596	0.960773
Dcr-1	1.73871	2.35855	2.06469	2.31541	2.37664	2.24176	2.61711	2.44879	-0.169074	3.97675	1.89964	0.19611	0.960773
CG6923	3.05375	4.76831	3.18478	3.87197	3.89256	4.90066	4.20252	4.41651	-0.205483	4.39357	1.89876	0.196207	0.960773
spartin	11.6726	11.6332	11.7343	11.3157	12.8309	13.8245	11.5834	13.5339	-0.135664	4.78425	1.89854	0.19623	0.960773
Ca-alpha1T	1.43019	2.04673	1.71732	1.67555	1.65887	1.86952	1.24009	1.19762	0.226301	4.40192	1.89851	0.196233	0.960773
Atx2	27.3577	41.7398	28.4542	30.8738	36.2647	39.5563	36.2331	35.8985	-0.182874	7.67349	1.8984	0.196246	0.960773
CG5009	8.14623	7.17772	6.32521	7.93987	9.18334	10.4748	7.19559	7.6575	-0.197371	4.33156	1.89579	0.196529	0.960773
GramD1B	40.0447	53.7424	29.8709	35.7595	41.7157	52.8817	49.0817	45.7409	-0.228168	8.27733	1.89534	0.196578	0.960773
maf-S	624.741	459.564	680.11	541.487	529.961	476.228	548.812	510.952	0.184644	8.46555	1.89516	0.196599	0.960773
CG5171	1.98509	1.92853	1.99367	1.97479	1.79996	1.75265	1.55829	1.83694	0.205762	1.70822	1.89513	0.196602	0.960773
AOX1	355.729	370.032	420.727	497.071	445.381	309.334	372.353	320.124	0.209421	10.6739	1.89474	0.196644	0.960773
CG5059	306.051	292.171	170.905	204.422	330.723	332.588	270.573	251.164	-0.259722	9.29567	1.89456	0.196664	0.960773
Tao	35.7054	41.6708	27.3434	32.4908	37.6926	42.9112	38.7936	38.1899	-0.177628	8.0929	1.89118	0.197033	0.960773
CG6834	12.9793	20.4671	26.6736	29.2218	14.8488	21.2263	15.2363	21.1124	0.324513	5.86984	1.8943	0.19712	0.960773
id-Dmel_CG44328	0.42052	0.620181	0.744477	0.515759	0.515765	0.671354	0.982178	0.763921	-0.33003	1.87623	1.88983	0.197181	0.960773
CR44981	2.36795	2.16046	1.33831	1.82684	2.68171	2.58135	2.00298	2.29873	-0.286757	1.53816	1.88948	0.197219	0.960773
CG31251	2.45986	1.20427	2.49229	2.56647	1.67867	1.35077	1.92156	1.9026	0.371682	1.08418	1.88867	0.197308	0.960773
Grip128	1.27777	1.33235	1.10582	0.998753	1.396	1.59553	1.50456	1.12264	-0.229048	2.18994	1.88836	0.197342	0.960773
CG8389	1.9942	2.10375	2.42696	2.7898	2.33939	2.91615	2.94988	2.81464	-0.219972	2.39219	1.8878	0.197403	0.960773
Galphaq	10.6255	13.196	5.81445	8.02962	13.8197	12.2944	10.447	10.3964	-0.295175	6.19	1.88605	0.197595	0.960773
cnk	6.61551	9.792	7.12266	7.81041	8.59202	9.71226	8.85324	8.75829	-0.174913	5.61202	1.88509	0.1977	0.960773
CG7970	19.0392	19.4092	19.8498	20.2739	20.2109	18.2344	16.9527	17.5088	0.132523	4.60397	1.88436	0.197781	0.960773
CG7408	16.3253	14.9039	18.6064	17.0087	14.4308	15.3256	16.7575	14.7147	0.150867	5.66858	1.88325	0.197903	0.960773
Naa15-16	26.1881	26.0116	26.3876	28.0939	25.4663	23.5484	24.4974	26.0948	0.123154	6.69451	1.88229	0.198009	0.960773
Rab3	5.13748	5.33596	4.30695	4.81613	3.89947	4.54338	4.94312	4.40825	0.162171	4.13997	1.88193	0.198048	0.960773
CG14757	3.95864	2.23772	3.02871	2.3115	2.72888	2.24142	2.18877	2.19149	0.327981	0.991499	1.88092	0.198159	0.960773
Urod	19.6077	16.6165	24.9133	21.1619	18.0131	18.6733	17.6632	19.5009	0.180749	4.66886	1.87911	0.198359	0.960773
Plap	14.7623	13.1854	12.4013	12.1921	16.654	14.0717	14.8463	13.717	-0.149062	5.32606	1.8779	0.198493	0.960773
slo	2.64646	2.72602	2.54058	1.90366	2.49742	2.17619	1.84095	2.23616	0.190376	4.5624	1.87664	0.198632	0.960773
Abp1	81.4924	101.24	76.569	76.9573	94.4856	93.7024	101.507	89.8615	-0.15219	7.80444	1.87592	0.198712	0.960773
CG10184	13.1974	13.7425	14.8424	14.1517	9.90037	12.5176	13.5355	14.1986	0.179824	4.14665	1.87414	0.198908	0.960773
CG3165	15.4064	15.6572	15.1982	13.318	15.5568	16.4672	19.1088	16.1445	-0.15182	4.39475	1.87414	0.198909	0.960773
CG11456	1.47899	1.17268	1.38154	1.33119	1.90485	1.61671	1.45954	1.47201	-0.241387	1.44823	1.87371	0.198956	0.960773
CG5880	0.87518	1.25477	1.63503	1.24377	0.932839	0.846291	0.942188	1.28154	0.343933	0.827471	1.8729	0.199046	0.960773
Golgin245	41.3114	67.3539	47.0992	54.0951	51.8464	69.8225	58.8941	66.3247	-0.214327	8.1801	1.87246	0.199095	0.960773
mRpS18B	6.55861	4.40389	8.16325	5.71818	3.78009	5.07493	6.45584	5.0633	0.308194	2.30432	1.87106	0.19925	0.960773
CG9643	26.8727	21.0815	23.1937	21.9775	24.4548	18.7378	21.6977	19.2111	0.173142	4.28676	1.86896	0.199483	0.960773
CG17633	552.794	544.22	656.245	555.058	536.783	566.737	524.745	488.23	0.149766	9.54531	1.86882	0.199499	0.960773
Amacr	7.88405	9.1056	12.1757	11.6581	8.75256	8.58016	9.98458	8.5376	0.210527	3.68475	1.86881	0.199501	0.960773
AdipoR	86.3783	76.4076	77.7255	78.3793	77.2563	70.1725	76.584	72.7925	0.128349	7.80266	1.86842	0.199543	0.960773
CR46262	21.8126	18.2213	15.1181	20.7131	19.8811	13.6935	15.8775	16.9458	0.218731	3.00854	1.86782	0.199611	0.960773
CG7778	12.2198	14.816	22.3187	16.8162	16.3993	16.3987	27.1978	22.3213	-0.292242	5.32167	1.86704	0.199698	0.960773
CG5177	21.8029	28.4435	41.5604	29.8868	20.4136	30.9998	24.5925	26.7202	0.266335	4.9817	1.86653	0.199754	0.960773
CG3597	0.931436	0.755394	0.835947	1.15826	0.772179	0.662465	0.779918	0.745895	0.33827	0.110761	1.8664	0.199768	0.960773
CR45831	31.2927	29.1167	40.5363	33.8732	28.0923	30.7119	32.9188	29.9828	0.17178	5.47505	1.86611	0.199801	0.960773
MED27	2.00211	1.98785	2.1064	2.43107	1.75742	1.87165	2.08012	1.52784	0.25967	1.13002	1.86528	0.199894	0.960773
Cyp12e1	10.0044	10.2732	12.3137	11.2404	10.1355	10.0799	10.1632	9.87772	0.146604	4.09628	1.86521	0.199901	0.960773
Fur1	21.1349	28.8148	17.0879	20.9802	26.1346	26.9552	24.6048	24.5211	-0.194015	7.76036	1.86343	0.2001	0.960773
Sin3A	18.6887	25.7414	14.5195	20.9019	23.1088	27.0705	20.8573	23.2395	-0.218294	7.67842	1.86306	0.200141	0.960773
CG6733	1.23153	0.449448	0.682115	1.6662	1.19453	0.956848	1.43852	2.6036	-0.591621	0.776159	1.86292	0.200156	0.960773
CG8814	165.582	160.077	120.539	134.1	166.376	169.66	165.71	157.492	-0.160376	8.11093	1.86243	0.200212	0.960773
Sur	2.08174	1.89541	2.29791	1.79282	1.81317	1.97469	1.62876	1.88061	0.168734	3.83467	1.86096	0.200376	0.960773
Ldsdh1	116.956	105.178	117.237	108.959	110.895	108.18	99.6538	98.0038	0.130448	7.24743	1.86062	0.200414	0.960773
CG34132	8.4399	6.12774	5.62383	5.67625	9.92246	6.61201	8.06231	7.13945	-0.267252	1.96825	1.86042	0.200437	0.960773
Chi	15.262	13.6922	17.1208	16.2814	15.6733	12.8124	14.8968	13.6322	0.154536	5.06982	1.85967	0.20052	0.960773
Cog7	12.1214	9.8442	10.7881	13.14	13.2314	11.9258	16.3977	11.7918	-0.192078	4.86203	1.85954	0.200535	0.960773
SNRPG	67.744	51.2963	63.9643	66.3447	57.7166	47.4307	63.5044	55.6096	0.178507	4.84181	1.85906	0.200589	0.960773
Naa20A	24.9879	26.1938	30.7325	31.8347	24.3202	24.2749	25.7564	28.9511	0.162547	5.09413	1.85723	0.200794	0.960773
Xxylt	0.892445	1.16826	1.29844	0.733413	0.542828	0.565264	1.04171	0.969466	0.412415	0.617222	1.85553	0.200984	0.960773
dx	10.9151	11.5274	5.02264	8.65204	13.4492	10.7371	10.0237	10.9839	-0.299129	5.28191	1.8546	0.201089	0.960773
Prp38	27.3847	19.8668	36.6921	24.8358	21.8208	22.2298	26.6979	23.0454	0.23899	4.92535	1.85373	0.201186	0.960773
HDAC6	23.3142	17.122	19.9357	25.1753	23.715	18.4349	16.1263	17.0155	0.211271	6.72362	1.85354	0.201208	0.960773
PlexB	1.49294	2.95057	2.07662	2.13132	1.98551	3.43269	2.545	2.74795	-0.288633	4.09708	1.85325	0.20124	0.960773
Asph	8.72022	11.0199	11.9688	10.8666	11.2291	15.3307	11.7451	11.1069	-0.192317	5.58014	1.85312	0.201255	0.960773
Ady43A	2.15067	1.81736	2.03197	1.92413	1.88466	1.70768	1.90355	1.49802	0.204657	2.05965	1.85157	0.20143	0.960773
CG14642	1.10192	0.656563	0.986067	0.827744	0.922833	0.575791	0.593143	0.713137	0.372768	0.243794	1.85121	0.20147	0.960773
CG13690	3.4172	2.18957	2.04681	2.15386	2.57883	1.9346	1.81836	1.7547	0.305528	1.47946	1.85095	0.201499	0.960773
CG10560	0.860668	0.318345	0.268413	0.995047	0.997951	0.41075	0.679273	2.14591	-0.757091	0.267794	1.85107	0.201535	0.960773
mir-13b-2	44.0632	26.5251	14.1527	24.8547	27.5382	14.0374	23.1072	15.7149	0.478058	0.787254	1.85058	0.201541	0.960773
CG46313	3.82725	4.52253	4.24119	4.02544	5.1262	4.30202	4.63759	4.81197	-0.159988	3.07441	1.84855	0.20177	0.960773
Wnt6	3.76455	4.34924	6.56731	4.8087	3.61487	4.11043	4.00782	4.96615	0.245237	3.69849	1.84731	0.20191	0.960773
CG16743	0.878924	0.973745	2.60793	1.62382	1.698	2.38345	2.24727	2.11153	-0.457445	0.923417	1.84714	0.201929	0.960773
CG5191	2.40997	2.32967	3.47609	2.84461	2.43496	2.2291	2.21613	2.79377	0.216781	3.11756	1.84641	0.202011	0.960773
4206126..4211643	3.73418	5.85179	4.66132	5.7614	4.47159	6.15122	6.60632	6.63966	-0.233928	4.92175	1.8447	0.202205	0.960773
CG10466	9.42169	8.50267	15.9531	9.16906	9.26467	9.40347	8.97165	8.46341	0.276304	2.63272	1.8443	0.20225	0.960773
CG2691	14.4264	14.4644	20.4329	18.6389	16.4758	14.0096	15.2504	15.2145	0.182249	6.19651	1.84368	0.202321	0.960773
Ir21a	0.37495	0.441413	0.20935	0.276746	0.383538	0.363082	0.47853	0.534657	-0.401244	0.100333	1.8436	0.20233	0.960773
ced-6	2.43064	2.43846	2.06408	2.34475	2.74779	2.34111	2.14097	4.20637	-0.277404	2.97892	1.84281	0.202419	0.960773
Ntf-2	26.2636	24.461	37.175	27.0875	25.0762	22.1552	28.2078	26.5269	0.198379	6.65997	1.84184	0.20253	0.960773
CG4733	2.6824	3.31858	4.8482	3.17801	2.63937	3.61761	2.4941	3.10323	0.264472	3.57492	1.84183	0.20253	0.960773
Neurochondrin	12.0537	11.571	12.0885	11.0471	12.1615	12.3834	8.6146	8.38536	0.195621	4.83523	1.84132	0.202588	0.960773
CG15528	2.64985	1.40561	1.06663	1.65523	1.78169	0.734515	1.13197	1.36203	0.467112	0.661214	1.83975	0.202767	0.960773
Rpb12	19.187	14.4648	15.3837	13.9796	15.2063	13.0432	14.001	13.4173	0.204269	2.40579	1.83919	0.20283	0.960773
CG15877	19.6162	20.7472	32.9796	24.0201	17.9454	21.4836	20.3615	24.2534	0.235123	4.53402	1.83893	0.202859	0.960773
CG17568	2.07492	1.41983	1.67598	1.2385	1.7094	2.25942	1.72653	2.22654	-0.282099	1.74758	1.83893	0.20286	0.960773
Tm1	81.2534	108.141	86.6441	93.1509	95.8392	115.819	103.042	104.742	-0.162368	9.9156	1.83893	0.20286	0.960773
rut	3.61689	3.79163	3.38767	4.89398	4.47099	4.40475	4.30402	4.78145	-0.171358	5.3398	1.83769	0.203001	0.960773
btsz	5.66209	6.69995	3.45992	5.39848	6.76476	6.63297	5.82231	6.05798	-0.229802	6.64951	1.83707	0.203071	0.960773
CG5500	11.8457	10.0647	14.1813	11.5633	12.0836	9.41274	9.24067	11.4188	0.20198	3.27869	1.83654	0.203132	0.960773
dos	5.39056	5.35967	4.08913	4.8338	5.82198	5.61977	5.85465	5.00985	-0.156954	4.61661	1.83653	0.203133	0.960773
CG7381	259.563	445.661	459.421	277.182	268.332	504.953	665.698	457.672	-0.376144	10.5121	1.8424	0.203199	0.960773
jbug	1.54816	1.74338	1.5051	2.50422	2.0834	1.81892	2.75021	2.16129	-0.248	4.39678	1.83585	0.20321	0.960773
Sirup	23.619	12.4508	14.7879	18.4926	15.175	11.0059	16.8103	15.1313	0.2819	3.54339	1.8358	0.203216	0.960773
Cyp9c1	30.6124	29.6277	44.9652	36.0434	29.4353	30.9902	34.6968	30.364	0.19509	5.86371	1.83092	0.203772	0.960773
CR43959	2.13548	1.49463	0.573841	1.45507	1.14588	1.21391	1.12981	0.421667	0.560361	0.450579	1.8287	0.204027	0.960773
CG5435	3.14901	2.37341	6.3984	4.39256	3.06461	2.84072	3.45	3.38789	0.377314	1.77692	1.82815	0.204089	0.960773
CG42399	0.317682	0.333595	0.401158	0.256405	0.257154	0.232854	0.242792	0.33408	0.316664	0.707052	1.82813	0.204092	0.960773
oys	52.6441	75.94	63.114	60.6661	60.2882	78.8125	79.4088	72.3417	-0.183746	8.36743	1.82808	0.204098	0.960773
CG34376	39.3018	39.4739	43.1328	41.7233	36.0629	40.5209	38.0095	37.8205	0.126192	7.09537	1.8277	0.204142	0.960773
CG12118	10.0848	8.40594	8.84978	10.2802	9.24298	8.85994	7.57639	8.42287	0.166649	3.52542	1.82717	0.204202	0.960773
PlexA	6.56695	8.66475	5.75928	6.8041	7.45185	8.70493	7.59991	8.07536	-0.173997	6.30564	1.82692	0.204231	0.960773
Rap1	136.124	179.369	108.943	131.354	153.422	177.583	162.14	152.46	-0.194733	8.81976	1.82679	0.204245	0.960773
CR43787	27.3347	26.4555	40.1508	32.2004	26.2837	27.6721	31.0125	27.1129	0.194879	5.86399	1.82497	0.204455	0.960773
mRpL41	9.63582	7.27739	8.27734	7.02961	9.28638	5.48262	6.80767	5.65867	0.269453	2.16131	1.82469	0.204487	0.960773
TpnC25D	28.1605	25.2519	33.6687	24.3956	24.4844	26.9293	25.6404	23.8343	0.168347	5.05609	1.82306	0.204674	0.960773
Dbp45A	11.7292	13.5505	22.7183	17.1994	11.8981	14.1551	14.098	15.2235	0.258417	4.65847	1.82263	0.204724	0.960773
Der-1	10.5397	9.70952	12.0437	10.7395	10.5933	8.17625	8.72345	11.0624	0.183356	3.67128	1.82051	0.204968	0.960773
CG5828	17.8464	18.5016	16.0421	18.3751	21.1504	19.8482	19.6286	18.2236	-0.131864	5.17901	1.82034	0.204988	0.960773
Trpml	0.217512	0.359104	0.155374	0.350336	0.183542	0.182898	0.165868	0.268741	0.463558	-0.347478	1.81998	0.205028	0.960773
CG8132	12.1958	10.6657	15.583	14.0855	12.9556	10.7152	12.7773	10.0046	0.202501	3.73232	1.81952	0.205082	0.960773
cv-c	13.4198	21.0336	9.51889	15.512	19.6019	18.5104	17.1559	17.0035	-0.259766	7.32622	1.8191	0.205131	0.960773
CG8664	2.38841	1.55124	1.96189	2.29547	2.60509	1.6441	0.9152	1.08923	0.417715	1.53421	1.81758	0.205306	0.960773
CR43730	40.6964	37.9604	52.9513	63.5314	42.0944	45.2371	36.4127	45.9952	0.225637	6.03304	1.81712	0.205359	0.960773
CG6403	9.93428	9.14125	11.9531	8.36233	9.81951	6.70946	8.5982	9.22008	0.222508	2.79951	1.81703	0.205369	0.960773
CG11964	16.8691	15.6833	19.6794	17.5367	14.7575	15.6683	17.3843	16.1133	0.150181	4.98116	1.81677	0.205399	0.960773
zetaCOP	59.2944	46.698	58.0136	55.3259	50.9502	46.1278	52.9256	51.1024	0.150463	6.0134	1.81558	0.205537	0.960773
CG6310	4.56235	4.49894	7.01936	5.04298	4.08314	3.29574	6.07757	3.76425	0.317066	1.74968	1.81524	0.205576	0.960773
mtRNApol	5.11548	5.51582	3.55411	5.09565	4.43779	5.02228	3.49185	3.96371	0.21232	4.42047	1.81443	0.20567	0.960773
moody	12.2139	22.0959	15.2767	19.4265	16.4507	23.9053	22.5318	20.1618	-0.247319	6.22608	1.81347	0.205781	0.960773
CG5783	1.93525	1.40036	2.00209	1.42731	1.18253	1.59081	1.44583	1.28255	0.318326	0.603787	1.81289	0.205848	0.960773
Ric	31.1018	31.8457	27.7722	28.6681	31.696	32.2928	36.1596	32.8188	-0.132	6.17094	1.81273	0.205867	0.960773
CG42514	20.1972	15.0843	12.7574	15.1986	17.8554	13.2986	12.0866	11.6964	0.230016	5.21412	1.81267	0.205874	0.960773
CG12290	13.8961	10.2418	7.13572	9.85298	9.52365	8.66895	9.33658	7.99432	0.236756	5.41815	1.81256	0.205886	0.960773
19703592..19712669	0.154122	0.1534	0.113172	0.209076	0.22868	0.167001	0.178178	0.235622	-0.333479	0.762779	1.81133	0.206029	0.960773
CG15546	2.37352	1.40123	2.05411	3.54181	1.85557	2.38836	5.32657	3.7064	-0.478942	2.38471	1.8159	0.206188	0.960773
crim	6.80786	4.78387	12.003	9.04408	6.7437	5.56269	7.3291	6.58272	0.339397	2.48268	1.80989	0.206197	0.960773
Myo10A	0.143742	0.183606	0.105048	0.204962	0.268122	0.186136	0.157972	0.207196	-0.333783	1.31071	1.80932	0.206262	0.960773
CG11247	7.60223	11.5196	8.1823	10.3933	9.28774	12.168	11.0769	11.3854	-0.19927	4.86936	1.80887	0.206314	0.960773
CG10163	14.7523	7.18163	3.90981	8.86768	9.69914	5.36183	5.57336	4.33306	0.506485	3.19763	1.83035	0.206317	0.960773
CG30484	0.0679864	0.354452	0.481906	0.212563	0.19928	0.480204	0.420853	0.727988	-0.698371	0.340297	1.80849	0.206359	0.960773
scrib	20.4672	32.1126	18.1039	27.7759	31.3965	30.3685	27.7504	27.1754	-0.223588	8.8509	1.80682	0.206554	0.960773
fok	182.428	236.743	158.03	203.612	232.165	264.896	175.862	243.35	-0.208866	8.92711	1.80662	0.206576	0.960773
Phs	3.58987	3.62301	2.16353	3.32104	4.10158	4.09144	4.01346	2.99562	-0.234956	3.86808	1.80564	0.206691	0.960773
galene	2.73717	2.61438	2.67726	2.91443	3.01152	3.14355	3.55537	2.77416	-0.1661	3.1325	1.80495	0.206771	0.960773
cora	89.1539	129.106	87.6651	107.29	115.402	123.644	116.534	118.253	-0.176033	9.38657	1.80392	0.206891	0.960773
Hmg-2	8.99414	9.73524	11.8493	8.90052	10.3038	10.7339	12.5641	11.7509	-0.177079	3.84204	1.80371	0.206916	0.960773
mRpL9	14.7377	9.13472	16.1741	13.5457	12.8487	10.0419	11.8457	11.4684	0.239916	3.31766	1.80309	0.206988	0.960773
Sirt4	6.67432	4.63078	6.20808	4.51903	5.44373	4.75008	5.02018	3.75559	0.241338	2.69689	1.80219	0.207093	0.960773
CG10283	7.16138	12.382	9.60065	11.1329	9.93094	13.254	12.0366	12.3893	-0.220737	5.06599	1.80091	0.207242	0.960773
Sld5	13.1635	10.734	13.2908	12.1131	11.8933	10.1331	11.935	10.5941	0.171017	3.19094	1.80063	0.207275	0.960773
CG42375	45.8327	36.57	37.7104	36.7591	40.25	30.7641	37.1673	34.332	0.164373	5.38822	1.80003	0.207346	0.960773
CG9288	45.8327	36.57	37.7104	36.7591	40.25	30.7641	37.1673	34.332	0.164373	5.38822	1.80003	0.207346	0.960773
5612538..5614340	1.6049	1.239	1.22103	1.14041	1.38167	0.965412	1.17954	0.728754	0.316822	1.1324	1.79911	0.207453	0.960773
CG3918	28.0872	33.0074	38.7418	35.29	36.2669	42.2364	36.9617	37.9932	-0.160295	6.02812	1.799	0.207466	0.960773
CG42397	7014.8	4424.2	4715.19	6087.19	6898.99	3862.46	3432.07	4176.8	0.305122	11.6911	1.79849	0.207526	0.960773
CG1951	4.61587	6.96501	4.57513	5.28856	5.5192	6.77487	5.77891	6.99471	-0.203799	4.23214	1.79812	0.20757	0.960773
CR45018	70.2979	78.1072	84.3551	70.0597	68.3508	86.4774	98.9971	94.8026	-0.180913	8.34775	1.79774	0.207614	0.960773
Art3	5.64048	6.30413	7.72893	6.4529	5.62224	5.4002	5.82803	6.60597	0.178672	3.49105	1.79659	0.207749	0.960773
CG17565	35.9123	31.3602	39.8492	33.3873	33.4557	29.8105	35.3565	29.8752	0.154118	5.72387	1.79628	0.207785	0.960773
CG5945	0.766222	0.806632	4.38673	2.11084	0.137426	1.09281	0.499692	2.20893	1.04415	0.730767	1.82855	0.207794	0.960773
CG6379	7.12341	7.07267	4.83514	5.60853	8.11801	7.17215	6.82683	6.46095	-0.189067	4.47602	1.79526	0.207905	0.960773
l(3)02640	5.21262	5.76605	4.27787	5.45785	6.39309	5.7885	5.73058	5.61882	-0.159584	3.82669	1.79503	0.207932	0.960773
Cyp4s3	2.69618	6.44145	5.96567	2.93105	2.92936	7.27638	9.55692	6.43723	-0.521621	3.66746	1.82408	0.207969	0.960773
CG9932	5.28674	6.36791	5.83942	6.93625	5.79419	5.32292	4.7171	6.29271	0.166248	5.71235	1.79391	0.208063	0.960773
CG1941	7.63762	8.52073	10.0129	9.44107	8.6219	7.8783	7.44391	8.42947	0.161432	3.84357	1.79363	0.208096	0.960773
[truncated: 8,014 more rows]
