# Supplementary material for: Quercetin Prevents Intestinal Stem Cell Aging via Scavenging ROS and Inhibiting Insulin Signaling in Drosophila
Source: Antioxidants (Basel). 2022 Dec 27;12(1):59. doi: 10.3390/antiox12010059 (PMC9854609; doi:10.3390/antiox12010059)
Supplement: Supplementary file 1 [file antioxidants-12-00059-s001.zip › Supplementary Files/Table S5.xlsx]

## Sheet: Sheet1
Table S5 (related to Figure 5). List of the top 30 genes upregulated (pink color) and the top 30 genes downregulated (grey color) in Que-treated 40-day-old flies compared to the control group from RNA-seq
Geneid	Que1	Que2	Que3	Que4	DMSO1	DMSO2	DMSO3	DMSO4	logFC	logCPM	F	PValue	FDR
CR42652	22.3332	44.6336	27.243	41.6839	22.0192	13.521	13.4241	20.4394	0.992898	2.95141	15.9431	0.00220624	0.960773
CR32864	100.393	204.15	137.442	188.953	113.468	70.7973	66.319	91.3639	0.906781	5.18725	15.5477	0.00241343	0.960773
CG32454	0.831778	0.869565	0.779832	0.655075	0.452524	0.489588	0.326471	0.399653	0.930292	0.214274	14.4036	0.00308682	0.960773
CG9394	55.9769	41.3093	60.1484	47.6004	37.0065	41.0193	33.1408	34.0196	0.52371	6.66521	14.3949	0.00309288	0.960773
14030806..14035334	4.97088	2.90823	3.43507	4.00916	2.61925	2.50435	2.62566	2.48287	0.608698	3.86372	14.1245	0.00328848	0.960773
Rad1	0.72853	0.410545	0.717029	0.532905	0.279778	0.264857	0.262398	0.267681	1.16521	-0.522099	14.062	0.00333569	0.960773
Sws1	0.72853	0.410545	0.717029	0.532905	0.279778	0.264857	0.262398	0.267681	1.16521	-0.522099	14.062	0.00333569	0.960773
CR44962	3.22887	2.72219	2.68824	2.80552	1.71535	1.47952	1.61704	2.04236	0.763437	0.878	13.8832	0.00347546	0.960773
Karl	1.16477	1.0202	0.887061	0.880632	0.564886	0.678731	0.548603	0.671579	0.704742	1.17027	13.1682	0.004109	0.960773
CG14618	9.3555	8.43981	10.5528	8.67953	7.25482	6.96069	6.88193	6.81847	0.431674	3.30598	13.0104	0.00426682	0.960773
rha	1.62402	0.866026	1.64293	1.95495	0.885269	0.929716	0.887156	0.869387	0.793746	2.39012	12.2594	0.00512473	0.960773
GLaz	5.3913	4.4652	5.52646	6.09233	3.9542	3.14253	3.50077	4.32574	0.54985	2.48294	11.8903	0.00562118	0.960773
Vha68-1	5.64219	5.93892	7.12734	6.62916	4.9963	4.89762	4.52047	5.18222	0.394403	3.91722	11.4915	0.00622371	0.960773
LysE	539.254	487.95	460.422	633.537	468.624	407.375	329.181	298.351	0.522426	8.03964	11.1173	0.00686021	0.960773
CG6839	45.6454	38.9306	44.3628	33.9013	26.3663	35.2577	21.6119	30.6721	0.539442	5.52316	10.9215	0.00722425	0.960773
CG30340	4.31031	3.01422	2.76978	4.08254	2.74419	1.52679	2.06661	2.33145	0.73708	1.83988	10.8057	0.00745036	0.960773
PGRP-SC1a	63.8668	59.2079	96.9095	61.5449	45.9474	58.1549	42.6892	45.6274	0.57324	5.12778	10.6401	0.00778869	0.960773
CG14817	45.4852	30.3048	48.6569	36.447	24.1765	24.1993	34.6421	27.3683	0.568768	4.96954	10.2591	0.0086391	0.960773
CG4686	1.83605	1.72372	2.27215	1.90594	1.24086	1.0807	1.32849	1.40638	0.635891	0.975879	10.0339	0.00919414	0.960773
Sar1	108.867	95.4594	111.289	101.958	85.7016	81.1462	84.6131	91.3674	0.309276	7.43281	9.87184	0.00961998	0.960773
Sodh-1	14.1223	10.1238	12.0102	13.3649	11.1613	8.29897	5.85253	8.3497	0.586786	3.85963	9.831	0.00973098	0.960773
Drat	26.0368	14.7632	17.8368	18.4141	12.3245	14.2863	12.6443	14.9604	0.53269	5.41728	9.77225	0.00989339	0.960773
BG642312	8.59729	4.40551	7.06662	7.08819	4.77799	4.41918	4.16024	3.8479	0.683091	1.6106	9.66023	0.0102121	0.960773
CG7542	2936.89	2160.57	2806.74	3020.11	2393.78	2008.06	1661.56	2008.39	0.463339	11.4237	9.51449	0.0106453	0.960773
Jon74E	42.3624	22.1685	20.4793	22.5251	22.8582	13.027	11.6431	13.5019	0.847074	4.25777	9.55292	0.0108478	0.960773
Bace	453.714	438.684	522.091	541.677	429.129	410.884	299.304	348.305	0.420454	9.25232	9.40308	0.0109914	0.960773
1295016..1296989	3.9788	4.67364	5.01867	4.48698	3.78594	3.48446	3.01965	3.69964	0.399689	2.99897	9.38019	0.0110642	0.960773
LysB	467.137	382.852	396.827	547.964	401.115	329.684	297.821	211.147	0.560616	7.8587	9.02611	0.0122667	0.960773
CG5080	20.5103	17.8927	30.8735	22.5796	16.8851	17.7546	17.1916	14.7471	0.489648	5.69991	8.97091	0.012468	0.960773
RpLP1	230.868	217.967	266.878	258.503	219.798	194.988	182.648	197.426	0.318809	7.4098	8.87315	0.0128342	0.960773
jumu	2.88326	3.1417	2.26236	2.57327	4.20262	3.98575	4.20594	3.70482	-0.543456	3.70638	18.6962	0.00127052	0.960773
Ude	20.8231	23.4549	20.9017	21.1675	28.0704	34.5697	28.687	27.6684	-0.439752	5.36772	16.3359	0.00203183	0.960773
CG14204	1.19473	1.92853	1.15326	0.994253	2.43209	2.11981	3.39793	2.18578	-0.918407	2.42964	15.7726	0.0022875	0.960773
Mp	1.14741	1.31631	1.43014	1.2426	1.67969	1.68842	1.92912	1.81908	-0.44723	3.33808	13.7645	0.00357211	0.960773
CG9717	0.985163	0.801373	0.890252	1.25163	1.59408	1.57194	1.72186	1.42576	-0.659139	1.80422	13.2668	0.00401394	0.960773
CG2990	0.189943	0.252072	0.259026	0.274848	0.402613	0.457368	0.471712	0.414836	-0.815186	0.398629	12.7451	0.00454869	0.960773
Cortactin	272.439	304.802	224.481	246.507	323.897	363.872	384.166	353.15	-0.420844	9.56327	12.1145	0.00531319	0.960773
stg	1.18309	1.47711	1.13765	1.05306	1.70351	1.70428	1.72058	2.13419	-0.5581	2.2327	12.0586	0.00538809	0.960773
CycA	15.6758	19.222	15.3858	14.8684	20.8073	21.4192	24.0738	20.3817	-0.389242	5.79155	11.9061	0.00559879	0.960773
CG1139	2.1763	3.30934	2.0927	3.24752	4.11583	3.77177	4.44181	4.53124	-0.614506	2.46465	11.5379	0.0061498	0.960773
pon	4.59674	4.69588	3.83708	3.9648	5.59836	5.77471	6.42606	5.18092	-0.402815	3.70941	10.9246	0.00721826	0.960773
CG13563	0.554184	1.02491	0.639476	0.670511	0.907995	1.44143	1.29804	1.4969	-0.807702	1.13686	10.1757	0.00883979	0.960773
c(3)G	1.72961	1.51184	1.2561	1.7447	2.05306	2.09306	2.40405	2.37109	-0.489852	2.33502	9.8833	0.00958909	0.960773
CG9184	1.11919	1.08119	0.683704	1.01515	1.96482	1.33689	1.61242	1.89794	-0.772137	0.442368	9.41629	0.0109497	0.960773
FucTA	3.50561	4.3457	3.51752	3.71487	4.61106	4.71838	5.77	4.76936	-0.374499	3.87112	9.29106	0.0113531	0.960773
CR46012	34.1616	29.0609	32.2295	26.7707	36.1689	37.6069	43.6657	43.9771	-0.377309	4.39522	9.26605	0.0114357	0.960773
CG11638	1.39488	1.27266	1.19227	1.23347	1.73458	1.64207	1.7033	1.99823	-0.449716	1.92891	8.98509	0.0124159	0.960773
Pvf2	2.66246	3.29868	3.59589	2.58845	4.82518	3.68632	4.54578	3.88139	-0.455877	2.94347	8.86123	0.0128798	0.960773
CG33337	2.42187	2.07325	2.00107	1.7698	2.59338	3.06222	2.56304	3.97943	-0.537457	2.46025	8.61388	0.0138698	0.960773
cactin	42.2069	47.9056	43.6406	42.3403	51.5622	53.6476	55.8135	53.2846	-0.260253	6.8312	8.21171	0.0156819	0.960773
SLC22A	14.7172	17.2123	14.3073	15.5815	17.7228	20.8306	22.6557	17.9824	-0.334722	5.20089	8.20409	0.0157189	0.960773
Sas-4	3.5407	4.18301	3.71897	3.97391	4.59348	4.8695	5.04574	4.90741	-0.309598	3.61519	8.19791	0.015749	0.960773
CR43670	1.84943	1.7418	1.92754	2.13658	2.47601	2.739	2.44463	2.57984	-0.395821	2.27208	8.14548	0.0160069	0.960773
16340723..16349821	0.104841	0.130727	0.0725857	0.0764844	0.185781	0.163531	0.217271	0.120897	-0.805554	0.363511	7.93486	0.0170955	0.960773
dome	54.8755	61.7134	39.3941	49.4711	67.6959	69.0208	65.6401	66.3788	-0.364763	8.17291	7.80471	0.0178128	0.960773
CG14545	0.312897	0.785069	1.35395	1.08946	1.89685	1.45036	2.94748	1.57858	-1.13471	0.289287	7.80403	0.0178166	0.960773
Rrp1	15.0079	16.7179	13.693	16.0708	17.2987	21.3285	20.6893	18.3509	-0.314357	5.47258	7.77692	0.0179705	0.960773
Agpat1	2.86705	3.51501	2.50002	1.65297	3.16012	5.10582	5.76978	3.37346	-0.702989	3.77475	7.76309	0.0180784	0.960773
CG12007	70.083	66.1809	47.8007	59.1694	80.215	79.3306	79.6611	74.372	-0.34263	7.00997	7.74347	0.0181627	0.960773
id-Dmel_CG34356	0.160431	0.16966	0.100976	0.123326	0.210836	0.218907	0.199211	0.26629	-0.662052	0.719631	7.70054	0.0184129	0.960773
